# Supplementary material for: Dysregulated serum response factor triggers formation of hepatocellular carcinoma
Source: PubMed Central journal article supplement — Hepatology. 2015 Jan 30;61(3):979–89. doi: 10.1002/hep.27539 (PMC4365683; doi:10.1002/hep.27539), 2015-01-30
Supplement: hep0061-0979-sd1.pdf [file hep0061-0979-sd1.pdf]

# Supporting Figure 1

## A

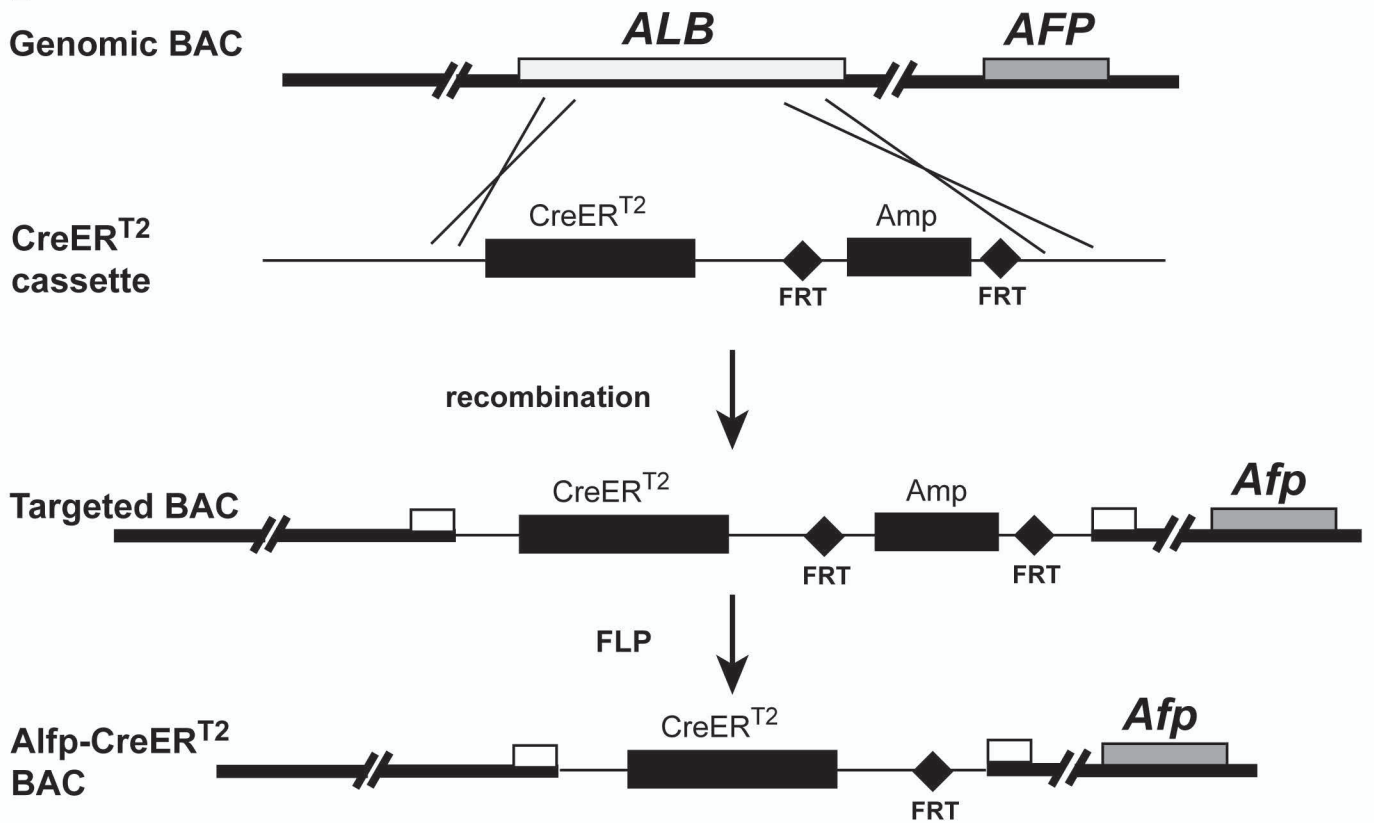

## B

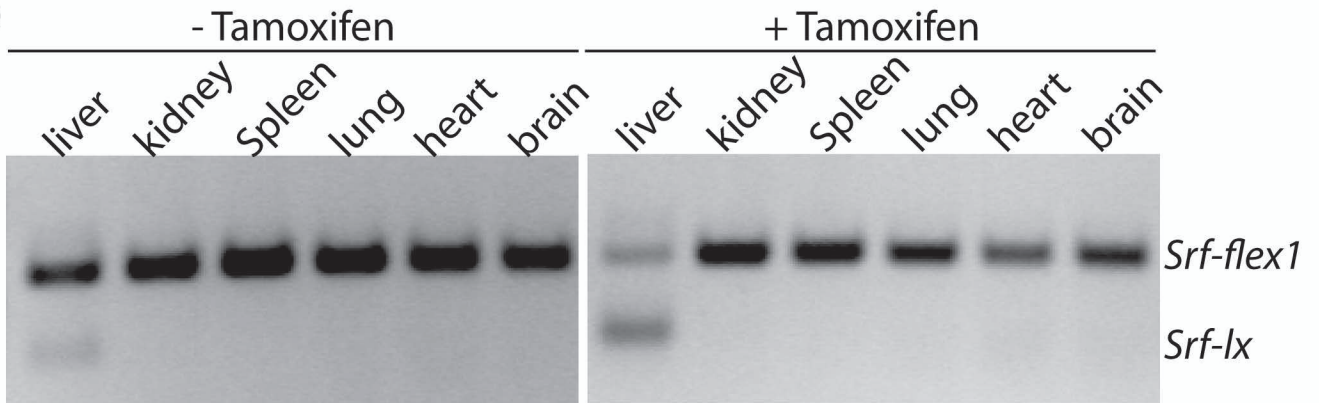

## C

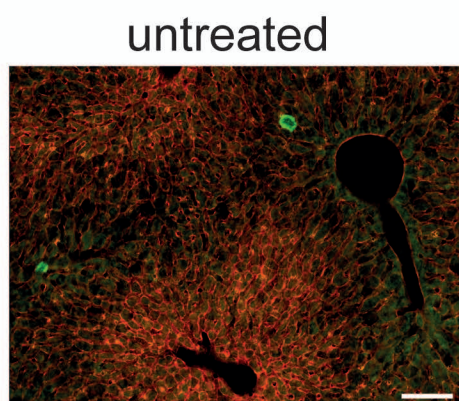

## D

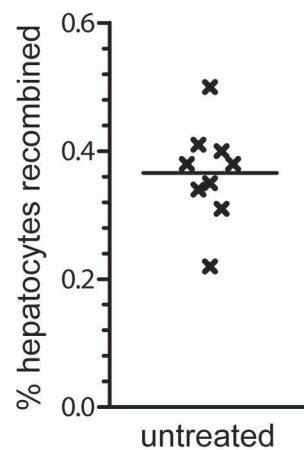

# Supporting Figure 2

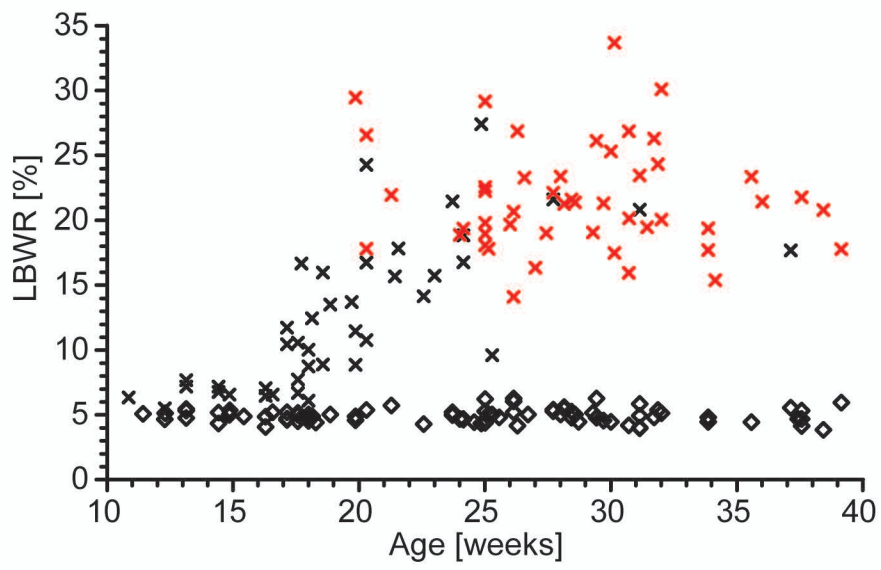

*hIGF2\_CpG-1*

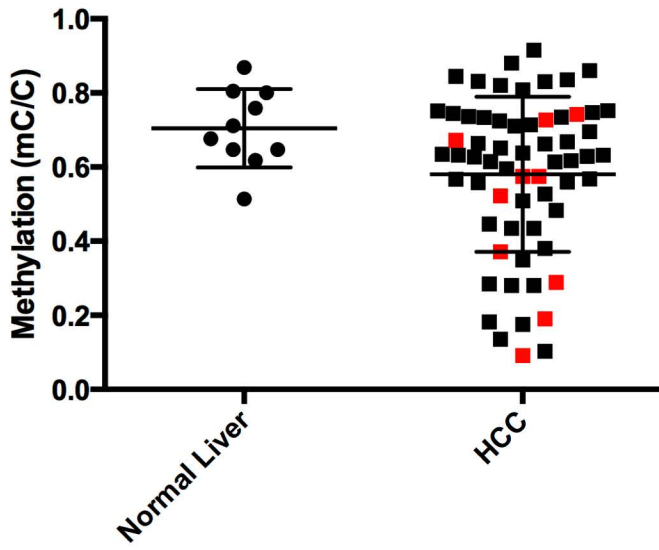

*mlgf2\_CpG-1*

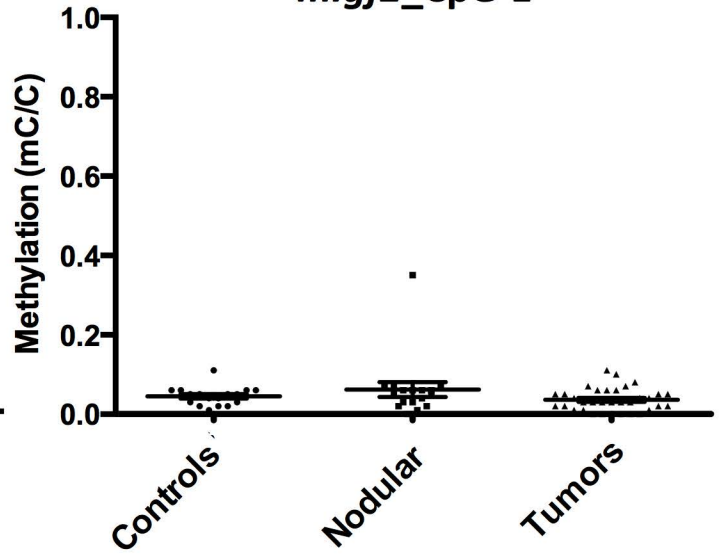

*hIGF2\_CpG-2*

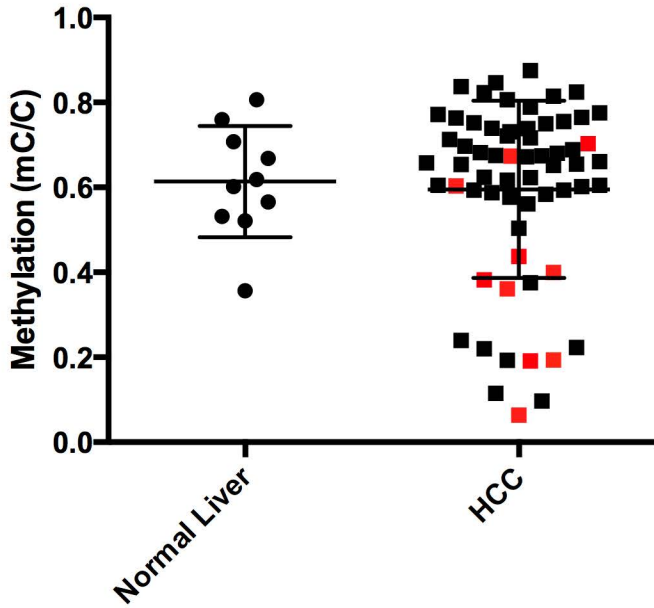

*mlgf2\_CpG-2*

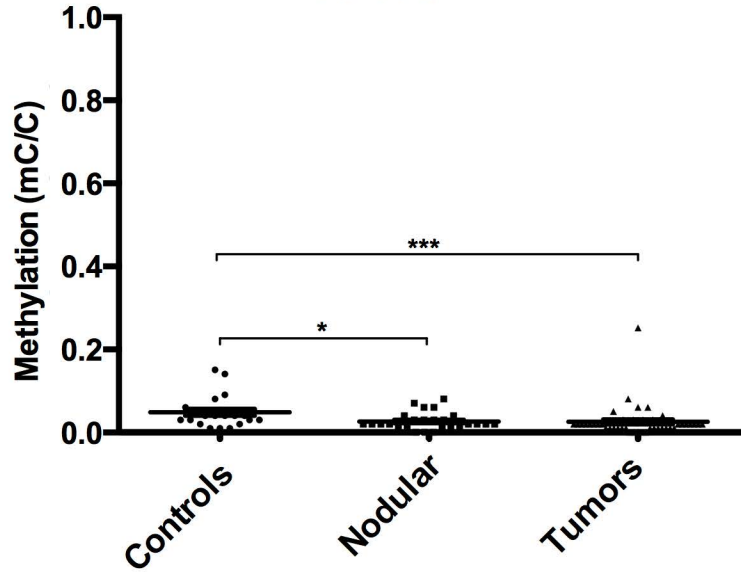

*hIGF2\_CpG-3*

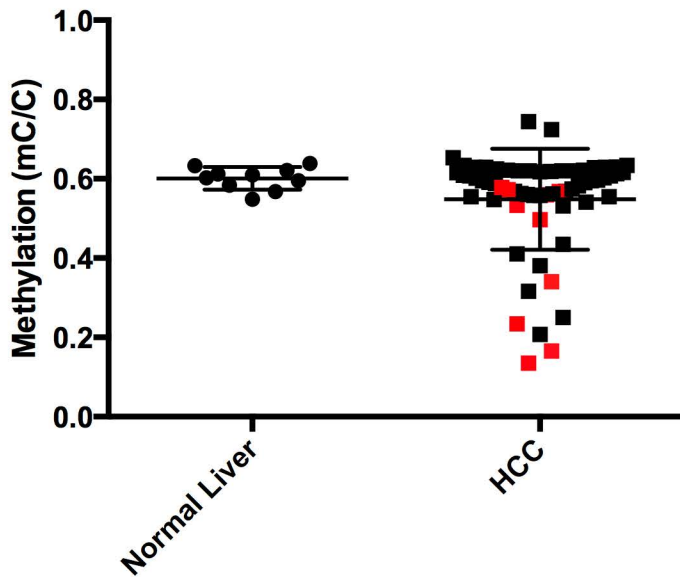

*mlgf2\_CpG-3*

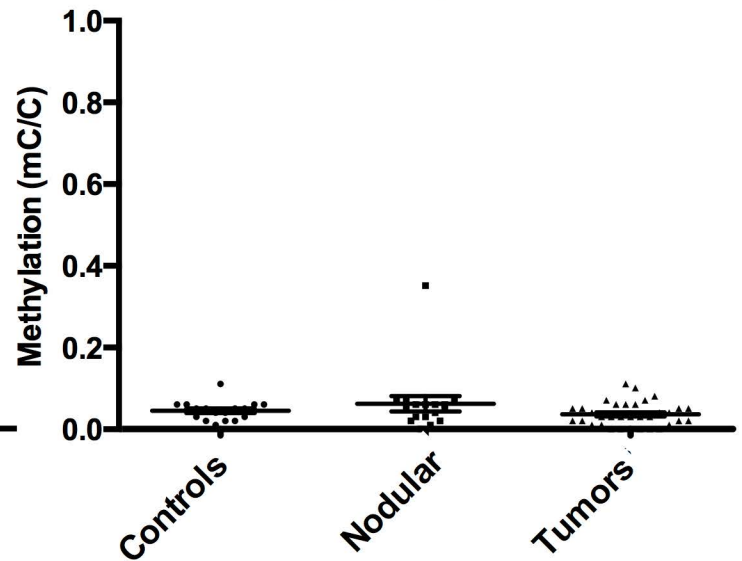

Supporting Table 1

| Sample No | Animal | Ctnnb1 mutations |                     |                     |
|-----------|--------|------------------|---------------------|---------------------|
|           |        | Mutated Codon    | Nucleotide exchange | Amino Acid exchange |
| 1         | A      | 34               | GGA to GTA          | Gly to Val          |
| 2         | B      | 41               | ACC to ATC          | Thr to Ile          |
| 3         | C      | 37               | TCT to TTT          | Ser to Phe          |
| 4         | D/1    | 34               | GGA to AGA          | Gly to Arg          |
| 5         | D/2    | 34               | GGA to GAA          | Gly to Glu          |
| 6         | E/1    | 41               | ACC to ATC          | Thr to Ile          |
| 7         | E/2    | 41               | ACC to ATC          | Thr to Ile          |
| 8         | F      | 37               | TCT to TTT          | Ser to Phe          |
| 9         | F/2    | 32               | GAT to TAT          | Asp to Tyr          |
| 10        | G/1    | 37               | TCT to GCT          | Ser to Ala          |
| 11        | G/2    | wt               | -                   | -                   |
| 12        | H/1    | wt               | -                   | -                   |
| 13        | H/2    | 41               | ACC to ATC          | Thr to Ile          |
| 14        | H/3    | 41               | ACC to ATC          | Thr to Ile          |
| 15        | H/4    | wt               | -                   | -                   |
| 16        | I      | wt               | -                   | -                   |
| 17 - 26   | other  | wt               | -                   | -                   |
| Control   | other  | wt               | -                   | -                   |

Supporting Table 2

| Supporting Table 2, (All deregulated transcripts) |                                      |                                    |                                    |                |
|---------------------------------------------------|--------------------------------------|------------------------------------|------------------------------------|----------------|
| Gene Symbol                                       | Fold-Change<br>(Nodular vs. Control) | Fold-Change<br>(HCC_A vs. Control) | Fold-Change<br>(HCC_B vs. Control) | Legend         |
| Igf2                                              | 13.0706                              | 106.18                             | 104.187                            | -15<br>onwards |
| Bex1                                              | 4.14501                              | 70.4085                            | 83.8178                            | -3 to -15      |
| H19                                               | 35.4462                              | 72.6964                            | 82.688                             | -3 to -1       |
| Cpe                                               | 1.64063                              | 46.8117                            | 53.0535                            | 1 to 3         |
| Thbs1                                             | 2.08549                              | 4.91817                            | 51.9212                            | 3 to 15        |
| Ly6d                                              | 6.73055                              | 16.5762                            | 51.0326                            | 15<br>onwards  |
| Plat                                              | 2.29332                              | 11.7479                            | 49.546                             |                |
| Amy2a5                                            | 1.27193                              | 1.19032                            | 47.5007                            |                |
| Gldn                                              | 39.4078                              | 40.8852                            | 45.0136                            |                |
| Igfbp1                                            | 3.38984                              | 12.1705                            | 42.3844                            |                |
| Psat1                                             | 7.16688                              | 40.6757                            | 35.0885                            |                |
| Cd63                                              | 19.9898                              | 31.7967                            | 34.6431                            |                |
| Tff3                                              | 35.3782                              | 21.4822                            | 33.6629                            |                |
| Car4                                              | -1.07624                             | -1.01248                           | 30.1643                            |                |
| S100a6                                            | 1.17083                              | 5.86993                            | 24.96                              |                |
| Igfbp6                                            | 2.36218                              | 29.0217                            | 24.672                             |                |
| Gm10009                                           | 2.60015                              | 19.0142                            | 22.2096                            |                |
| Grb10                                             | 1.20993                              | 2.60554                            | 21.4907                            |                |
| Isyna1                                            | 5.75287                              | 10.6821                            | 21.4561                            |                |
| Endod1                                            | 7.56378                              | 12.2761                            | 21.3653                            |                |
| Amy2a5                                            | 1.10473                              | -1.02031                           | 20.7141                            |                |
| Atp6v0d2                                          | 10.3332                              | 11.5034                            | 19.8                               |                |
| Sema3c                                            | 1.11058                              | -1.23529                           | 19.5512                            |                |
| Klrb1a                                            | 10.9824                              | 52.5957                            | 19.5293                            |                |
| Vil1                                              | 9.1913                               | 23.8275                            | 19.3018                            |                |
| Tspan8                                            | 3.09904                              | 62.7977                            | 18.5679                            |                |
| A2m                                               | 2.17952                              | 37.2123                            | 18.2744                            |                |
| Ngfrap1                                           | 2.14401                              | 19.9094                            | 17.7802                            |                |
| Scd2                                              | 14.023                               | 23.1374                            | 17.7057                            |                |
| Amy2a5                                            | 1.02195                              | -1.08801                           | 17.1522                            |                |
| Aldh1a2                                           | 1.27576                              | 1.87903                            | 17.0396                            |                |
| H19                                               | 7.27607                              | 16.54                              | 16.8041                            |                |
| Klhl23                                            | 1.4497                               | 2.90572                            | 16.5211                            |                |
| Timp1                                             | 1.65025                              | 47.5328                            | 16.1436                            |                |
| Prom2                                             | 19.786                               | 7.73123                            | 15.9955                            |                |
| Gpr64                                             | 1.31667                              | 1.16271                            | 14.8597                            |                |
| Fam180a                                           | 1.22292                              | 1.1703                             | 13.9817                            |                |
| Myof                                              | 1.14777                              | 4.62237                            | 13.94                              |                |
| Atp10a                                            | 1.40459                              | 1.24109                            | 13.9305                            |                |
| BB287469                                          | 3.16481                              | 5.00259                            | 13.7124                            |                |
| Pamr1                                             | 1.74829                              | 12.0232                            | 13.369                             |                |

|             |         |          |         |
|-------------|---------|----------|---------|
| Kcnk16      | 3.71014 | 14.0864  | 13.2229 |
| Gdpd1       | 2.01728 | 10.77    | 13.1723 |
| Airn        | 1.51036 | 1.8283   | 13.1623 |
| Lpl         | 9.2723  | 17.1384  | 12.8959 |
| Renbp       | 5.09671 | 10.5479  | 12.5961 |
| Actn3       | 1.17095 | 12.833   | 12.4529 |
| Elovl7      | 1.76477 | 9.87082  | 12.1677 |
| Cidea       | 4.71218 | 12.7792  | 11.9462 |
| S100a11     | 3.04926 | 10.1551  | 11.741  |
| S100a11     | 2.84035 | 9.99611  | 11.5009 |
| Tubb2b      | 1.00878 | 5.33524  | 11.2852 |
| Egr1        | 7.12353 | 9.59988  | 11.1919 |
| Fzd3        | 2.15193 | 9.45774  | 11.0001 |
| Pfkip       | 2.09759 | 8.0406   | 10.9916 |
| Gpr110      | 9.05365 | 10.0856  | 10.9086 |
| Gls         | 2.70557 | 8.9526   | 10.83   |
| Mfge8       | 5.89407 | 15.245   | 10.6241 |
| Cd9         | 2.62638 | 8.33254  | 10.6122 |
| D17H6S56E-5 | 6.47345 | 18.8674  | 10.5344 |
| Slc41a3     | 5.1175  | 10.6934  | 10.5293 |
| Prss8       | 12.5191 | 10.939   | 10.5258 |
| Exph5       | 3.74248 | 12.1851  | 10.2914 |
| Pygb        | 10.1333 | 13.0745  | 9.95799 |
| Cdh1        | 8.5354  | 9.39522  | 9.91473 |
| Sprr1a      | 1.3643  | 11.0886  | 9.88433 |
| Anxa2       | 2.72963 | 8.79089  | 9.86025 |
| Btg3        | 2.78741 | 7.46891  | 9.86013 |
| Pgm5        | 1.00426 | -2.07172 | 9.72864 |
| Abca5       | 1.63917 | 4.77238  | 9.70687 |
| Mtmr11      | 3.94909 | 6.62247  | 9.69818 |
| Rbp1        | 7.8876  | 12.5966  | 9.67947 |
| Ank2        | 3.11874 | 8.15344  | 9.638   |
| Serpine1    | 1.00661 | 2.60234  | 9.61473 |
| Ii1rn       | 6.74055 | 13.9341  | 9.59099 |
| Tspan13     | 1.85836 | 12.2182  | 9.55444 |
| Anxa9       | 3.47984 | 9.54407  | 9.51122 |
| Doc2b       | 1.53581 | 4.30385  | 9.50577 |
| Tmprss2     | 1.59783 | 5.42373  | 9.42569 |
| Btg3        | 2.66288 | 6.92621  | 9.08706 |
| Klf6        | 1.93955 | 3.98327  | 8.95502 |
| Fads3       | 1.29174 | 7.54847  | 8.95494 |
| Gramd1b     | 2.4949  | 7.98577  | 8.87626 |
| Sdcbp2      | 1.27869 | 5.98796  | 8.74705 |
| Icosl       | 1.40206 | 4.1478   | 8.7431  |
| Fhl3        | 1.91853 | 6.17309  | 8.61935 |
| Cyp2c39     | -2.4884 | -3.41308 | 8.56776 |
| Gpc3        | 1.2189  | -1.0577  | 8.43606 |
| Wbp5        | 1.98874 | 8.5141   | 8.40853 |

|                   |          |          |         |
|-------------------|----------|----------|---------|
| Nipal1            | 3.74538  | 6.1154   | 8.38608 |
| Serpinb6a         | 1.09597  | 4.37469  | 8.3815  |
| Tagln2            | 3.37127  | 12.1793  | 8.35988 |
| Ctse              | -1.14317 | 2.24757  | 8.32345 |
| Npdc1             | 3.17838  | 8.58407  | 8.29445 |
| Cdkn1a            | 2.56134  | 10.6345  | 8.26152 |
| Rhoc              | 4.3488   | 7.8295   | 8.21062 |
| Ahnak             | 3.63901  | 4.49717  | 8.16587 |
| Dsg1a             | 8.85303  | 13.2246  | 8.11545 |
| Fst               | 1.71736  | 2.77924  | 8.07653 |
| Nid1              | 3.58113  | 6.50475  | 8.0618  |
| Lgr5              | -1.60272 | -3.05043 | 7.96855 |
| Ndrgr1            | 1.33074  | 3.87773  | 7.9237  |
| Tuft1             | 3.39158  | 7.78037  | 7.90369 |
| Igdcc4            | 6.51365  | 8.2501   | 7.90271 |
| Asns              | 3.13885  | 13.015   | 7.89346 |
| Serpinb6b         | 3.29153  | 15.1716  | 7.88894 |
| Alox5             | 6.12594  | 13.7385  | 7.87295 |
| Prrg4             | 2.84183  | 10.1024  | 7.8525  |
| B4galt6           | 2.67601  | 10.502   | 7.81907 |
| Prom1             | 1.08693  | 13.2349  | 7.78962 |
| 1700019D03R<br>ik | 7.73199  | 15.8857  | 7.73591 |
| Pdk3              | 4.58984  | 10.8771  | 7.70526 |
| Btg2              | 1.94839  | 6.48019  | 7.70054 |
| Ankrd1            | 1.30593  | 7.61296  | 7.68294 |
| Nfe2l3            | 2.32607  | 5.16753  | 7.61183 |
| Scn7a             | 1.23589  | 1.33226  | 7.58004 |
| Qpct              | 1.36173  | 3.16435  | 7.57698 |
| Dsg1c             | 8.14632  | 13.65    | 7.56418 |
| Tes               | 1.24152  | 5.46319  | 7.53173 |
| Emp2              | 3.3592   | 7.08816  | 7.46271 |
| Arhgef2           | 1.75667  | 3.8315   | 7.44808 |
| Tuba8             | 2.84794  | 5.6782   | 7.29897 |
| Irak3             | 1.3035   | 5.31299  | 7.27636 |
| Spon2             | 1.92218  | 8.47313  | 7.20515 |
| 9330182L06Ri<br>k | -1.01816 | -1.19713 | 7.06272 |
| Car2              | 1.61412  | 1.84939  | 7.03633 |
| Lama5             | 1.58734  | 3.43088  | 7.02658 |
| Bex4              | 1.51721  | 8.38808  | 7.00337 |
| Gadd45b           | 2.92788  | 4.5953   | 6.82919 |
| Bean              | 1.15701  | 4.26964  | 6.81531 |
| Fam60a            | 1.60943  | 3.37575  | 6.78991 |
| Esm1              | 3.60362  | 4.59846  | 6.78101 |
| Ier3              | 1.08138  | 5.80369  | 6.77032 |
| Prkg1             | 1.13572  | 1.40601  | 6.74905 |
| Rnase1            | 1.01507  | 1.90926  | 6.73912 |

|               |          |          |         |
|---------------|----------|----------|---------|
| Shc2          | 3.05136  | 4.75543  | 6.69837 |
| Cyp2a22       | 4.93043  | 4.69614  | 6.67687 |
| Ms4a6b        | 1.34342  | 4.28724  | 6.63812 |
| Ifngr1        | 2.15542  | 5.30745  | 6.54226 |
| Afp           | 2.02558  | 6.71102  | 6.52713 |
| Tnfrsf12a     | 1.09862  | 5.68673  | 6.48475 |
| Vmn2r96       | 1.02409  | 1.28406  | 6.3979  |
| Fam60a        | 1.62115  | 3.17408  | 6.3873  |
| Ddr1          | 2.76707  | 6.42184  | 6.3809  |
| Pdk4          | -1.76524 | -2.28266 | 6.37712 |
| Gprc5b        | 2.11293  | 12.1687  | 6.37402 |
| Tmem146       | 2.01464  | 2.91759  | 6.36124 |
| 2210415F13Rik | 2.37774  | 42.0677  | 6.35613 |
| Itp3          | 1.1773   | 2.22053  | 6.31221 |
| Tmem71        | 2.88098  | 5.26188  | 6.30031 |
| Hunk          | 2.33346  | 3.49332  | 6.29368 |
| Slc9a7        | 3.83141  | 5.66896  | 6.28187 |
| C630004H02Rik | 1.44044  | 5.80207  | 6.24923 |
| Slc7a9        | 3.25909  | 6.81217  | 6.24412 |
| Rab3d         | 2.80474  | 7.17591  | 6.24308 |
| Ets2          | 2.14067  | 5.47127  | 6.20986 |
| Sytl2         | 1.92819  | 7.53775  | 6.19514 |
| Gpnmb         | 1.59939  | 4.53371  | 6.19502 |
| Sort1         | 2.00931  | 3.24934  | 6.17537 |
| Uap1l1        | 2.06694  | 4.06125  | 6.17233 |
| Fstl3         | 1.20238  | 13.2344  | 6.15396 |
| Slc25a4       | 1.19532  | 11.1056  | 6.1421  |
| Gprc5a        | -1.12317 | 3.77205  | 6.13673 |
| Vim           | 1.80453  | 5.04181  | 6.11242 |
| Psrc1         | 1.98382  | 6.49131  | 6.10586 |
| Bex4          | 1.57299  | 7.25978  | 6.08689 |
| Mst1r         | 3.71999  | 5.3754   | 6.01186 |
| Gcom1         | 1.30506  | 1.90889  | 5.8833  |
| Lef1          | 1.17957  | -1.09654 | 5.87547 |
| Nucb2         | 3.35072  | 10.505   | 5.87321 |
| Rab34         | 1.45297  | 5.27628  | 5.83746 |
| Gpr56         | 5.11677  | 12.1684  | 5.83111 |
| Gm609         | 3.29495  | 13.9363  | 5.77995 |
| Hsd3b1        | 2.58561  | 3.71798  | 5.76826 |
| Avpr1a        | 1.13453  | -3.21862 | 5.75576 |
| Greb1l        | 3.75959  | 5.05224  | 5.69895 |
| Arnt2         | 1.17737  | 2.32996  | 5.69168 |
| Slc30a3       | 3.42807  | 2.97002  | 5.67673 |
| Atf3          | 1.60595  | 4.35421  | 5.6749  |
| Neto1         | 1.19963  | 9.1769   | 5.66694 |
| Nedd9         | 2.26994  | 5.35801  | 5.65459 |



|          |          |          |         |
|----------|----------|----------|---------|
| Syt15    | 3.03613  | 2.93842  | 5.64002 |
| Akr1b7   | 1.15743  | 1.3269   | 5.63946 |
| Calml4   | 1.36695  | 1.68447  | 5.63328 |
| Map3k1   | 1.6328   | 3.07655  | 5.63151 |
| H2-Q1    | 1.20387  | 1.02656  | 5.60883 |
| F2rl1    | 1.68027  | 5.71852  | 5.59453 |
| Akr1c18  | 49.7676  | 21.7316  | 5.5744  |
| Tmem229a | 3.35119  | 4.85819  | 5.55358 |
| Pak1     | 1.91676  | 6.07377  | 5.54321 |
| Pls1     | 2.44901  | 5.35746  | 5.51857 |
| P2rx7    | 3.97408  | 5.51089  | 5.49297 |
| Bicc1    | 1.19575  | 7.15674  | 5.47193 |
| Acs14    | 2.65093  | 3.95778  | 5.47142 |
| Crip1    | 4.21983  | 14.2125  | 5.45513 |
| Kitl     | 1.08971  | -1.04084 | 5.45247 |
| Spire2   | 2.101    | 4.43777  | 5.44309 |
| Nck2     | 1.75855  | 3.79152  | 5.41274 |
| Nck2     | 1.7388   | 3.90709  | 5.38822 |
| Marcks   | 1.2033   | 2.50563  | 5.38596 |
| Reln     | 1.86953  | 3.13537  | 5.3344  |
| Cln6     | 2.08005  | 2.10961  | 5.31563 |
| Map4k4   | 1.23531  | 3.03238  | 5.30628 |
| Lgi3     | -1.06298 | 4.19448  | 5.30147 |
| Il1r1    | 1.12411  | 1.63986  | 5.29949 |
| Igfbp3   | 1.52148  | 3.69581  | 5.27951 |
| Fxyd3    | 1.44729  | 2.63349  | 5.21073 |
| Ano6     | 1.33296  | 4.19192  | 5.192   |
| Kdelr3   | 1.30194  | 12.8574  | 5.16865 |
| Plekha2  | 1.83419  | 5.72416  | 5.16824 |
| Nrip2    | 4.6399   | 10.8553  | 5.15543 |
| Cldnd2   | 2.91965  | 2.39652  | 5.15015 |
| Tead1    | 1.03918  | 2.4646   | 5.14323 |
| Nxn      | 3.96522  | 6.48999  | 5.11001 |
| Cav2     | 1.82037  | 5.91925  | 4.9881  |
| Pbx3     | 1.43596  | 3.73401  | 4.98795 |
| Bace2    | 2.42809  | 5.45315  | 4.9749  |
| Nkd1     | -1.33408 | -1.54123 | 4.97379 |
| Casp12   | 1.23194  | 13.2394  | 4.9444  |
| Gnai1    | -1.16355 | 1.59782  | 4.93125 |
| Msrb3    | 1.92161  | 4.03946  | 4.92765 |
| Peg3     | 2.29478  | 14.9933  | 4.9231  |
| Myadm    | 3.65914  | 5.59333  | 4.91929 |
| Abi2     | 2.97396  | 4.61103  | 4.90677 |
| Plp2     | 1.69916  | 5.35561  | 4.90373 |
| Sectm1b  | 4.88913  | 8.58831  | 4.9001  |
| Gipc2    | 1.83053  | 5.08525  | 4.89887 |
| Lamb2    | 1.29096  | 3.08907  | 4.86585 |
| Lrrc8e   | 2.13486  | 5.51888  | 4.86352 |

|                   |          |          |         |
|-------------------|----------|----------|---------|
| Krt20             | 25.2349  | 36.9497  | 4.85659 |
| Sox4              | 1.08731  | 3.03844  | 4.85544 |
| Clcn5             | 1.30899  | 4.17789  | 4.80256 |
| Dab1              | 1.03268  | 4.40051  | 4.80036 |
| Myo7b             | 2.01334  | 5.6901   | 4.76924 |
| Sytl5             | 2.3502   | 2.31346  | 4.75861 |
| Cpm               | 1.62425  | 3.37618  | 4.75455 |
| Tgfbr2            | 3.27318  | 3.41756  | 4.70115 |
| Nt5e              | -1.27147 | 1.69504  | 4.6977  |
| Myc               | 1.75926  | 2.33816  | 4.67115 |
| Vill              | 1.53434  | 9.42062  | 4.66066 |
| AB041803          | 1.44529  | 1.2449   | 4.64783 |
| Mbnl3             | 1.66665  | -1.10086 | 4.64415 |
| Stra6             | -1.23762 | -1.15354 | 4.63909 |
| Cyp39a1           | 2.25186  | 4.46286  | 4.63808 |
| App               | 2.35505  | 5.11848  | 4.62793 |
| Fam118a           | 1.33209  | 2.1546   | 4.58336 |
| Tspan15           | 5.3506   | 5.13268  | 4.55849 |
| Anxa3             | 1.11144  | 1.9111   | 4.55771 |
| Slc24a4           | 1.47247  | 1.8503   | 4.54259 |
| AU040829          | 1.27338  | 1.94409  | 4.51874 |
| Nhs1              | 1.94734  | 2.80223  | 4.5084  |
| Pdgfrl            | 1.26066  | 1.32596  | 4.50503 |
| Fgl2              | 3.57767  | 8.03434  | 4.49587 |
| Jun               | 1.37278  | 2.56083  | 4.49577 |
| Emp1              | 1.60918  | 5.04904  | 4.47725 |
| Dnm3              | 1.81426  | 3.23191  | 4.45213 |
| F3                | 1.9605   | 5.77645  | 4.45007 |
| 9430020K01R<br>ik | 2.74853  | 4.03468  | 4.42816 |
| Mybl1             | 1.1249   | 2.61006  | 4.42467 |
| Pdgfc             | -1.00582 | 1.22476  | 4.40043 |
| Kdm3a             | 1.49398  | 2.31991  | 4.37713 |
| Tead1             | -1.01996 | 2.65785  | 4.36727 |
| Sorcs2            | 1.99351  | 1.7816   | 4.3395  |
| Chka              | 1.8503   | 4.62245  | 4.33907 |
| 4930583H14R<br>ik | 1.08878  | 5.01167  | 4.33725 |
| Ahnak2            | 1.28699  | 1.91062  | 4.32487 |
| Chmp4c            | 1.57641  | 3.98372  | 4.30406 |
| Tpm1              | 2.03419  | 3.72081  | 4.29852 |
| Gars              | 1.14943  | 2.14023  | 4.29665 |
| Tnfrsf10b         | 1.45766  | 5.73675  | 4.28498 |
| Bcl2              | 1.71873  | 4.01043  | 4.26536 |
| Axin2             | -1.55682 | -1.90796 | 4.26261 |
| Cd34              | 2.41893  | 4.28237  | 4.24709 |
| Lipn              | 1.13009  | 11.7467  | 4.23466 |
| Rab11fip5         | 1.70224  | 2.30633  | 4.22295 |

|               |          |          |         |
|---------------|----------|----------|---------|
| Slpi          | 1.0836   | 7.27965  | 4.22289 |
| Eppk1         | 1.72853  | 2.89305  | 4.22017 |
| Wisp1         | 1.06314  | 3.25814  | 4.20828 |
| Fam164a       | -1.07379 | 4.23514  | 4.20138 |
| 2310014L17Rik | 2.83497  | 2.95718  | 4.1966  |
| Ift57         | 1.02921  | 4.74934  | 4.1962  |
| Dgki          | -1.00017 | 1.00768  | 4.19226 |
| Nbea          | 1.542    | -1.15957 | 4.18891 |
| Nhs           | 1.03324  | 1.1865   | 4.17909 |
| Mpped2        | 1.06649  | 1.21094  | 4.17671 |
| Ppl           | 2.03116  | 3.58744  | 4.17298 |
| Tubb6         | 1.62878  | 5.80135  | 4.15945 |
| Osmr          | 1.94046  | 6.47489  | 4.1503  |
| Plp2          | 1.51168  | 4.284    | 4.14651 |
| 8430408G22Rik | 1.67028  | 1.35312  | 4.1424  |
| Tm4sf4        | 1.24868  | 3.50315  | 4.12694 |
| Scn1b         | 1.9556   | 4.26867  | 4.11135 |
| Igfbp2        | 2.41207  | 1.50469  | 4.10303 |
| Bicc1         | 1.0846   | 5.02574  | 4.09107 |
| Aph1b         | 4.71319  | 5.51693  | 4.07686 |
| Dapp1         | 1.7537   | 5.15539  | 4.06593 |
| Atp8b2        | 1.47684  | 3.76801  | 4.0435  |
| Meg3          | 1.54929  | 1.84969  | 4.03932 |
| Unc5b         | 1.15499  | 2.87726  | 4.03812 |
| Syt12         | 1.62041  | 3.31475  | 4.03099 |
| Wfdc3         | -1.00673 | 6.50794  | 4.02464 |
| Acot9         | 1.41582  | 4.53745  | 4.02427 |
| Cpd           | 2.90292  | 4.83164  | 4.02178 |
| Flna          | 1.25121  | 3.12101  | 4.01645 |
| Pawr          | 1.59562  | 2.53621  | 4.01331 |
| Reep2         | 1.61276  | 4.89227  | 4.00625 |
| Vsig10        | 1.95755  | 3.41315  | 3.99968 |
| Gm106         | -1.06414 | -1.11429 | 3.99904 |
| Nup93         | 2.26485  | 4.06977  | 3.95922 |
| Bglap-rs1     | 2.81185  | 8.99936  | 3.94107 |
| Large         | 1.38289  | 3.41726  | 3.93582 |
| BC016579      | 1.91294  | 2.64391  | 3.93322 |
| Kif5c         | 1.45518  | 5.20984  | 3.92793 |
| Kif26b        | -1.15818 | -1.06891 | 3.92261 |
| Igf2r         | 1.25006  | 1.86361  | 3.92101 |
| Gm5068        | 1.4691   | 3.32936  | 3.91514 |
| Ophn1         | 1.57477  | 2.32817  | 3.91021 |
| Pqlc3         | 1.15279  | 4.56658  | 3.90818 |
| A930039A15Rik | -1.11859 | -1.8525  | 3.90423 |
| Slc1a4        | 2.13713  | 3.45931  | 3.90342 |

|                   |          |          |         |
|-------------------|----------|----------|---------|
| Cd24a             | 1.29066  | 2.83077  | 3.89559 |
| Ctps2             | 2.56166  | 4.45756  | 3.89212 |
| Vat1              | 1.19325  | 3.19253  | 3.88115 |
| Samd4             | 1.63082  | 2.58163  | 3.87426 |
| Slc13a3           | 1.10204  | -1.30609 | 3.85914 |
| Ip6k2             | 1.45756  | 2.29722  | 3.85898 |
| Tlr1              | 2.82985  | 5.48467  | 3.85342 |
| Tubb2b            | -1.05615 | 2.21446  | 3.83744 |
| Lysmd2            | 2.74342  | 5.61356  | 3.82383 |
| Stk39             | 1.3987   | 1.81507  | 3.81425 |
| Cyp1b1            | 1.1714   | 1.61994  | 3.80599 |
| Tcfcp2l1          | -1.23418 | 3.53597  | 3.77991 |
| Mfsd7c            | 2.09292  | 2.19617  | 3.77627 |
| Fam46a            | 2.40949  | 2.41219  | 3.76938 |
| Phf16             | 1.20743  | 1.95792  | 3.75937 |
| Pvr               | 1.4959   | 3.7118   | 3.75486 |
| Mllt3             | 1.76269  | 3.22563  | 3.75399 |
| Ahr               | 1.07848  | -1.1266  | 3.74628 |
| Plp2              | 1.44989  | 3.76823  | 3.73505 |
| Slc6a8            | 2.15762  | 3.78039  | 3.73228 |
| Aebp1             | 2.42105  | 6.68952  | 3.73151 |
| Rbm3              | 1.91291  | 3.86143  | 3.73123 |
| Rbm3              | 1.99141  | 3.84582  | 3.72106 |
| Tmem159           | 2.11069  | 3.87068  | 3.71105 |
| Nhs1              | 2.06731  | 2.38845  | 3.7094  |
| Rnf145            | 2.77777  | 1.97041  | 3.70769 |
| Fndc3b            | 3.06655  | 4.50885  | 3.69663 |
| Gria3             | 4.80474  | 3.29561  | 3.69443 |
| Trib2             | 1.14067  | -1.03944 | 3.69378 |
| Zfp791            | 2.60988  | 1.79013  | 3.69193 |
| Jub               | 1.70833  | 2.85167  | 3.6866  |
| Abhd2             | 3.97243  | 3.67989  | 3.67789 |
| Kbtbd11           | 1.10593  | 1.78587  | 3.6646  |
| Amot              | 1.86196  | 2.69374  | 3.64281 |
| Gm16368           | 1.86886  | 1.69534  | 3.64028 |
| Fam46a            | 1.80852  | 2.17444  | 3.63448 |
| Usp18             | 1.6608   | 1.31658  | 3.63422 |
| Slc1a5            | 1.34936  | 1.5014   | 3.62642 |
| Mthfd1l           | 1.89189  | 2.60746  | 3.61965 |
| Rbm3              | 1.88842  | 3.65444  | 3.6174  |
| Itpril2           | 1.14153  | 3.53884  | 3.61548 |
| Tnfrsf19          | -1.06917 | -1.07949 | 3.61079 |
| Tcf7              | 1.58987  | 1.36497  | 3.60845 |
| 2900073G15R<br>ik | 1.538    | 3.369    | 3.58323 |
| 5430435G22R<br>ik | 1.06237  | 4.0124   | 3.58242 |
| Lrrc39            | 1.41063  | 3.6271   | 3.57449 |

|                   |          |                |         |
|-------------------|----------|----------------|---------|
| Slc36a4           | 1.75749  | 2.26485        | 3.57346 |
| Ccdc120           | 1.74833  | 2.57961        | 3.56563 |
| Dnase2a           | 1.46145  | 1.81648        | 3.55765 |
| Spnb1             | 1.29476  | 1.34631        | 3.55625 |
| Kcnk6             | 1.43689  | 3.51939        | 3.52936 |
| Lass5             | 1.18263  | 4.5423         | 3.52472 |
| Cldn4             | 2.42913  | 6.31882        | 3.49684 |
| Sestd1            | 2.46276  | 2.70033        | 3.48568 |
| Ctnnal1           | 1.31961  | 3.19723        | 3.48299 |
| Gas5              | 1.06989  | 2.0137         | 3.48149 |
| Tubb5             | 1.66085  | 3.08278        | 3.45829 |
| Slc7a5            | -1.13822 | 1.99886        | 3.42924 |
| Bcas1             | 1.007    | 2.19729        | 3.42867 |
| Lrrc20            | 1.55586  | 3.45442        | 3.42526 |
| Etl4              | 1.71862  | 2.09061        | 3.4242  |
| Dst               | 1.30004  | 1.5423         | 3.42389 |
| Trpm4             | 1.73068  | 2.57956        | 3.42261 |
| 0610010012R<br>ik | 2.42824  | 4.61777        | 3.42223 |
| Ehd2              | 1.27954  | 2.21252        | 3.41551 |
| Rnf157            | 1.00614  | 2.07279        | 3.40509 |
| Alpk1             | 1.65124  | 2.24658        | 3.4031  |
| Bcl2l11           | 1.79753  | 2.62299        | 3.3986  |
| Paqr4             | 2.54715  | 3.07095        | 3.38889 |
| Plxdc2            | 1.2421   | 1.3925         | 3.38607 |
| Asap2             | 1.06441  | 1.55682        | 3.38489 |
| Fabp4             | 1.80352  | 3.77438        | 3.38366 |
| Tmtc1             | 1.06315  | 1.31514        | 3.37569 |
| Crip2             | 1.65246  | 2.30151        | 3.36999 |
| 2210404007R<br>ik | 3.39894  | 7.82352        | 3.36835 |
| Sparcl1           | -1.04515 | 3.58349        | 3.36672 |
| Epdr1             | 1.02145  | 3.43673        | 3.35557 |
| Ptpn21            | 1.12247  | 1.65068        | 3.35423 |
| Gas7              | 1.67387  | 2.86578        | 3.35126 |
| Plekha1           | 1.70521  | 3.46835        | 3.35078 |
| Cstb              | 1.3504   | 4.23136        | 3.3417  |
| Wdr1              | 2.02059  | 3.50992        | 3.33673 |
| Pdp1              | 1.62322  | 4.86772        | 3.33339 |
| Dpysl5            | 1.11961  | 3.15093        | 3.32346 |
| Itga3             | -1.11704 | 2.27527        | 3.32297 |
| Myh9              | 2.03021  | 3.16179        | 3.31906 |
| Sstr2             | 4.20507  | 8.52599        | 3.30849 |
| Scn3a             | 1.09246  | 1.12372        | 3.30656 |
| Exoc6b            | 1.26993  | 2.2112         | 3.30552 |
| Enc1              | 1.10151  | 1.77068        | 3.3031  |
| Wnk4              | 1.33303  | 1.59406        | 3.30218 |
| Lcn2              | 1.63729  | <b>17.7337</b> | 3.28789 |

|                   |          |          |         |
|-------------------|----------|----------|---------|
| Cdkn2c            | 2.3356   | 2.99309  | 3.28594 |
| Mmp14             | 1.5002   | 2.78963  | 3.28305 |
| Phgdh             | 1.66327  | 5.22063  | 3.27777 |
| Tmc5              | 1.1605   | 2.62909  | 3.27503 |
| Dgke              | 1.15995  | 2.56683  | 3.27107 |
| Sec61a2           | 1.33422  | 2.01255  | 3.26656 |
| Ctgf              | 1.9353   | 1.74696  | 3.26534 |
| Rragd             | 1.64905  | 10.8864  | 3.26175 |
| Rtkn              | 2.06001  | 3.43581  | 3.25804 |
| Zfp618            | 2.14112  | 4.83179  | 3.25768 |
| Vsig10            | 1.66996  | 2.57284  | 3.25672 |
| Epha7             | 1.14909  | -1.32428 | 3.25042 |
| Fmn13             | 1.13825  | 2.39884  | 3.24639 |
| Phgdh             | 1.44927  | 5.75616  | 3.24527 |
| Pole2             | 3.40993  | 3.21874  | 3.24276 |
| Itga6             | 2.09885  | 7.94726  | 3.23693 |
| Stmn1             | 2.19093  | 3.65504  | 3.23132 |
| Rims2             | 2.13158  | 3.10722  | 3.23113 |
| Arhgap11a         | 1.8474   | 3.42247  | 3.22875 |
| Trim50            | 1.12815  | 1.00061  | 3.22841 |
| Gfpt2             | 1.05911  | 2.47068  | 3.22222 |
| Apobec3           | 1.33143  | 13.6147  | 3.21626 |
| Stmn1             | 2.2039   | 3.65171  | 3.214   |
| Numb1             | 1.42624  | 2.56243  | 3.21099 |
| Rictor            | 1.42497  | 1.85735  | 3.20773 |
| Mpz11             | 1.43162  | 3.30406  | 3.20468 |
| Rell1             | 1.80201  | 2.37196  | 3.2019  |
| Rybp              | 1.47197  | 2.71833  | 3.19489 |
| Tspan5            | 1.14389  | 3.57844  | 3.19162 |
| Fat1              | 1.47838  | 2.35104  | 3.18862 |
| Nrbp2             | 1.47467  | 2.68971  | 3.18454 |
| 2410089E03Ri<br>k | 1.5094   | 2.22155  | 3.18185 |
| Unc13b            | 3.03116  | 3.96099  | 3.18067 |
| Pkp1              | 1.42102  | 1.79892  | 3.16956 |
| Idua              | 1.7041   | 2.52041  | 3.16505 |
| Gpr153            | 1.10997  | 1.66547  | 3.16326 |
| Dnajc12           | 1.76252  | 4.7354   | 3.15167 |
| Slc8a3            | 1.06258  | 2.19543  | 3.13899 |
| Ptgfrn            | 2.21878  | 3.62003  | 3.13805 |
| Mum111            | 1.00911  | 1.68158  | 3.13725 |
| Mmp7              | -1.1142  | -1.12938 | 3.13255 |
| Grhl1             | 2.63475  | 2.06176  | 3.13136 |
| Fam84a            | 1.60596  | 1.64956  | 3.13067 |
| Prkx              | 1.71054  | 2.87214  | 3.13025 |
| Ptbp2             | 1.20041  | 1.44252  | 3.12633 |
| Slc44a3           | 1.89303  | 5.04391  | 3.12551 |
| Rasa2             | -1.06614 | 2.5915   | 3.11606 |

|                   |          |          |         |
|-------------------|----------|----------|---------|
| Zfp9              | 1.74462  | 3.64312  | 3.11546 |
| Fos               | 1.27432  | 1.60926  | 3.10977 |
| Slc1a2            | -2.23842 | -11.8737 | 3.10488 |
| Shroom3           | 1.89182  | 2.56313  | 3.10174 |
| Slc12a4           | 1.48837  | 2.45808  | 3.097   |
| Krt18             | 1.65374  | 3.84959  | 3.0962  |
| Rdh9              | -1.33459 | -1.39056 | 3.08999 |
| Rock2             | 1.0611   | 1.18219  | 3.08902 |
| Ttc3              | 1.4613   | 2.60865  | 3.08061 |
| Irs2              | -1.05254 | -1.3496  | 3.07847 |
| Ica1              | 2.26926  | 3.47368  | 3.07693 |
| Trim2             | 1.4329   | 2.55845  | 3.07602 |
| Cyp4f16           | 1.83697  | 3.56279  | 3.07528 |
| Sorbs2            | 1.76062  | 2.31093  | 3.06947 |
| Mrgprg            | -1.03128 | -1.11822 | 3.05733 |
| Gm10567           | 1.40646  | 4.68113  | 3.05429 |
| Eid1              | 1.28117  | 3.15226  | 3.05171 |
| Vcl               | 1.98027  | 3.01356  | 3.04936 |
| Gramd1a           | 1.07206  | 1.46803  | 3.04057 |
| Dmxl2             | 1.19991  | 1.65902  | 3.03558 |
| Sorl1             | 1.64714  | 2.92408  | 3.0352  |
| Eif2ak3           | 1.59102  | 2.69956  | 3.03238 |
| Net1              | 1.19313  | 1.58124  | 3.02838 |
| 1500012F01Ri<br>k | 1.40412  | 2.15192  | 3.02662 |
| Sox9              | 2.85455  | 4.75335  | 3.02587 |
| Hectd2            | 1.31606  | 2.43945  | 3.02412 |
| Rps6ka3           | 1.50258  | 3.35892  | 3.01453 |
| Cd44              | 1.12852  | 4.12731  | 3.00186 |
| Spink3            | 1.74215  | 25.108   | 2.11021 |
| Anxa13            | 1.52808  | 24.8867  | 1.47762 |
| Efcab3            | 1.32825  | 21.0875  | 2.514   |
| 5330417C22R<br>ik | 6.04037  | 15.9789  | 2.71617 |
| Spp1              | 4.52688  | 13.8923  | 1.3279  |
| Ace               | 1.30817  | 13.8728  | 1.83873 |
| Tmem54            | 6.51667  | 11.7996  | 1.8518  |
| Casp4             | 1.18383  | 11.4213  | 1.50064 |
| Cxcl17            | 1.15934  | 10.977   | 1.80099 |
| Capsl             | 1.97942  | 10.3305  | 1.40484 |
| Ttc9              | 1.01419  | 9.88011  | 2.42048 |
| Cdhr2             | 1.12499  | 9.65945  | 1.84515 |
| Ccl2              | 1.17915  | 9.64489  | 1.90195 |
| Chrm3             | 1.98663  | 8.98505  | 1.23318 |
| Ostb              | -1.02159 | 8.95724  | 1.53342 |
| 1600029D21R<br>ik | 3.76773  | 8.49085  | 2.12039 |
| Prelid2           | -1.20065 | 8.2288   | 2.10247 |

|                   |          |         |          |
|-------------------|----------|---------|----------|
| Tnnc1             | -1.05292 | 8.17795 | 1.90236  |
| Efemp2            | 1.25906  | 8.1605  | 2.33074  |
| Fam81a            | 4.50633  | 7.93508 | 2.56567  |
| Myo5c             | 2.11271  | 7.90076 | 2.94094  |
| Dhrs9             | 1.55742  | 7.55449 | 2.86769  |
| Ggt1              | 1.11244  | 7.36693 | 1.071    |
| Fam132a           | 1.11751  | 7.30009 | 1.10178  |
| C1ql3             | 1.17107  | 6.58114 | 1.35727  |
| Golm1             | 1.33781  | 6.5084  | 2.5038   |
| Cxcl14            | 1.65533  | 6.44427 | 1.51129  |
| Phlda2            | 2.57655  | 6.26793 | 1.83969  |
| Pla2g2e           | 6.43439  | 6.23701 | 2.02707  |
| 1810010H24R<br>ik | 2.35195  | 6.19891 | 2.24434  |
| Dram1             | 1.41744  | 5.96458 | 2.74477  |
| Atp1a2            | 1.16437  | 5.89202 | 1.23887  |
| Ccna2             | 4.08744  | 5.77959 | 2.9326   |
| Pcolce            | 2.53446  | 5.77224 | 2.74246  |
| Glipr2            | 1.04867  | 5.69497 | 1.17986  |
| Epcam             | 1.55748  | 5.6346  | 1.6268   |
| Sema5a            | 1.03488  | 5.62451 | 1.30229  |
| 2610524H06R<br>ik | 1.5817   | 5.39241 | 2.55282  |
| Elf3              | 1.46536  | 5.29875 | 2.24086  |
| Slc34a2           | 5.15466  | 5.21093 | 1.81462  |
| Vdr               | -1.10364 | 5.17244 | 1.10477  |
| Bglap2            | 1.77727  | 5.14621 | 2.22917  |
| Lrrc8b            | 1.64172  | 5.13372 | 2.71459  |
| Bcmo1             | 1.97528  | 5.0878  | 2.73642  |
| S100a8            | 1.06984  | 4.98835 | 1.20271  |
| Hmgcll1           | 1.06662  | 4.92671 | -1.03065 |
| Fkbp11            | 2.51529  | 4.90509 | 1.70659  |
| Mthfd2            | 1.1032   | 4.85179 | 1.72863  |
| Psph              | 1.27072  | 4.77745 | 2.88495  |
| Fam129a           | 1.06526  | 4.76712 | -1.59952 |
| Casp1             | -1.23351 | 4.71603 | -1.44746 |
| Sgce              | 3.14559  | 4.67378 | -1.67344 |
| Diap3             | 1.42102  | 4.61966 | 2.50718  |
| Lxn               | 1.20454  | 4.615   | -1.04486 |
| Enpp2             | 3.6119   | 4.60495 | 2.42676  |
| Srd5a2            | 3.32762  | 4.56317 | 1.70184  |
| Ccr2              | 1.30151  | 4.54444 | 1.30821  |
| Slamf9            | 1.20332  | 4.5419  | 1.96308  |
| Orai2             | 2.69404  | 4.48608 | 2.85138  |
| Sparc             | 1.9448   | 4.48549 | 2.18533  |
| Kcnj10            | 1.04966  | 4.44849 | -1.0689  |
| Slc23a3           | 1.20829  | 4.41989 | 2.45681  |
| Smpdl3b           | 2.23884  | 4.41703 | 1.90876  |



|               |          |         |          |
|---------------|----------|---------|----------|
| Sgpp2         | -1.00238 | 4.39923 | -1.05836 |
| Pgm1          | 1.71127  | 4.3876  | 2.79074  |
| Orai2         | 2.53544  | 4.36945 | 2.80993  |
| Crym          | 1.46569  | 4.36336 | 2.00062  |
| Hhipl2        | 1.9142   | 4.35012 | 1.48569  |
| Me2           | 1.66176  | 4.32252 | 1.62299  |
| Aldh18a1      | 2.38784  | 4.28523 | 2.76662  |
| Igf2bp3       | 2.33669  | 4.27645 | 1.75916  |
| Plscr1        | 1.46564  | 4.27564 | 1.94691  |
| Fry           | 1.20222  | 4.27259 | 1.67762  |
| Galns         | 4.22807  | 4.26263 | 1.40054  |
| Trpv4         | 2.26583  | 4.23127 | 1.39634  |
| Cyb561        | 1.49211  | 4.20753 | 1.26638  |
| Vcam1         | 1.45989  | 4.20603 | -1.32577 |
| Saa3          | 1.24202  | 4.20219 | -1.47618 |
| Ccnb2         | 3.10196  | 4.13368 | 2.50585  |
| Taf9b         | 2.17821  | 4.12318 | 2.97438  |
| Omp           | 3.8823   | 4.10505 | 2.6057   |
| Plscr1        | 1.37352  | 4.09517 | 1.9741   |
| Hk1           | 1.50563  | 4.06462 | 2.62097  |
| Ccdc68        | 1.55249  | 4.01235 | 2.30383  |
| Fam73a        | 1.1803   | 4.00687 | 2.2202   |
| Gm5246        | 1.66024  | 3.98459 | 2.95807  |
| Tnfaip8       | 1.28525  | 3.97753 | 2.79578  |
| Rap1gap       | 1.5564   | 3.97117 | 2.48443  |
| Prr15l        | 1.46584  | 3.9606  | 2.06629  |
| C130026l21Rik | 1.13374  | 3.95929 | 1.98223  |
| Igsf8         | 1.76647  | 3.92174 | 2.97377  |
| Nebi          | 1.17264  | 3.90445 | 1.2805   |
| Phlda3        | 1.2613   | 3.87755 | 2.42398  |
| Egr2          | 1.55594  | 3.87394 | 2.04193  |
| Ccnb1         | 2.97612  | 3.8552  | 2.86238  |
| Tmem165       | 1.74051  | 3.8543  | 2.44776  |
| Igk           | 2.20057  | 3.85046 | 1.36456  |
| Glis3         | 1.25814  | 3.8259  | 1.51958  |
| Tceal8        | 1.51805  | 3.81012 | 2.64423  |
| Loxl4         | 1.03293  | 3.77008 | 2.04249  |
| Osbpl3        | -1.15241 | 3.76693 | -1.1951  |
| Pglyrp1       | 1.09443  | 3.72904 | -1.06448 |
| A530040E14Rik | -1.04839 | 3.70954 | 1.88021  |
| Myo5a         | 1.17514  | 3.70345 | 2.25269  |
| Bcl2a1a       | 1.19188  | 3.68306 | 1.6418   |
| Scamp5        | 2.05986  | 3.67065 | 2.9913   |
| Slc7a11       | 1.00846  | 3.65972 | -1.01119 |
| Nupr1         | 1.42806  | 3.65767 | 1.3913   |
| LOC10004705   | 1.95632  | 3.62547 | 1.15185  |

|                   |          |         |          |
|-------------------|----------|---------|----------|
| 3                 |          |         |          |
| Fabp5             | 3.11716  | 3.6237  | 2.15344  |
| Sh3bgrl3          | 1.53659  | 3.62086 | 1.59473  |
| Plxna3            | 2.08604  | 3.61558 | 2.38622  |
| Sh3pxd2b          | 1.26232  | 3.58456 | 2.34945  |
| Dnajc10           | 1.68331  | 3.5784  | 2.51485  |
| Fabp5             | 3.13406  | 3.56731 | 2.13322  |
| Ptgr1             | 2.78586  | 3.55907 | 2.68079  |
| Scara3            | 1.04935  | 3.54333 | -1.10428 |
| Pfn2              | 1.53016  | 3.53074 | 2.12991  |
| Pdgfb             | 1.19982  | 3.52279 | 1.49362  |
| Serinc2           | -1.77821 | 3.52212 | -1.54283 |
| Vsig10l           | 1.21645  | 3.49795 | 2.57053  |
| Ccne1             | 1.91048  | 3.49768 | 1.99031  |
| Armcx3            | 2.90872  | 3.49536 | 2.99421  |
| Bub1              | 2.13788  | 3.48995 | 2.71733  |
| Ccl2              | 1.55567  | 3.48268 | 1.84293  |
| BC021614          | 3.64146  | 3.47997 | 2.23941  |
| Bcl2a1b           | 1.1627   | 3.47516 | 1.58958  |
| Rcan3             | 1.06628  | 3.47336 | 2.14719  |
| Rhoq              | -1.01568 | 3.46572 | 2.26019  |
| Bcl2a1d           | 1.16664  | 3.45036 | 1.60672  |
| Wdr67             | 3.02523  | 3.44967 | 2.18439  |
| Mphosph6          | 1.32693  | 3.43517 | 2.24593  |
| Krt8              | 1.69744  | 3.43237 | 2.83389  |
| Pold4             | 2.91824  | 3.42314 | 2.42459  |
| Aim2              | 1.35405  | 3.41258 | 2.96916  |
| Il10rb            | 1.66288  | 3.40541 | 2.86287  |
| Emb               | -1.04847 | 3.40079 | 1.35349  |
| Hmmr              | 1.80427  | 3.39959 | 2.47429  |
| Ms4a6d            | -1.09629 | 3.3976  | 2.50704  |
| Tceal5            | 1.11231  | 3.38893 | 1.94724  |
| Ms4a7             | 1.04557  | 3.388   | 1.62489  |
| Nol3              | 1.7378   | 3.3876  | 1.13019  |
| Pdgfa             | 2.32682  | 3.38694 | 2.72126  |
| Hbegf             | 1.57028  | 3.38424 | 2.96898  |
| A530040E14R<br>ik | -1.08433 | 3.38172 | 1.62231  |
| Timp3             | 1.54039  | 3.38018 | 2.19682  |
| Crtap             | 1.53212  | 3.37533 | 2.30667  |
| Clec5a            | 1.08813  | 3.37144 | 1.18641  |
| Ggct              | 1.89925  | 3.36009 | 1.94949  |
| Slc41a2           | 1.07073  | 3.35404 | 2.49805  |
| Scel              | 1.09913  | 3.31685 | 1.11478  |
| Socs2             | 3.23613  | 3.31477 | 1.73806  |
| Tmx3              | 1.76399  | 3.2994  | 2.8267   |
| Cacna1e           | 1.04119  | 3.29345 | 2.95121  |
| Top2a             | 2.37436  | 3.2838  | 2.55678  |

|                   |          |         |          |
|-------------------|----------|---------|----------|
| Arfgap3           | 1.50808  | 3.28281 | 2.74291  |
| Plaur             | 1.08563  | 3.27997 | 2.64468  |
| Cgref1            | 1.50038  | 3.27831 | 2.65368  |
| Gm6644            | 1.80848  | 3.2684  | 2.41882  |
| Adck4             | 1.96002  | 3.26354 | 2.17934  |
| Igf2as            | 1.01161  | 3.24165 | 2.53275  |
| 1700001L05Ri<br>k | 2.56244  | 3.24038 | 2.22092  |
| Mki67             | 2.56117  | 3.23646 | 2.37516  |
| Slc39a5           | -1.00316 | 3.21971 | -1.503   |
| Plce1             | 1.96075  | 3.2103  | 1.62738  |
| Slc6a1            | -1.02864 | 3.20528 | -1.0345  |
| Anxa5             | 1.91645  | 3.20169 | 2.63096  |
| Fam115a           | 1.96861  | 3.18837 | 2.71062  |
| Mcm6              | 1.56469  | 3.18724 | 2.35752  |
| Ms4a6c            | -1.03739 | 3.18283 | -1.18431 |
| Clca1             | 1.62671  | 3.18208 | 2.31844  |
| Gm6644            | 1.64396  | 3.17883 | 2.32851  |
| Ntn4              | 1.80781  | 3.17871 | 2.85914  |
| Adamts15          | 1.43394  | 3.17789 | 2.30529  |
| Cd14              | -1.09376 | 3.17474 | 1.4162   |
| Mad211            | 2.14406  | 3.16965 | 2.46802  |
| Twf2              | 1.34737  | 3.16602 | 2.43782  |
| Akr1b3            | 1.65854  | 3.16128 | 2.34594  |
| Clec4e            | 1.11912  | 3.15486 | -1.09039 |
| Ppap2c            | 1.96934  | 3.14494 | 2.48197  |
| Itgb8             | 1.09948  | 3.14482 | 2.11063  |
| Creb3l2           | 1.70993  | 3.14193 | 2.62378  |
| Fkbp1b            | 1.07616  | 3.11491 | 1.2946   |
| Rbl1              | 1.95357  | 3.10344 | 2.54574  |
| Mastl             | 1.75543  | 3.103   | 2.70817  |
| Tgfb2             | 1.18532  | 3.09199 | 1.61385  |
| Pdzk1ip1          | 1.37252  | 3.089   | 2.0875   |
| Sectm1a           | 3.06015  | 3.08658 | 2.72619  |
| Rgs10             | 1.05716  | 3.08426 | 1.03974  |
| St14              | 1.99359  | 3.07943 | 1.16966  |
| Cap2              | 1.11051  | 3.0788  | 1.0465   |
| Loxl4             | 1.04204  | 3.07572 | 1.96935  |
| Itgam             | 1.06706  | 3.07548 | 1.54883  |
| Defb1             | 3.6354   | 3.06475 | -1.1975  |
| Prkca             | 1.25244  | 3.06471 | 1.70521  |
| S100a9            | -1.12163 | 3.05589 | -1.04692 |
| Icam1             | 1.32205  | 3.0526  | 1.37369  |
| Hddc2             | 1.18037  | 3.0472  | 1.85751  |
| Prtn3             | 1.69182  | 3.04661 | 1.88714  |
| LOC641089         | 1.70355  | 3.04282 | 1.33423  |
| Ptpre             | 1.0753   | 3.04129 | -1.101   |
| Syt17             | 1.35914  | 3.0363  | 1.89104  |

|                   |         |          |          |
|-------------------|---------|----------|----------|
| Ano10             | 1.6292  | 3.03071  | 2.52269  |
| Capg              | 1.30511 | 3.01905  | 1.29904  |
| Casc5             | 1.9168  | 3.00925  | 2.37184  |
| Kctd17            | 1.8587  | 3.00923  | 2.82751  |
| Lgals3            | 1.12647 | 3.00285  | 2.76212  |
| Moxd1             | 10.1789 | -1.32923 | -1.36541 |
| Aldh3b2           | 6.249   | 1.81808  | 2.48684  |
| Cib3              | 3.65659 | 1.01836  | -1.48786 |
| S1pr3             | 3.64268 | -1.10253 | 1.55324  |
| 170005N04R<br>ik  | 3.40565 | 1.32253  | 1.73873  |
| Saa2              | 3.28328 | 1.55833  | -12.2829 |
| Mmp12             | 3.26368 | 2.00449  | 2.72542  |
| Spint1            | 2.99066 | 1.70505  | 1.53346  |
| Saa1              | 2.9618  | 1.72521  | -7.32979 |
| Itih5             | 2.68729 | 1.80806  | 1.30103  |
| Armcx3            | 2.52167 | 2.84036  | 2.58994  |
| Grem2             | 2.49187 | 1.41648  | 2.88383  |
| Enpp1             | 2.48106 | 2.52511  | 2.8159   |
| Rtn4r             | 2.4797  | 2.30145  | 2.31414  |
| Clec2h            | 2.45858 | -3.42541 | -3.81134 |
| Tbc1d30           | 2.45793 | 1.25933  | 1.62007  |
| Oxa1l             | 2.45037 | 2.79106  | 1.90967  |
| Slco1a1           | 2.44495 | -11.662  | -18.6103 |
| Gcnt4             | 2.43628 | 2.04704  | 1.9599   |
| Cyb5r1            | 2.4297  | 2.72665  | 2.54919  |
| Eil3              | 2.41396 | 2.33965  | 1.86406  |
| A730020M07<br>Rik | 2.38347 | 2.34428  | 1.10075  |
| Prc1              | 2.37678 | 2.95884  | 2.67791  |
| Slc20a1           | 2.33606 | 2.31441  | 2.71006  |
| Klhdc1            | 2.32102 | 2.06971  | 2.42284  |
| P2rx4             | 2.30419 | 1.88809  | 1.5335   |
| Armcx3            | 2.29455 | 2.83335  | 2.44257  |
| Plk1              | 2.27603 | 2.94695  | 2.03622  |
| Rasa1             | 2.26929 | 2.88154  | 2.49242  |
| Sh2d4a            | 2.23222 | 2.61771  | 2.9368   |
| Gpr155            | 2.20814 | 2.77934  | 2.31898  |
| Il17rb            | 2.20666 | 2.17153  | 1.4719   |
| Rnf39             | 2.1941  | 1.57018  | 1.65306  |
| 170005N04R<br>ik  | 2.1885  | 1.14036  | 1.24762  |
| Plek2             | 2.18058 | 2.60649  | 2.43095  |
| Rrm2              | 2.13227 | 1.43612  | 1.64964  |
| Ifi44             | 2.13133 | -1.17783 | -1.54006 |
| Ppif              | 2.11272 | 1.99276  | 1.18063  |
| Soat2             | 2.10889 | 1.37261  | 1.24394  |
| Rxfp3             | 2.10146 | 1.24178  | -1.02996 |

|               |          |          |          |
|---------------|----------|----------|----------|
| Socs2         | 2.10145  | 2.10983  | 1.35845  |
| Rrbp1         | 2.0868   | 2.00107  | 1.38365  |
| Rdh5          | 2.07683  | -1.07817 | -1.51488 |
| Hist1h2ak     | 2.07012  | 2.14429  | 2.15846  |
| D630045J12Rik | 2.06044  | 2.17122  | 2.579    |
| Pion          | 2.05146  | 1.23434  | 1.04655  |
| Hsd17b14      | 2.04953  | 2.65733  | 1.15479  |
| Greb1l        | 2.04797  | 2.46443  | 2.8135   |
| Krt23         | 2.03758  | 1.65799  | -2.28933 |
| Slc43a1       | 2.03293  | 1.74055  | 1.52668  |
| Foxq1         | 2.02584  | 1.1375   | 1.12775  |
| Pla2g12a      | 2.02473  | 1.78646  | 2.7399   |
| C8a           | 2.0195   | 1.14904  | -7.6401  |
| Osgin1        | 2.00456  | 2.54878  | 2.30068  |
| Mup3          | -1.11015 | -15.3342 | -157.691 |
| Es31          | 1.0501   | -43.9168 | -103.465 |
| 2810007J24Rik | -1.71609 | -75.4588 | -98.8299 |
| C9            | -1.2022  | -4.11377 | -89.9319 |
| Gm4738        | 1.05     | -61.7125 | -70.2064 |
| Ugt2b1        | -1.56119 | -35.5483 | -67.5393 |
| Orm1          | -1.40025 | -2.90536 | -62.9089 |
| Ugt3a1        | -2.17244 | -16.7324 | -62.6456 |
| Thrsp         | -2.54556 | -29.6304 | -51.3951 |
| Elovl3        | -4.80674 | -36.6054 | -43.5567 |
| Cyp2j5        | -1.55223 | -2.10773 | -42.2503 |
| Keg1          | -1.03658 | -13.4054 | -41.9946 |
| Hpd           | -1.28824 | -14.2161 | -39.935  |
| Gls2          | -1.55575 | -10.6788 | -39.2034 |
| Cmah          | -1.10026 | -16.2912 | -37.9393 |
| Aass          | -1.54603 | -7.70864 | -37.1446 |
| Mfsd2a        | -5.36553 | -37.0946 | -33.9815 |
| Inhbe         | -3.95926 | -8.62856 | -31.5856 |
| Mme           | -4.59979 | -7.50045 | -30.168  |
| Cyp2f2        | -1.03224 | -6.19571 | -29.8694 |
| Agxt          | -1.31939 | -8.27962 | -28.5971 |
| Sucnr1        | -4.83961 | -20.6001 | -26.9794 |
| Abat          | -1.58125 | -4.34325 | -26.9604 |
| Raet1d        | -3.44794 | -3.10377 | -26.5803 |
| Hsd3b5        | 1.28639  | -21.5509 | -24.9099 |
| Tdo2          | -1.21118 | -4.58523 | -21.2744 |
| Mup21         | -1.49235 | -18.9458 | -21.0496 |
| Cyp4a14       | -21.9139 | -96.1473 | -20.321  |
| Otc           | -1.18503 | -5.7384  | -19.9687 |
| Serpina4-ps1  | 1.77426  | -15.5098 | -19.8463 |
| 0610012H03Rik | -2.11215 | -10.0672 | -19.3012 |

|                   |          |          |          |
|-------------------|----------|----------|----------|
| Slco1a1           | 2.44495  | -11.662  | -18.6103 |
| Orm2              | -1.25843 | 1.4124   | -18.4547 |
| Ces1              | -1.52999 | -8.57218 | -18.2617 |
| Mbl1              | -1.89171 | -4.72049 | -17.8056 |
| C730048C13R<br>ik | -1.86867 | -19.5842 | -17.7807 |
| Acss3             | -7.02517 | -18.9085 | -17.6883 |
| Sdr9c7            | -1.9051  | -12.7519 | -17.4906 |
| Ido2              | -1.26205 | -5.03804 | -17.0566 |
| Mosc1             | -1.30738 | -5.52151 | -16.9653 |
| Cyp2c54           | -1.78193 | -21.775  | -16.9421 |
| Apol7a            | -2.27131 | -8.2697  | -16.9009 |
| Car5a             | -2.12968 | -10.8953 | -16.7914 |
| Fitm1             | -3.88508 | -6.96551 | -16.5896 |
| Cpamd8            | 1.30467  | -2.19678 | -16.5526 |
| Pck1              | -1.07902 | -22.8687 | -16.4268 |
| Rdh16             | -4.50553 | -14.8319 | -16.3016 |
| Aadat             | -1.24916 | -6.10411 | -16.2675 |
| Al317395          | -1.844   | -10.7372 | -16.2476 |
| Es22              | -1.96956 | -13.5656 | -16.2051 |
| Apon              | -1.28706 | -7.1608  | -16.0734 |
| Car1              | -1.42439 | -11.2627 | -14.7245 |
| Apoa5             | -1.2748  | -22.3583 | -14.6832 |
| C6                | 1.24998  | -3.89536 | -14.4614 |
| Gldc              | -1.60604 | -1.35992 | -14.3985 |
| Mup1              | -1.28606 | -5.63123 | -14.1978 |
| Gnmt              | -1.53377 | -6.2445  | -14.1598 |
| 5033411D12R<br>ik | -2.75522 | -12.4882 | -14.0102 |
| Haoa              | -1.36658 | -4.11217 | -13.8036 |
| Sds               | -1.07852 | -3.09316 | -13.5563 |
| Igf1              | -1.05471 | -4.04717 | -13.5554 |
| Slco2b1           | -2.04209 | -11.6884 | -13.4627 |
| Nnmt              | -1.89581 | -7.85771 | -13.3646 |
| Nudt7             | -1.47731 | -8.49655 | -13.0738 |
| Cml2              | -1.2038  | -4.80235 | -13.0582 |
| Gm4952            | -2.14332 | -8.94567 | -12.6285 |
| Gm5631            | -1.66223 | -14.1673 | -12.5655 |
| Slc3a1            | -1.33239 | -2.57254 | -12.4926 |
| Suox              | -3.00183 | -11.7857 | -12.4475 |
| Cd5l              | -1.10284 | -11.2692 | -12.3296 |
| Saa2              | 3.28328  | 1.55833  | -12.2829 |
| Prhoxnb           | 1.11371  | -6.67979 | -12.267  |
| Vsig4             | -1.26075 | -18.0069 | -11.9548 |
| Hal               | -1.09034 | -3.15051 | -11.807  |
| Lipg              | -3.77272 | -10.9928 | -11.6918 |
| Gabbr2            | -2.17032 | -9.40358 | -11.6512 |
| Mettl7b           | -1.80643 | -9.86267 | -11.53   |

|                   |          |          |          |
|-------------------|----------|----------|----------|
| Paqr9             | -3.21697 | -5.84537 | -11.3163 |
| Mup2              | -1.16274 | -4.84824 | -11.2474 |
| Necab1            | -1.32548 | -2.75222 | -11.0949 |
| Mup2              | -1.15778 | -4.38893 | -11.0431 |
| Afmid             | -1.3562  | -4.21059 | -10.918  |
| Hsd3b2            | -1.46149 | -9.90673 | -10.7892 |
| Mup2              | -1.16625 | -4.12174 | -10.669  |
| Cyp2c50           | -2.0156  | -33.9755 | -10.447  |
| Abcc3             | -2.87789 | -3.26587 | -10.4455 |
| Mmd2              | -3.03719 | -9.49965 | -10.3618 |
| Kynu              | -1.37385 | -2.74381 | -10.3611 |
| 1100001G20R<br>ik | -1.95094 | -5.44181 | -10.3537 |
| Inmt              | -1.1847  | -13.246  | -10.3374 |
| Mup20             | 1.02378  | -5.37217 | -10.3266 |
| Mup2              | -1.13171 | -3.91142 | -10.3211 |
| Mup11             | -1.13796 | -3.86879 | -10.2665 |
| Gpt               | -1.64908 | -6.26284 | -10.2532 |
| Cml1              | -1.29892 | -6.62895 | -10.1202 |
| Cyp7b1            | -1.41707 | -10.6268 | -10.1071 |
| Mup2              | -1.14146 | -3.89079 | -10.0075 |
| Cth               | -1.91632 | -5.7366  | -9.93078 |
| Srd5a1            | -1.4045  | -8.93    | -9.78695 |
| Mup7              | -1.12391 | -3.75244 | -9.74784 |
| Oat               | -5.92246 | -22.6358 | -9.70971 |
| Mup2              | -1.16189 | -3.84912 | -9.70537 |
| Slc17a3           | -1.35064 | -7.31021 | -9.46844 |
| Inhbc             | -1.3612  | -5.18181 | -9.37025 |
| Adh4              | -1.77119 | -16.1485 | -9.2961  |
| Timd2             | -1.33887 | -1.20453 | -9.20665 |
| Pecr              | -1.69276 | -5.94883 | -9.19134 |
| Aspg              | -1.05834 | -3.39414 | -9.15901 |
| Cpamd8            | 1.33396  | -1.92016 | -9.09026 |
| Bdh2              | -1.74684 | -4.57917 | -8.96919 |
| 9030619P08R<br>ik | -4.56011 | -6.05066 | -8.89656 |
| Pigr              | -1.11047 | -1.48085 | -8.81636 |
| Aldh1b1           | 1.21789  | -1.01257 | -8.77212 |
| Dio1              | 1.01815  | -3.82633 | -8.45206 |
| Alas2             | -1.40934 | -6.03665 | -8.44277 |
| Gm10319           | 1.19009  | -3.11377 | -8.36454 |
| Cyp4f14           | -1.17041 | -6.76403 | -8.33253 |
| Adh6-ps1          | -1.52557 | -6.20738 | -8.22623 |
| Cmb1              | -2.42346 | -6.13371 | -8.15372 |
| Kcnn2             | -1.15286 | -3.51888 | -8.04663 |
| Retsat            | -2.2326  | -8.05765 | -7.97023 |
| Colec10           | -1.32594 | -6.20915 | -7.90007 |
| Lrtm1             | -3.62256 | -6.4635  | -7.85773 |

|                   |          |          |          |
|-------------------|----------|----------|----------|
| Ugt2a3            | -1.01344 | -6.66153 | -7.84136 |
| Clec4g            | -1.02713 | -12.26   | -7.80369 |
| Nr0b2             | -2.19047 | -6.50435 | -7.7609  |
| Il1rap            | -1.19669 | -3.31126 | -7.72681 |
| Dnase1l3          | -1.0062  | -11.1212 | -7.71302 |
| Acacb             | -3.45201 | -7.04275 | -7.68048 |
| C8a               | 2.0195   | 1.14904  | -7.6401  |
| G0s2              | -4.87552 | -6.78983 | -7.52262 |
| Fabp2             | -3.00165 | -4.18347 | -7.49922 |
| Gm11437           | 1.31317  | -2.72026 | -7.48863 |
| Fabp7             | -1.3836  | -4.67933 | -7.4461  |
| Cyp3a25           | -1.32782 | -16.603  | -7.34989 |
| Saa1              | 2.9618   | 1.72521  | -7.32979 |
| Lin7a             | -1.0802  | -4.17454 | -7.30125 |
| Hacl1             | -2.75982 | -6.93443 | -7.28028 |
| Cyp8b1            | -1.0859  | -10.2421 | -7.27562 |
| Hsd11b1           | -1.00933 | -1.26223 | -7.25082 |
| Scnn1a            | -1.65292 | -7.61573 | -7.22721 |
| Acaa1b            | -3.85477 | -12.6024 | -7.22487 |
| Mrap              | -2.47146 | -2.55374 | -7.19999 |
| Cml5              | -3.57228 | -6.36918 | -7.18705 |
| Arg1              | -1.13738 | -2.81897 | -7.17322 |
| Dhtkd1            | -1.49945 | -4.18304 | -7.13582 |
| Mafb              | -1.36729 | -3.87566 | -7.12085 |
| Clec4f            | -1.27002 | -6.34448 | -7.10423 |
| Cyp2d13           | -1.30641 | -16.7338 | -7.06523 |
| Ugt2b5            | -1.88056 | -3.57196 | -7.06369 |
| Cryl1             | -2.34354 | -3.86503 | -7.05897 |
| Fam169b           | -1.38417 | -2.84496 | -7.02883 |
| Akr1d1            | -1.53051 | -3.42651 | -7.01328 |
| Serpina12         | 1.20013  | -5.15442 | -7.00781 |
| Igfals            | -1.43251 | -8.81117 | -7.00091 |
| Rab30             | -3.84505 | -4.83941 | -7.00052 |
| Aqp8              | -1.7978  | -1.95646 | -6.99782 |
| Srr               | -1.84354 | -4.10753 | -6.98424 |
| 9130409123Ri<br>k | -4.23513 | -9.95838 | -6.80093 |
| Aldh1l1           | -1.45385 | -4.2464  | -6.75994 |
| Ppm1k             | -1.62897 | -5.35081 | -6.69443 |
| G6pc              | -1.63402 | -17.6032 | -6.51916 |
| Chpt1             | -2.02346 | -4.39622 | -6.50325 |
| Serpina3k         | 1.13395  | -2.55861 | -6.46389 |
| Kmo               | -1.16986 | -4.95369 | -6.38803 |
| Prodh             | -2.21316 | -11.639  | -6.3699  |
| Hamp2             | -1.76689 | -5.27018 | -6.35254 |
| Homer2            | 1.13877  | -1.48292 | -6.30163 |
| Fam47e            | -1.50392 | -3.55146 | -6.28961 |
| BC025446          | -1.37634 | -2.42126 | -6.27345 |



|                   |          |          |          |
|-------------------|----------|----------|----------|
| B3galt1           | 1.12581  | -2.81089 | -6.13665 |
| Hamp              | -1.26832 | -24.1181 | -6.13549 |
| Ftcd              | 1.11676  | -1.81617 | -6.08681 |
| EG634650          | -2.3852  | -5.25771 | -6.03805 |
| Sult1b1           | -1.61996 | -3.91073 | -6.02001 |
| Fbp1              | -1.07119 | -5.00115 | -6.01544 |
| Tmem86b           | -1.483   | -8.45605 | -6.00275 |
| 1600002H07R<br>ik | -1.66928 | -5.1168  | -5.99968 |
| Gck               | -1.38214 | -2.38643 | -5.96526 |
| Abhd3             | -1.54951 | -2.90761 | -5.91988 |
| Acot3             | -5.52272 | -4.51507 | -5.91724 |
| Hao1              | -1.28158 | -3.11352 | -5.90589 |
| Phlda1            | -1.4376  | -5.15687 | -5.89229 |
| Gstk1             | -1.83929 | -4.64643 | -5.8797  |
| Pcca              | -1.65318 | -3.42339 | -5.87969 |
| Orm3              | -1.13428 | -3.10796 | -5.80044 |
| Agxt211           | -1.74237 | -4.99322 | -5.76511 |
| Plk3              | -2.08115 | -4.01634 | -5.73913 |
| Saa4              | -1.09347 | -2.20135 | -5.72117 |
| Dpys              | -1.42142 | -6.41305 | -5.69942 |
| Cd1d1             | -2.41564 | -4.14867 | -5.69659 |
| Abcg2             | -1.3257  | -1.02163 | -5.68884 |
| Nox4              | 1.2092   | -6.41725 | -5.68698 |
| G630090E17R<br>ik | -1.96941 | -3.91026 | -5.67129 |
| Cd36              | -2.27891 | -6.67352 | -5.66766 |
| Pctp              | -1.67806 | -2.2789  | -5.65141 |
| P2ry1             | -2.23172 | -5.72457 | -5.54324 |
| Bhmt              | -1.1372  | -3.57486 | -5.48603 |
| Slc25a25          | -3.80925 | -7.41919 | -5.45129 |
| Adhfe1            | -1.55055 | -6.3303  | -5.43054 |
| Bhmt              | -1.12138 | -3.56756 | -5.42256 |
| Shpk              | -1.46804 | -4.39133 | -5.42171 |
| Cyp3a41b          | -3.27903 | -26.9751 | -5.41328 |
| Sfxn5             | -1.67171 | -3.72065 | -5.39756 |
| Ctsc              | -1.57957 | -1.47052 | -5.39037 |
| Plekhb1           | -1.7152  | -3.13146 | -5.38499 |
| lvd               | -1.54548 | -3.75063 | -5.37084 |
| Ugt2b37           | -1.81825 | -3.86291 | -5.36846 |
| Rxrg              | -1.81179 | -4.94594 | -5.35184 |
| C8g               | -1.28044 | -4.02898 | -5.34405 |
| Pdk1              | -2.00696 | -5.94228 | -5.2902  |
| Cyp3a41a          | -3.58855 | -25.9924 | -5.27839 |
| Ugt2b38           | -1.46807 | -3.43903 | -5.23031 |
| S1pr5             | -1.7785  | -3.92397 | -5.22885 |
| Gchfr             | -1.93945 | -2.77263 | -5.21816 |
| 3110049J23Ri      | -1.8402  | -4.89478 | -5.21592 |

|          |          |          |          |
|----------|----------|----------|----------|
| k        |          |          |          |
| Ugt3a1   | -1.10469 | -1.60575 | -5.19415 |
| Hrg      | 1.09527  | -1.54571 | -5.18667 |
| Cyp2d26  | -1.15244 | -1.70992 | -5.14094 |
| Folr2    | -1.38305 | -5.0362  | -5.14032 |
| Ifit3    | -1.26721 | -3.6823  | -5.11366 |
| Apol9a   | -1.20157 | -4.73671 | -5.11097 |
| Mpv17l   | -1.29628 | -3.46828 | -5.08822 |
| Fn3k     | -1.48856 | -4.23462 | -5.07608 |
| Apol9b   | -1.18036 | -4.94808 | -5.05962 |
| Rtp3     | 1.05893  | -2.49024 | -5.02734 |
| Acsm1    | -1.13241 | -3.64718 | -5.02604 |
| Aldh8a1  | -1.01137 | -2.54531 | -5.02545 |
| Ugt3a1   | -1.11024 | -1.62039 | -5.02077 |
| Olfm3    | -2.21688 | -4.56464 | -5.01236 |
| Slc2a2   | -1.26548 | -5.28796 | -4.98642 |
| Al132487 | -1.50354 | -5.08714 | -4.97783 |
| Slc22a7  | 1.4979   | -1.19862 | -4.97008 |
| Gckr     | -1.17632 | -2.39361 | -4.95269 |
| Slc15a5  | -2.37352 | -5.0274  | -4.94546 |
| Mbl2     | -1.40877 | -5.66878 | -4.94366 |
| Hsd17b6  | 1.59512  | -12.9126 | -4.90067 |
| Cfhr1    | -1.19745 | -2.49968 | -4.86041 |
| Dmgdh    | -1.38198 | -5.3579  | -4.85634 |
| Asgr2    | -1.12003 | -2.59527 | -4.84701 |
| Plxnc1   | -1.22574 | -4.47283 | -4.83712 |
| Dpyd     | -1.6416  | -6.90364 | -4.79101 |
| Trhde    | -2.51141 | -4.16622 | -4.78686 |
| Slc30a10 | -2.66675 | -4.1149  | -4.78067 |
| Homer2   | 1.18512  | -1.86765 | -4.76802 |
| Sult5a1  | -1.40684 | -3.55806 | -4.75385 |
| Extl1    | -2.74446 | -3.58057 | -4.74051 |
| Emr4     | -1.37582 | -2.56448 | -4.73662 |
| Slc23a1  | 1.10144  | -2.29857 | -4.72495 |
| Agphd1   | -1.021   | -4.10508 | -4.70228 |
| Creb3l3  | -1.36624 | -4.30992 | -4.70028 |
| Pxmp2    | -1.23199 | -3.30367 | -4.68994 |
| Cyp2u1   | 1.16223  | -3.57335 | -4.66534 |
| Pltp     | -1.50948 | -3.16494 | -4.65294 |
| Stap1    | -2.43858 | -2.17465 | -4.5955  |
| Acss2    | -1.8686  | -5.07216 | -4.58759 |
| Fgf1     | -1.46146 | -4.27571 | -4.58621 |
| Adra1b   | -1.61139 | -4.17375 | -4.57078 |
| Tymp     | -1.67179 | -3.29985 | -4.5574  |
| Ces6     | -1.21885 | -4.18065 | -4.54184 |
| Gm4324   | -2.92733 | -2.75887 | -4.51266 |
| Gjb2     | -1.40106 | -1.76491 | -4.50428 |
| Sec14l2  | -1.53955 | -3.5135  | -4.50238 |

|                   |          |          |          |
|-------------------|----------|----------|----------|
| Gas2              | -1.70786 | -2.53324 | -4.49676 |
| Acat1             | -1.20216 | -2.49141 | -4.47737 |
| Cyp1a2            | -1.90936 | -27.7768 | -4.4666  |
| Ttc7b             | -2.13393 | -4.47609 | -4.46483 |
| Nlrp6             | 1.08899  | -2.24072 | -4.45341 |
| Cfhr3             | -1.54444 | -2.61827 | -4.44804 |
| Ehd3              | -1.07428 | -4.85583 | -4.44661 |
| ErbB4             | -1.73262 | -4.24598 | -4.44596 |
| Cd59b             | -1.39831 | -2.24689 | -4.4384  |
| Uroc1             | -1.12385 | -1.7955  | -4.42725 |
| Aadac             | -1.09064 | -2.05638 | -4.42367 |
| Gjb2              | -1.51718 | -1.85331 | -4.412   |
| Leap2             | -3.52897 | -3.13493 | -4.40101 |
| Cabc1             | -1.78498 | -4.54256 | -4.39048 |
| Klk1b4            | 1.22295  | -1.70178 | -4.38147 |
| Ildr2             | -2.84134 | -4.36858 | -4.37621 |
| Fcna              | -1.5428  | -4.46352 | -4.37318 |
| Hsd3b3            | 1.13277  | -7.77103 | -4.36084 |
| 1810046K07R<br>ik | -1.92192 | -2.65043 | -4.34498 |
| Cebpa             | -1.44435 | -2.97423 | -4.31475 |
| Ghr               | -1.17818 | -2.44635 | -4.31343 |
| Hopx              | -1.10229 | -2.16508 | -4.31175 |
| Sntg2             | -1.42657 | -4.08787 | -4.30714 |
| Pon1              | -1.34055 | -16.3822 | -4.30702 |
| Ptpn9             | -1.38263 | -2.47173 | -4.2968  |
| Gna14             | -1.78309 | -4.67983 | -4.29223 |
| Upp2              | 1.39062  | -10.5673 | -4.29061 |
| Sec14l4           | -1.16738 | -3.69522 | -4.28612 |
| Serping1          | 1.01747  | -1.52114 | -4.2738  |
| Slc10a1           | -1.06592 | -4.49048 | -4.26528 |
| Gsta2             | -2.63733 | -1.22325 | -4.24846 |
| Cyp2c44           | 1.19465  | -3.66512 | -4.19307 |
| Paox              | -2.24606 | -3.36117 | -4.13983 |
| Prg4              | -1.17924 | -1.21449 | -4.13927 |
| Gsta1             | -2.72338 | -1.02194 | -4.13663 |
| Clec1b            | -1.1111  | -4.22881 | -4.12517 |
| Olfml1            | -1.24275 | -1.68825 | -4.12427 |
| Baat              | -1.26892 | -3.66373 | -4.12153 |
| Oit3              | 1.20571  | -5.41534 | -4.10126 |
| Slc2a5            | 1.50317  | -1.29828 | -4.07911 |
| Gsta1             | -2.66252 | -1.00794 | -4.06671 |
| Adssl1            | -1.9208  | -3.66933 | -4.05695 |
| Nit2              | -1.29808 | -2.47125 | -4.05677 |
| Adipor2           | -2.09861 | -4.63916 | -4.05368 |
| F8                | 1.29099  | -2.40957 | -4.04313 |
| Enpp3             | 1.18289  | -2.13524 | -4.00412 |
| Car3              | -1.11176 | -4.77301 | -3.99709 |

|                   |          |          |          |
|-------------------|----------|----------|----------|
| Aldh9a1           | -1.26104 | -3.02208 | -3.96882 |
| Vipr1             | -1.59194 | -4.95215 | -3.96391 |
| Tm7sf2            | -1.63493 | -3.73336 | -3.96124 |
| 9030617003R<br>ik | -1.26303 | -3.43941 | -3.94623 |
| Gm10639           | -2.67972 | -1.1723  | -3.93621 |
| Cd300ld           | -1.1495  | -2.77072 | -3.93146 |
| Ccl9              | 1.29335  | 1.37373  | -3.91982 |
| Timd4             | -1.29316 | -3.15083 | -3.89426 |
| Acsm5             | -1.00067 | -3.65684 | -3.89381 |
| Slc26a1           | -1.10772 | -3.24767 | -3.88908 |
| Aacs              | -1.77588 | -4.71762 | -3.87834 |
| Emr1              | -1.30434 | -1.44963 | -3.86887 |
| Bphl              | -1.54616 | -3.78482 | -3.85151 |
| Slc27a5           | -1.24428 | -6.75714 | -3.85048 |
| Ces5              | -1.0863  | -1.71872 | -3.84964 |
| Slc46a1           | -1.36048 | -2.3473  | -3.82926 |
| Cd163             | -1.44765 | -3.42023 | -3.82844 |
| Bmp2              | -1.11733 | -6.54132 | -3.82771 |
| Clcn2             | -1.66742 | -3.90209 | -3.81914 |
| Clec2h            | 2.45858  | -3.42541 | -3.81134 |
| Amdhd1            | 1.03441  | -2.4251  | -3.81102 |
| Apof              | -1.15722 | -1.83222 | -3.80543 |
| Hes6              | -1.91895 | -2.60958 | -3.80311 |
| Mocs1             | -1.44076 | -2.7681  | -3.79305 |
| Serpinf1          | 1.00206  | -1.30498 | -3.7764  |
| Ifit1             | -1.28928 | -2.82997 | -3.77304 |
| Ugt3a2            | -1.00862 | -1.66907 | -3.76706 |
| Gcdh              | -1.65548 | -3.85305 | -3.76627 |
| Slc25a15          | -1.60072 | -2.38896 | -3.74951 |
| Gm14403           | -1.27141 | -3.89073 | -3.7383  |
| Rtp3              | -1.00339 | -3.0086  | -3.73654 |
| Cd55              | -1.01659 | -4.55418 | -3.7174  |
| Trem14            | -1.11655 | -2.73188 | -3.71737 |
| Qdpr              | -1.6838  | -2.55465 | -3.71004 |
| Dcxr              | -1.63565 | -2.86578 | -3.70966 |
| Cyp3a25           | -1.42315 | -9.97165 | -3.70276 |
| Atrnl1            | -1.16491 | -2.8665  | -3.6975  |
| 5830473C10R<br>ik | 1.59026  | -2.17043 | -3.69329 |
| Rmnd1             | -1.63341 | -2.52988 | -3.67949 |
| Gsto1             | -1.45511 | -2.39944 | -3.67852 |
| Cpt2              | -1.72979 | -2.92319 | -3.67031 |
| Cxcl12            | -1.1436  | -2.3224  | -3.66387 |
| Glyat             | -1.34774 | -2.39553 | -3.66343 |
| Gbp6              | 1.14895  | -2.07078 | -3.64785 |
| Akr1c14           | -1.22306 | -3.96877 | -3.63303 |
| Slc25a23          | -1.33945 | -2.46376 | -3.63224 |

|                   |          |          |          |
|-------------------|----------|----------|----------|
| Itih1             | 1.30416  | -1.94677 | -3.61524 |
| Cyp2d40           | -1.31956 | -4.49099 | -3.60361 |
| Paqr3             | -1.63213 | -1.63183 | -3.5925  |
| Mgmt              | -1.66097 | -1.52846 | -3.58962 |
| Cxcl9             | 1.4611   | 1.91494  | -3.56955 |
| Ankrd33b          | -1.28974 | -2.64962 | -3.5635  |
| Paox              | -1.87683 | -2.78682 | -3.55838 |
| Syde2             | -1.55148 | -3.03928 | -3.55813 |
| Slc6a12           | -1.09777 | -3.41716 | -3.55409 |
| Gm5512            | -1.64533 | -2.59292 | -3.54369 |
| Slc25a21          | -1.38967 | -8.12582 | -3.53673 |
| Phyhd1            | -1.2419  | -2.62972 | -3.52092 |
| Mgl1              | -2.07791 | -6.13178 | -3.50832 |
| Mug-ps1           | 1.28346  | -1.36896 | -3.50712 |
| Mup5              | -1.22372 | -2.42908 | -3.49699 |
| DOH4S114          | -1.08885 | -1.68125 | -3.49697 |
| Ehhadh            | -1.63503 | -3.19164 | -3.49231 |
| Cyp3a44           | -2.59327 | -11.2937 | -3.48843 |
| Mpa2l             | -1.41745 | -2.75724 | -3.48742 |
| Acat3             | -1.22997 | -1.73577 | -3.48729 |
| Nat8              | -1.57698 | -1.055   | -3.48493 |
| Gstt3             | -2.12279 | -3.72897 | -3.47132 |
| Ephx2             | -1.60676 | -3.80567 | -3.46121 |
| Afm               | -1.02129 | -1.99453 | -3.46106 |
| Mccc1             | -1.69305 | -2.84104 | -3.4524  |
| F7                | 1.21229  | -2.32356 | -3.44969 |
| Ccbl1             | -1.05838 | -2.70872 | -3.43623 |
| Hrsp12            | -1.2958  | -1.30316 | -3.426   |
| Cfp               | -1.15327 | -2.73735 | -3.42404 |
| Abhd15            | -1.7832  | -3.83188 | -3.41497 |
| Tmem53            | 1.01173  | -1.69293 | -3.41415 |
| Acad11            | -1.28943 | -3.18548 | -3.41374 |
| Slc17a8           | -2.15163 | -4.30868 | -3.41189 |
| Csrp3             | -1.23274 | -3.51741 | -3.4098  |
| Cbs               | -1.27873 | -2.50065 | -3.40721 |
| Gm4951            | -1.08268 | -2.74216 | -3.40497 |
| Chac2             | -1.36952 | -1.6532  | -3.4037  |
| Slc39a8           | -1.30619 | -2.66041 | -3.40245 |
| Ass1              | -1.1553  | -2.16442 | -3.39653 |
| Mrc1              | 1.11199  | -3.45834 | -3.39323 |
| Pde7b             | -1.37503 | -4.41488 | -3.39166 |
| Ass1              | -1.15833 | -2.17371 | -3.38051 |
| 1700001C19R<br>ik | -1.02287 | -3.14456 | -3.37093 |
| Bhmt2             | -1.15469 | -2.3696  | -3.36261 |
| Echdc3            | -1.2554  | -2.09399 | -3.35938 |
| 0610008F07Ri<br>k | -1.60168 | -2.78556 | -3.35604 |

|                   |          |          |          |
|-------------------|----------|----------|----------|
| Gatm              | 1.09013  | -1.31496 | -3.34899 |
| Il1a              | -1.12039 | -3.15743 | -3.33466 |
| Ppp1r3b           | -1.45511 | -2.49495 | -3.33312 |
| Glyctk            | -1.37495 | -2.66014 | -3.32673 |
| Sms               | -1.52063 | -2.22998 | -3.31602 |
| Aspdh             | -1.01086 | -2.59338 | -3.31167 |
| Acsm3             | -1.43507 | -1.6418  | -3.29984 |
| Bdh1              | -1.38127 | -3.36739 | -3.29652 |
| Bco2              | -1.51382 | -5.0725  | -3.29577 |
| 2610029I01Ri<br>k | -1.07829 | -1.56208 | -3.28969 |
| Uox               | -1.05932 | -2.01806 | -3.28649 |
| Agmat             | -1.47295 | -3.18105 | -3.28377 |
| Acadsb            | -1.41521 | -2.02681 | -3.28306 |
| Pcsk6             | -1.89058 | -2.41025 | -3.28001 |
| Pccb              | -1.28545 | -2.61117 | -3.24795 |
| Abcb11            | -1.44073 | -3.78188 | -3.24408 |
| Ldhd              | -1.51784 | -2.09312 | -3.23384 |
| Slco1b2           | -1.96047 | -25.7374 | -3.22862 |
| Mccc2             | -1.42635 | -3.55969 | -3.2224  |
| 9030420J04Ri<br>k | -1.27283 | -2.37606 | -3.20491 |
| C2cd2             | -1.58475 | -2.69141 | -3.20379 |
| Celf2             | -1.81347 | -2.16859 | -3.19456 |
| Fam195a           | -1.69856 | -2.07882 | -3.1917  |
| Suclg2            | -1.37372 | -2.51462 | -3.19137 |
| Pnkd              | -1.67123 | -1.53869 | -3.19075 |
| Fahd1             | -1.4046  | -3.13651 | -3.18614 |
| Fpr1              | -1.35637 | -1.82101 | -3.17705 |
| Pemt              | -1.26814 | -3.52241 | -3.16698 |
| Acy1              | -1.33858 | -1.66531 | -3.16403 |
| Glo1              | -1.8818  | -1.9717  | -3.16331 |
| Pm20d1            | -1.4105  | -3.26899 | -3.15771 |
| Suclg2            | -1.37972 | -2.55434 | -3.15709 |
| Oaf               | -1.20215 | -2.17074 | -3.1414  |
| Hgd               | -1.46582 | -4.22921 | -3.13488 |
| Slc10a2           | 1.0973   | 2.43905  | -3.13329 |
| Pstpip2           | -1.30788 | -2.63421 | -3.12452 |
| Chrna2            | -2.23067 | -3.45183 | -3.12053 |
| Hibch             | -1.39562 | -2.09582 | -3.11333 |
| Fpgs              | -1.62735 | -2.94666 | -3.1097  |
| 3110057O12R<br>ik | -1.45332 | -3.87295 | -3.10895 |
| Fam176a           | -1.23617 | -1.67155 | -3.09856 |
| Cyp2c67           | -1.51423 | -5.34038 | -3.09113 |
| Mgam              | -1.25419 | -2.03098 | -3.08376 |
| Mmd               | -1.60296 | -2.58056 | -3.08002 |
| Ppara             | -1.27117 | -3.15785 | -3.07691 |

|                   |          |          |          |
|-------------------|----------|----------|----------|
| Nr1h4             | -1.12532 | -2.73868 | -3.0765  |
| Acy3              | 1.23632  | -2.05629 | -3.06811 |
| Eepd1             | -1.9012  | -2.60213 | -3.06775 |
| Pklr              | -1.17795 | -3.98678 | -3.06562 |
| Dpp4              | -1.24157 | -9.91658 | -3.05957 |
| 4931406C07R<br>ik | -1.39161 | -3.19919 | -3.0507  |
| Cish              | -1.23202 | -2.98569 | -3.04975 |
| Pygl              | -1.26823 | -5.54121 | -3.04693 |
| Ggt6              | -1.44038 | -1.88356 | -3.04228 |
| Lrat              | -1.3401  | -3.3621  | -3.03028 |
| Sult1c2           | -1.3309  | -1.01911 | -3.02709 |
| Hsd3b7            | -1.7287  | -3.50182 | -3.02216 |
| Gas1              | -1.91618 | -2.73757 | -3.02116 |
| Nipsnap1          | -1.34542 | -1.68917 | -3.02075 |
| Echdc1            | -1.44615 | -2.33919 | -3.0181  |
| Galm              | -1.07426 | -2.3793  | -3.0169  |
| Hibadh            | -1.38402 | -2.52084 | -3.01526 |
| Glo1              | -1.7786  | -1.85269 | -3.0119  |
| Tnfsf10           | 1.2813   | -1.47884 | -3.00057 |
| AU018778          | -1.57392 | -41.4982 | -1.42834 |
| Lect2             | -2.11754 | -21.8209 | 1.05042  |
| Slco1a4           | -1.51322 | -19.0678 | -1.89702 |
| Cyp2c37           | -2.36854 | -17.0516 | -1.99078 |
| Rgn               | -1.83539 | -16.6101 | -2.59071 |
| Cyp2c38           | -1.65705 | -13.8181 | 1.70393  |
| Enpep             | -2.16679 | -13.5788 | -1.94132 |
| Cyp2e1            | -1.16058 | -13.1262 | -1.53071 |
| Lhpp              | -3.95252 | -12.3834 | -2.44896 |
| Cyp4a10           | -4.76584 | -12.1397 | -2.28836 |
| Cyp3a11           | -1.53865 | -12.1093 | -2.03252 |
| Slc1a2            | -2.23842 | -11.8737 | 3.10488  |
| Cyp4a32           | -4.16541 | -11.7737 | -1.98327 |
| Scp2              | -1.36439 | -8.0288  | -2.28325 |
| Cyp2c29           | -1.49185 | -6.77421 | -2.03266 |
| Ar                | -1.8696  | -6.70667 | 1.83971  |
| Aqp9              | -1.38984 | -6.65912 | -1.57117 |
| Lipc              | -1.59236 | -6.59665 | -2.71702 |
| Fmo1              | -1.76245 | -6.41772 | -2.17815 |
| Onecut2           | -1.78903 | -5.65392 | -2.99663 |
| Cyp26a1           | -2.6073  | -5.62614 | -2.2595  |
| Ces3              | -1.31839 | -5.3528  | -2.52684 |
| Tmtc2             | -2.36122 | -5.06544 | -2.62406 |
| Tbx3              | -2.48387 | -4.98853 | 1.23272  |
| Glul              | -2.11902 | -4.96748 | 1.50406  |
| Ndrg2             | -1.16033 | -4.88391 | -2.22918 |
| Fam82a1           | -2.8951  | -4.8787  | -2.34314 |
| Slc22a1           | -1.59226 | -4.86524 | -2.7522  |

|               |          |          |          |
|---------------|----------|----------|----------|
| Cyp4f15       | -1.14096 | -4.79444 | -2.86888 |
| Nr1i3         | -1.92399 | -4.74286 | -2.37994 |
| Slc17a2       | 1.05623  | -4.70611 | -1.20613 |
| Glul          | -1.94807 | -4.64031 | 1.58105  |
| Gulo          | -1.37427 | -4.58867 | 1.37684  |
| Chic1         | -1.25914 | -4.54565 | -1.85623 |
| Cyp4a31       | -2.78851 | -4.47892 | 1.10315  |
| BC031353      | -1.64839 | -4.47208 | -2.91739 |
| Aldh1a1       | -2.13142 | -4.47132 | -2.74407 |
| Cpox          | -1.66663 | -4.39758 | -1.93767 |
| Ecm1          | -1.27689 | -4.23218 | -1.44658 |
| Cyp2d22       | -1.15882 | -4.15264 | -2.68375 |
| Pank1         | -1.3121  | -3.82932 | -2.78981 |
| Elovl2        | -1.0334  | -3.81585 | -2.7922  |
| Aqp1          | -1.06227 | -3.81382 | -2.47537 |
| Aox1          | -1.64278 | -3.65387 | -1.69052 |
| Ppp1r3c       | -2.19018 | -3.60484 | -2.47021 |
| Gpcpd1        | 1.62594  | -3.5959  | -1.00102 |
| Cyp7a1        | 1.65911  | -3.58212 | 1.32011  |
| Akr1c6        | -1.15342 | -3.5228  | -1.77612 |
| Apoc3         | -1.02922 | -3.50844 | -2.93569 |
| Id3           | -2.05893 | -3.48496 | -2.87999 |
| Lrrc28        | -1.71869 | -3.47035 | -2.66389 |
| Notum         | -1.29896 | -3.45968 | 1.56412  |
| Cyp4b1        | 1.1918   | -3.44736 | -1.01668 |
| Ttc39c        | 1.12869  | -3.43514 | -2.99692 |
| Cyp2c39       | -2.4884  | -3.41308 | 8.56776  |
| Slc17a4       | -1.13914 | -3.40147 | -2.27823 |
| Slc16a10      | -1.74043 | -3.40127 | 1.97327  |
| Gphn          | -1.35393 | -3.373   | -2.28505 |
| Hspb1         | -2.10432 | -3.34339 | -1.74538 |
| Pnpla8        | -1.41014 | -3.33915 | -1.99248 |
| Pdilt         | -1.91922 | -3.3256  | -2.98744 |
| Gpr182        | 1.20242  | -3.31797 | -2.70361 |
| Aox3          | 1.48399  | -3.31426 | -1.44549 |
| Mlxipl        | -1.13172 | -3.3047  | -2.18763 |
| Oplah         | -1.76275 | -3.3017  | -2.41866 |
| 9530008L14Rik | -1.43327 | -3.26666 | -2.31944 |
| 1300010F03Rik | -1.45268 | -3.26175 | -2.55633 |
| Hspb1         | -2.03622 | -3.25069 | -1.69805 |
| Alas1         | 1.08907  | -3.22625 | -1.63377 |
| Avpr1a        | 1.13453  | -3.21862 | 5.75576  |
| Sepw1         | -1.43464 | -3.19924 | -2.14676 |
| Stab2         | 1.23279  | -3.19408 | -2.2839  |
| Acot1         | -3.99855 | -3.18128 | -1.76816 |
| Pdp2          | -2.03455 | -3.16912 | -2.67985 |



|                   |          |          |          |
|-------------------|----------|----------|----------|
| Slc22a3           | -1.76116 | -3.15427 | -1.65243 |
| Npr2              | -1.85612 | -3.15362 | -2.65082 |
| Bbox1             | -1.21536 | -3.15354 | -1.53994 |
| 1110057K04R<br>ik | -1.27634 | -3.14948 | -1.81782 |
| Chic1             | -1.26981 | -3.1479  | -1.63559 |
| St3gal4           | -1.18729 | -3.12194 | -2.57403 |
| Ablim3            | -1.53092 | -3.10454 | 1.39676  |
| Tsku              | -2.01844 | -3.08455 | -2.39696 |
| Dhdh              | -1.19097 | -3.07544 | -2.94861 |
| Epm2a             | -1.5908  | -3.0708  | -2.88596 |
| Acot4             | -3.50879 | -3.07071 | -2.76383 |
| Lgr5              | -1.60272 | -3.05043 | 7.96855  |
| 1600014C10R<br>ik | -1.56785 | -3.04276 | -2.71145 |
| Ttc32             | -1.59064 | -3.04129 | -2.58907 |
| Rnf186            | -1.95941 | -3.04067 | -1.44387 |
| Plin2             | -2.10719 | -3.03995 | -2.979   |
| Prodh2            | -1.22756 | -3.03316 | -2.25176 |
| Lpin1             | 1.27567  | -3.0015  | 1.04576  |
| Rcan2             | -3.16385 | -1.64375 | 2.58719  |
| Snora44           | -3.08252 | -1.30644 | -1.1958  |
| Sgk2              | -2.73065 | -2.51038 | -1.80754 |
| Acot2             | -2.51623 | -1.08922 | 1.18766  |
| Pex11a            | -2.35945 | -2.91373 | -2.60065 |
| Uck1              | -2.3227  | -2.92056 | -2.47535 |
| Tmem98            | -2.3007  | 1.88541  | 1.51128  |
| Agpat9            | -2.29187 | -1.77834 | -2.16704 |
| Spatc1            | -2.27513 | -1.7305  | -2.72477 |
| 4732463B04R<br>ik | -2.27116 | -2.06492 | -1.86352 |
| Snora16a          | -2.18218 | 1.18263  | -1.08723 |
| Hsd12             | -2.14625 | -2.36482 | -1.45808 |
| Insig2            | -2.12616 | -1.38674 | -1.19424 |
| Mtnr1a            | -2.12165 | -2.642   | -2.80942 |
| Nr4a1             | -2.11235 | -1.85589 | 1.43937  |
| Rdh18             | -2.09635 | -2.27598 | -2.14179 |
| Me1               | -2.03735 | -2.95461 | -1.01702 |
| Ddc               | -2.03708 | -2.23943 | -1.51032 |
| Olig1             | -2.02106 | -2.62838 | -2.68192 |
| Lgals1            | -2.01884 | 1.4574   | -1.81212 |
| Me1               | -2.0101  | -2.99745 | 1.01003  |
| Slc39a2           | -2.0094  | -2.87442 | -2.28911 |
| Tmem189           | -2.00298 | -2.56279 | -1.50536 |

Supporting Table 3

| Supporting Table 3, (Category I transcripts) |                                   |                                 |                                 |             |
|----------------------------------------------|-----------------------------------|---------------------------------|---------------------------------|-------------|
| Gene Symbol                                  | Fold-Change (Nodular vs. Control) | Fold-Change (HCC_A vs. Control) | Fold-Change (HCC_B vs. Control) | Legend      |
| Igf2                                         | 13.0706                           | 106.18                          | 104.187                         | -15 onwards |
| H19                                          | 35.4462                           | 72.6964                         | 82.688                          | -3 to -15   |
| Bex1                                         | 4.14501                           | 70.4085                         | 83.8178                         | -3 to -1    |
| Tspan8                                       | 3.09904                           | 62.7977                         | 18.5679                         | 1 to 3      |
| Klrb1a                                       | 10.9824                           | 52.5957                         | 19.5293                         | 3 to 15     |
| 2210415<br>F13Rik                            | 2.37774                           | 42.0677                         | 6.35613                         | 15 onwards  |
| Gldn                                         | 39.4078                           | 40.8852                         | 45.0136                         |             |
| Psat1                                        | 7.16688                           | 40.6757                         | 35.0885                         |             |
| A2m                                          | 2.17952                           | 37.2123                         | 18.2744                         |             |
| Krt20                                        | 25.2349                           | 36.9497                         | 4.85659                         |             |
| Cd63                                         | 19.9898                           | 31.7967                         | 34.6431                         |             |
| Igfbp6                                       | 2.36218                           | 29.0217                         | 24.672                          |             |
| Vil1                                         | 9.1913                            | 23.8275                         | 19.3018                         |             |
| Scd2                                         | 14.023                            | 23.1374                         | 17.7057                         |             |
| Akr1c18                                      | 49.7676                           | 21.7316                         | 5.5744                          |             |
| Tff3                                         | 35.3782                           | 21.4822                         | 33.6629                         |             |
| Ngfrap1                                      | 2.14401                           | 19.9094                         | 17.7802                         |             |
| Gm1000<br>9                                  | 2.60015                           | 19.0142                         | 22.2096                         |             |
| D17H6S5<br>6E-5                              | 6.47345                           | 18.8674                         | 10.5344                         |             |
| Lpl                                          | 9.2723                            | 17.1384                         | 12.8959                         |             |
| Ly6d                                         | 6.73055                           | 16.5762                         | 51.0326                         |             |
| 1700019<br>D03Rik                            | 7.73199                           | 15.8857                         | 7.73591                         |             |
| Mfge8                                        | 5.89407                           | 15.245                          | 10.6241                         |             |
| Serpinb6<br>b                                | 3.29153                           | 15.1716                         | 7.88894                         |             |
| Peg3                                         | 2.29478                           | 14.9933                         | 4.9231                          |             |
| Crip1                                        | 4.21983                           | 14.2125                         | 5.45513                         |             |
| Kcnk16                                       | 3.71014                           | 14.0864                         | 13.2229                         |             |
| Gm609                                        | 3.29495                           | 13.9363                         | 5.77995                         |             |
| Il1rn                                        | 6.74055                           | 13.9341                         | 9.59099                         |             |
| Alox5                                        | 6.12594                           | 13.7385                         | 7.87295                         |             |
| Dsg1c                                        | 8.14632                           | 13.65                           | 7.56418                         |             |
| Dsg1a                                        | 8.85303                           | 13.2246                         | 8.11545                         |             |
| Pygb                                         | 10.1333                           | 13.0745                         | 9.95799                         |             |
| Asns                                         | 3.13885                           | 13.015                          | 7.89346                         |             |
| Cidea                                        | 4.71218                           | 12.7792                         | 11.9462                         |             |

|                   |         |         |         |
|-------------------|---------|---------|---------|
| Rbp1              | 7.8876  | 12.5966 | 9.67947 |
| Endod1            | 7.56378 | 12.2761 | 21.3653 |
| Exph5             | 3.74248 | 12.1851 | 10.2914 |
| Tagln2            | 3.37127 | 12.1793 | 8.35988 |
| Igfbp1            | 3.38984 | 12.1705 | 42.3844 |
| Gprc5b            | 2.11293 | 12.1687 | 6.37402 |
| Gpr56             | 5.11677 | 12.1684 | 5.83111 |
| Plat              | 2.29332 | 11.7479 | 49.546  |
| Atp6v0d2          | 10.3332 | 11.5034 | 19.8    |
| Prss8             | 12.5191 | 10.939  | 10.5258 |
| Pdk3              | 4.58984 | 10.8771 | 7.70526 |
| Nrip2             | 4.6399  | 10.8553 | 5.15543 |
| Gdpd1             | 2.01728 | 10.77   | 13.1723 |
| Slc41a3           | 5.1175  | 10.6934 | 10.5293 |
| Isyna1            | 5.75287 | 10.6821 | 21.4561 |
| Cdkn1a            | 2.56134 | 10.6345 | 8.26152 |
| Renbp             | 5.09671 | 10.5479 | 12.5961 |
| Nucb2             | 3.35072 | 10.505  | 5.87321 |
| B4galt6           | 2.67601 | 10.502  | 7.81907 |
| S100a11           | 3.04926 | 10.1551 | 11.741  |
| Prrg4             | 2.84183 | 10.1024 | 7.8525  |
| Gpr110            | 9.05365 | 10.0856 | 10.9086 |
| Egr1              | 7.12353 | 9.59988 | 11.1919 |
| Anxa9             | 3.47984 | 9.54407 | 9.51122 |
| Fzd3              | 2.15193 | 9.45774 | 11.0001 |
| Cdh1              | 8.5354  | 9.39522 | 9.91473 |
| Bglap-rs1         | 2.81185 | 8.99936 | 3.94107 |
| Gls               | 2.70557 | 8.9526  | 10.83   |
| Anxa2             | 2.72963 | 8.79089 | 9.86025 |
| Sectm1b           | 4.88913 | 8.58831 | 4.9001  |
| Npdc1             | 3.17838 | 8.58407 | 8.29445 |
| Sstr2             | 4.20507 | 8.52599 | 3.30849 |
| Cd9               | 2.62638 | 8.33254 | 10.6122 |
| Igdcc4            | 6.51365 | 8.2501  | 7.90271 |
| Ank2              | 3.11874 | 8.15344 | 9.638   |
| Pfkip             | 2.09759 | 8.0406  | 10.9916 |
| Fgl2              | 3.57767 | 8.03434 | 4.49587 |
| Gramd1b           | 2.4949  | 7.98577 | 8.87626 |
| Itga6             | 2.09885 | 7.94726 | 3.23693 |
| Rhoc              | 4.3488  | 7.8295  | 8.21062 |
| 2210404<br>O07Rik | 3.39894 | 7.82352 | 3.36835 |
| Tuft1             | 3.39158 | 7.78037 | 7.90369 |
| Prom2             | 19.786  | 7.73123 | 15.9955 |
| Btg3              | 2.78741 | 7.46891 | 9.86013 |

|                   |         |         |         |
|-------------------|---------|---------|---------|
| Rab3d             | 2.80474 | 7.17591 | 6.24308 |
| Emp2              | 3.3592  | 7.08816 | 7.46271 |
| Slc7a9            | 3.25909 | 6.81217 | 6.24412 |
| Afp               | 2.02558 | 6.71102 | 6.52713 |
| Aebp1             | 2.42105 | 6.68952 | 3.73151 |
| Mtmr11            | 3.94909 | 6.62247 | 9.69818 |
| Nid1              | 3.58113 | 6.50475 | 8.0618  |
| Nxn               | 3.96522 | 6.48999 | 5.11001 |
| Ddr1              | 2.76707 | 6.42184 | 6.3809  |
| Cldn4             | 2.42913 | 6.31882 | 3.49684 |
| Nipal1            | 3.74538 | 6.1154  | 8.38608 |
| Myo7b             | 2.01334 | 5.6901  | 4.76924 |
| Tuba8             | 2.84794 | 5.6782  | 7.29897 |
| Slc9a7            | 3.83141 | 5.66896 | 6.28187 |
| Lysmd2            | 2.74342 | 5.61356 | 3.82383 |
| Myadm             | 3.65914 | 5.59333 | 4.91929 |
| Lrrc8e            | 2.13486 | 5.51888 | 4.86352 |
| Aph1b             | 4.71319 | 5.51693 | 4.07686 |
| P2rx7             | 3.97408 | 5.51089 | 5.49297 |
| Tlr1              | 2.82985 | 5.48467 | 3.85342 |
| Ets2              | 2.14067 | 5.47127 | 6.20986 |
| Bace2             | 2.42809 | 5.45315 | 4.9749  |
| Mst1r             | 3.71999 | 5.3754  | 6.01186 |
| Nedd9             | 2.26994 | 5.35801 | 5.65459 |
| Pls1              | 2.44901 | 5.35746 | 5.51857 |
| Ifngr1            | 2.15542 | 5.30745 | 6.54226 |
| Tmem71            | 2.88098 | 5.26188 | 6.30031 |
| Nfe2l3            | 2.32607 | 5.16753 | 7.61183 |
| Tspan15           | 5.3506  | 5.13268 | 4.55849 |
| App               | 2.35505 | 5.11848 | 4.62793 |
| Greb1l            | 3.75959 | 5.05224 | 5.69895 |
| BB28746<br>9      | 3.16481 | 5.00259 | 13.7124 |
| Thbs1             | 2.08549 | 4.91817 | 51.9212 |
| Tmem22<br>9a      | 3.35119 | 4.85819 | 5.55358 |
| Zfp618            | 2.14112 | 4.83179 | 3.25768 |
| Cpd               | 2.90292 | 4.83164 | 4.02178 |
| Shc2              | 3.05136 | 4.75543 | 6.69837 |
| Sox9              | 2.85455 | 4.75335 | 3.02587 |
| Cyp2a22           | 4.93043 | 4.69614 | 6.67687 |
| 0610010<br>O12Rik | 2.42824 | 4.61777 | 3.42223 |
| Abi2              | 2.97396 | 4.61103 | 4.90677 |
| Esm1              | 3.60362 | 4.59846 | 6.78101 |

|                   |          |          |          |
|-------------------|----------|----------|----------|
| Gadd45b           | 2.92788  | 4.5953   | 6.82919  |
| Fndc3b            | 3.06655  | 4.50885  | 3.69663  |
| Ahnak             | 3.63901  | 4.49717  | 8.16587  |
| Cyp39a1           | 2.25186  | 4.46286  | 4.63808  |
| Ctps2             | 2.56166  | 4.45756  | 3.89212  |
| Spire2            | 2.101    | 4.43777  | 5.44309  |
| Cd34              | 2.41893  | 4.28237  | 4.24709  |
| Nup93             | 2.26485  | 4.06977  | 3.95922  |
| Uap1l1            | 2.06694  | 4.06125  | 6.17233  |
| 9430020<br>K01Rik | 2.74853  | 4.03468  | 4.42816  |
| Unc13b            | 3.03116  | 3.96099  | 3.18067  |
| Acs14             | 2.65093  | 3.95778  | 5.47142  |
| Tmem15<br>9       | 2.11069  | 3.87068  | 3.71105  |
| Slc6a8            | 2.15762  | 3.78039  | 3.73228  |
| Tpm1              | 2.03419  | 3.72081  | 4.29852  |
| Hsd3b1            | 2.58561  | 3.71798  | 5.76826  |
| Abhd2             | 3.97243  | 3.67989  | 3.67789  |
| Stmn1             | 2.2039   | 3.65171  | 3.214    |
| Ptgfrn            | 2.21878  | 3.62003  | 3.13805  |
| Ppl               | 2.03116  | 3.58744  | 4.17298  |
| Wdr1              | 2.02059  | 3.50992  | 3.33673  |
| Hunk              | 2.33346  | 3.49332  | 6.29368  |
| Ica1              | 2.26926  | 3.47368  | 3.07693  |
| Slc1a4            | 2.13713  | 3.45931  | 3.90342  |
| Rtkn              | 2.06001  | 3.43581  | 3.25804  |
| Tgfbr2            | 3.27318  | 3.41756  | 4.70115  |
| Gria3             | 4.80474  | 3.29561  | 3.69443  |
| Sort1             | 2.00931  | 3.24934  | 6.17537  |
| Pole2             | 3.40993  | 3.21874  | 3.24276  |
| Myh9              | 2.03021  | 3.16179  | 3.31906  |
| Rims2             | 2.13158  | 3.10722  | 3.23113  |
| Paqr4             | 2.54715  | 3.07095  | 3.38889  |
| Cyp4a14           | -21.9139 | -96.1473 | -20.321  |
| Mfsd2a            | -5.36553 | -37.0946 | -33.9815 |
| Elovl3            | -4.80674 | -36.6054 | -43.5567 |
| Cyp2c50           | -2.0156  | -33.9755 | -10.447  |
| Thrsp             | -2.54556 | -29.6304 | -51.3951 |
| Cyp3a41b          | -3.27903 | -26.9751 | -5.41328 |
| Cyp3a41a          | -3.58855 | -25.9924 | -5.27839 |
| Oat               | -5.92246 | -22.6358 | -9.70971 |
| Sucnr1            | -4.83961 | -20.6001 | -26.9794 |
| Acss3             | -7.02517 | -18.9085 | -17.6883 |
| Ugt3a1            | -2.17244 | -16.7324 | -62.6456 |

|                   |          |          |          |
|-------------------|----------|----------|----------|
| Rdh16             | -4.50553 | -14.8319 | -16.3016 |
| Acaa1b            | -3.85477 | -12.6024 | -7.22487 |
| 5033411D<br>12Rik | -2.75522 | -12.4882 | -14.0102 |
| Slc1a2            | -2.23842 | -11.8737 | 3.10488  |
| Suox              | -3.00183 | -11.7857 | -12.4475 |
| Slco2b1           | -2.04209 | -11.6884 | -13.4627 |
| Slco1a1           | 2.44495  | -11.662  | -18.6103 |
| Prodh             | -2.21316 | -11.639  | -6.3699  |
| Cyp3a44           | -2.59327 | -11.2937 | -3.48843 |
| Lipg              | -3.77272 | -10.9928 | -11.6918 |
| Car5a             | -2.12968 | -10.8953 | -16.7914 |
| 0610012H<br>03Rik | -2.11215 | -10.0672 | -19.3012 |
| 9130409I2<br>3Rik | -4.23513 | -9.95838 | -6.80093 |
| Mmd2              | -3.03719 | -9.49965 | -10.3618 |
| Gabbr2            | -2.17032 | -9.40358 | -11.6512 |
| Gm4952            | -2.14332 | -8.94567 | -12.6285 |
| Inhbe             | -3.95926 | -8.62856 | -31.5856 |
| Apol7a            | -2.27131 | -8.2697  | -16.9009 |
| Retsat            | -2.2326  | -8.05765 | -7.97023 |
| Mme               | -4.59979 | -7.50045 | -30.168  |
| Slc25a25          | -3.80925 | -7.41919 | -5.45129 |
| Acacb             | -3.45201 | -7.04275 | -7.68048 |
| Fitm1             | -3.88508 | -6.96551 | -16.5896 |
| Hac11             | -2.75982 | -6.93443 | -7.28028 |
| G0s2              | -4.87552 | -6.78983 | -7.52262 |
| Cd36              | -2.27891 | -6.67352 | -5.66766 |
| Nr0b2             | -2.19047 | -6.50435 | -7.7609  |
| Lrtm1             | -3.62256 | -6.4635  | -7.85773 |
| Cml5              | -3.57228 | -6.36918 | -7.18705 |
| Cmb1              | -2.42346 | -6.13371 | -8.15372 |
| Mgl1              | -2.07791 | -6.13178 | -3.50832 |
| 9030619P<br>08Rik | -4.56011 | -6.05066 | -8.89656 |
| Pdk1              | -2.00696 | -5.94228 | -5.2902  |
| Paqr9             | -3.21697 | -5.84537 | -11.3163 |
| P2ry1             | -2.23172 | -5.72457 | -5.54324 |
| EG634650          | -2.3852  | -5.25771 | -6.03805 |
| Slc15a5           | -2.37352 | -5.0274  | -4.94546 |
| Rab30             | -3.84505 | -4.83941 | -7.00052 |
| Adipor2           | -2.09861 | -4.63916 | -4.05368 |
| Olfm3             | -2.21688 | -4.56464 | -5.01236 |
| Acot3             | -5.52272 | -4.51507 | -5.91724 |

|          |          |          |          |
|----------|----------|----------|----------|
| Ttc7b    | -2.13393 | -4.47609 | -4.46483 |
| Chpt1    | -2.02346 | -4.39622 | -6.50325 |
| Ildr2    | -2.84134 | -4.36858 | -4.37621 |
| Slc17a8  | -2.15163 | -4.30868 | -3.41189 |
| Fabp2    | -3.00165 | -4.18347 | -7.49922 |
| Trhde    | -2.51141 | -4.16622 | -4.78686 |
| Cd1d1    | -2.41564 | -4.14867 | -5.69659 |
| Slc30a10 | -2.66675 | -4.1149  | -4.78067 |
| Plk3     | -2.08115 | -4.01634 | -5.73913 |
| Cryl1    | -2.34354 | -3.86503 | -7.05897 |
| Gstt3    | -2.12279 | -3.72897 | -3.47132 |
| Extl1    | -2.74446 | -3.58057 | -4.74051 |
| Chrna2   | -2.23067 | -3.45183 | -3.12053 |
| Clec2h   | 2.45858  | -3.42541 | -3.81134 |
| Cyp2c39  | -2.4884  | -3.41308 | 8.56776  |
| Paox     | -2.24606 | -3.36117 | -4.13983 |
| Abcc3    | -2.87789 | -3.26587 | -10.4455 |
| Leap2    | -3.52897 | -3.13493 | -4.40101 |
| Raet1d   | -3.44794 | -3.10377 | -26.5803 |
|          |          |          |          |

Supporting Table 4

| Supporting Table 4, (Category II transcripts) |                                      |                                    |                                    |             |
|-----------------------------------------------|--------------------------------------|------------------------------------|------------------------------------|-------------|
| Gene Symbol                                   | Fold-Change<br>(Nodular vs. Control) | Fold-Change<br>(HCC_A vs. Control) | Fold-Change<br>(HCC_B vs. Control) | Legend      |
| Moxd1                                         | 10.1789                              | -1.32923                           | -1.36541                           | -15 onwards |
| Aldh3b2                                       | 6.249                                | 1.81808                            | 2.48684                            | -3 to -15   |
| Cib3                                          | 3.65659                              | 1.01836                            | -1.48786                           | -3 to -1    |
| S1pr3                                         | 3.64268                              | -1.10253                           | 1.55324                            | 1 to 3      |
| 1700055N04<br>Rik                             | 3.40565                              | 1.32253                            | 1.73873                            | 3 to 15     |
| Mmp12                                         | 3.26368                              | 2.00449                            | 2.72542                            | 15 onwards  |
| Spint1                                        | 2.99066                              | 1.70505                            | 1.53346                            |             |
| Itih5                                         | 2.68729                              | 1.80806                            | 1.30103                            |             |
| Grem2                                         | 2.49187                              | 1.41648                            | 2.88383                            |             |
| Enpp1                                         | 2.48106                              | 2.52511                            | 2.8159                             |             |
| Rtn4r                                         | 2.4797                               | 2.30145                            | 2.31414                            |             |
| Tbc1d30                                       | 2.45793                              | 1.25933                            | 1.62007                            |             |
| Oxa1l                                         | 2.45037                              | 2.79106                            | 1.90967                            |             |
| Gcnt4                                         | 2.43628                              | 2.04704                            | 1.9599                             |             |
| Cyb5r1                                        | 2.4297                               | 2.72665                            | 2.54919                            |             |
| Eil3                                          | 2.41396                              | 2.33965                            | 1.86406                            |             |
| A730020M07<br>Rik                             | 2.38347                              | 2.34428                            | 1.10075                            |             |
| Prc1                                          | 2.37678                              | 2.95884                            | 2.67791                            |             |
| Slc20a1                                       | 2.33606                              | 2.31441                            | 2.71006                            |             |
| Klhdc1                                        | 2.32102                              | 2.06971                            | 2.42284                            |             |
| P2rx4                                         | 2.30419                              | 1.88809                            | 1.5335                             |             |
| Plk1                                          | 2.27603                              | 2.94695                            | 2.03622                            |             |
| Rasal1                                        | 2.26929                              | 2.88154                            | 2.49242                            |             |
| Sh2d4a                                        | 2.23222                              | 2.61771                            | 2.9368                             |             |
| Gpr155                                        | 2.20814                              | 2.77934                            | 2.31898                            |             |
| Il17rb                                        | 2.20666                              | 2.17153                            | 1.4719                             |             |
| Rnf39                                         | 2.1941                               | 1.57018                            | 1.65306                            |             |
| 1700055N04<br>Rik                             | 2.1885                               | 1.14036                            | 1.24762                            |             |
| Plek2                                         | 2.18058                              | 2.60649                            | 2.43095                            |             |
| Rrm2                                          | 2.13227                              | 1.43612                            | 1.64964                            |             |
| Ifi44                                         | 2.13133                              | -1.17783                           | -1.54006                           |             |
| Ppif                                          | 2.11272                              | 1.99276                            | 1.18063                            |             |
| Soat2                                         | 2.10889                              | 1.37261                            | 1.24394                            |             |
| Rxfp3                                         | 2.10146                              | 1.24178                            | -1.02996                           |             |
| Rrbp1                                         | 2.0868                               | 2.00107                            | 1.38365                            |             |
| Rdh5                                          | 2.07683                              | -1.07817                           | -1.51488                           |             |
| Hist1h2ak                                     | 2.07012                              | 2.14429                            | 2.15846                            |             |



|                   |          |          |          |
|-------------------|----------|----------|----------|
| D630045J12R<br>ik | 2.06044  | 2.17122  | 2.579    |
| Pion              | 2.05146  | 1.23434  | 1.04655  |
| Hsd17b14          | 2.04953  | 2.65733  | 1.15479  |
| Krt23             | 2.03758  | 1.65799  | -2.28933 |
| Slc43a1           | 2.03293  | 1.74055  | 1.52668  |
| Foxq1             | 2.02584  | 1.1375   | 1.12775  |
| Pla2g12a          | 2.02473  | 1.78646  | 2.7399   |
| Osgin1            | 2.00456  | 2.54878  | 2.30068  |
| Rcan2             | -3.16385 | -1.64375 | 2.58719  |
| Snora44           | -3.08252 | -1.30644 | -1.1958  |
| Sgk2              | -2.73065 | -2.51038 | -1.80754 |
| Acot2             | -2.51623 | -1.08922 | 1.18766  |
| Pex11a            | -2.35945 | -2.91373 | -2.60065 |
| Uck1              | -2.3227  | -2.92056 | -2.47535 |
| Tmem98            | -2.3007  | 1.88541  | 1.51128  |
| Agpat9            | -2.29187 | -1.77834 | -2.16704 |
| Spatc1            | -2.27513 | -1.7305  | -2.72477 |
| 4732463B04Ri<br>k | -2.27116 | -2.06492 | -1.86352 |
| Snora16a          | -2.18218 | 1.18263  | -1.08723 |
| Hsd12             | -2.14625 | -2.36482 | -1.45808 |
| Insig2            | -2.12616 | -1.38674 | -1.19424 |
| Mtnr1a            | -2.12165 | -2.642   | -2.80942 |
| Nr4a1             | -2.11235 | -1.85589 | 1.43937  |
| Rdh18             | -2.09635 | -2.27598 | -2.14179 |
| Ddc               | -2.03708 | -2.23943 | -1.51032 |
| Olig1             | -2.02106 | -2.62838 | -2.68192 |
| Lgals1            | -2.01884 | 1.4574   | -1.81212 |
| Me1               | -2.0101  | -2.99745 | 1.01003  |
| Slc39a2           | -2.0094  | -2.87442 | -2.28911 |
| Tmem189           | -2.00298 | -2.56279 | -1.50536 |
| Me1               | -2.03735 | -2.95461 | -1.01702 |

Supporting Table 5

| Supporting Table 5, (Category III transcripts) |                                      |                                    |                                    |             |
|------------------------------------------------|--------------------------------------|------------------------------------|------------------------------------|-------------|
| Gene Symbol                                    | Fold-Change<br>(Nodular vs. Control) | Fold-Change<br>(HCC_A vs. Control) | Fold-Change<br>(HCC_B vs. Control) | Legend      |
| LOC641089                                      | 1.70355                              | 3.04282                            | 1.33423                            | -15 onwards |
| Tmem165                                        | 1.74051                              | 3.8543                             | 2.44776                            | -3 to -15   |
| Igf2as                                         | 1.01161                              | 3.24165                            | 2.53275                            | -3 to -1    |
| Crtap                                          | 1.53212                              | 3.37533                            | 2.30667                            | 1 to 3      |
| Prr15l                                         | 1.46584                              | 3.9606                             | 2.06629                            | 3 to 15     |
| Hmgcll1                                        | 1.06662                              | 4.92671                            | -1.03065                           | 15 onwards  |
| Akr1b3                                         | 1.65854                              | 3.16128                            | 2.34594                            |             |
| C1ql3                                          | 1.17107                              | 6.58114                            | 1.35727                            |             |
| Serinc2                                        | -1.77821                             | 3.52212                            | -1.54283                           |             |
| Elf3                                           | 1.46536                              | 5.29875                            | 2.24086                            |             |
| Adamts15                                       | 1.43394                              | 3.17789                            | 2.30529                            |             |
| Psph                                           | 1.27072                              | 4.77745                            | 2.88495                            |             |
| Cacna1e                                        | 1.04119                              | 3.29345                            | 2.95121                            |             |
| Ggct                                           | 1.89925                              | 3.36009                            | 1.94949                            |             |
| Slamf9                                         | 1.20332                              | 4.5419                             | 1.96308                            |             |
| Capg                                           | 1.30511                              | 3.01905                            | 1.29904                            |             |
| LOC10004705<br>3                               | 1.95632                              | 3.62547                            | 1.15185                            |             |
| Scara3                                         | 1.04935                              | 3.54333                            | -1.10428                           |             |
| Cyb561                                         | 1.49211                              | 4.20753                            | 1.26638                            |             |
| Kctd17                                         | 1.8587                               | 3.00923                            | 2.82751                            |             |
| Golm1                                          | 1.33781                              | 6.5084                             | 2.5038                             |             |
| Hhip2                                          | 1.9142                               | 4.35012                            | 1.48569                            |             |
| Dram1                                          | 1.41744                              | 5.96458                            | 2.74477                            |             |
| Ii10rb                                         | 1.66288                              | 3.40541                            | 2.86287                            |             |
| Slc23a3                                        | 1.20829                              | 4.41989                            | 2.45681                            |             |
| Hbegf                                          | 1.57028                              | 3.38424                            | 2.96898                            |             |
| Itgb8                                          | 1.09948                              | 3.14482                            | 2.11063                            |             |
| Prtn3                                          | 1.69182                              | 3.04661                            | 1.88714                            |             |
| Nebi                                           | 1.17264                              | 3.90445                            | 1.2805                             |             |
| Epcam                                          | 1.55748                              | 5.6346                             | 1.6268                             |             |
| Efemp2                                         | 1.25906                              | 8.1605                             | 2.33074                            |             |
| Pdzk1ip1                                       | 1.37252                              | 3.089                              | 2.0875                             |             |
| Rap1gap                                        | 1.5564                               | 3.97117                            | 2.48443                            |             |
| Phlda3                                         | 1.2613                               | 3.87755                            | 2.42398                            |             |
| Dnajc10                                        | 1.68331                              | 3.5784                             | 2.51485                            |             |
| Pglyrp1                                        | 1.09443                              | 3.72904                            | -1.06448                           |             |
| Myo5a                                          | 1.17514                              | 3.70345                            | 2.25269                            |             |
| Diap3                                          | 1.42102                              | 4.61966                            | 2.50718                            |             |
| Tgfb2                                          | 1.18532                              | 3.09199                            | 1.61385                            |             |

|                   |          |         |          |
|-------------------|----------|---------|----------|
| Hddc2             | 1.18037  | 3.0472  | 1.85751  |
| Nol3              | 1.7378   | 3.3876  | 1.13019  |
| Krt8              | 1.69744  | 3.43237 | 2.83389  |
| Plce1             | 1.96075  | 3.2103  | 1.62738  |
| Clec4e            | 1.11912  | 3.15486 | -1.09039 |
| Tceal5            | 1.11231  | 3.38893 | 1.94724  |
| Loxl4             | 1.03293  | 3.77008 | 2.04249  |
| Cd14              | -1.09376 | 3.17474 | 1.4162   |
| A530040E14R<br>ik | -1.04839 | 3.70954 | 1.88021  |
| Igsf8             | 1.76647  | 3.92174 | 2.97377  |
| Fam115a           | 1.96861  | 3.18837 | 2.71062  |
| Arfgap3           | 1.50808  | 3.28281 | 2.74291  |
| Gm6644            | 1.80848  | 3.2684  | 2.41882  |
| Ccl2              | 1.17915  | 9.64489 | 1.90195  |
| Rhoq              | -1.01568 | 3.46572 | 2.26019  |
| S100a8            | 1.06984  | 4.98835 | 1.20271  |
| Plaur             | 1.08563  | 3.27997 | 2.64468  |
| Vcam1             | 1.45989  | 4.20603 | -1.32577 |
| Casc5             | 1.9168   | 3.00925 | 2.37184  |
| Ggt1              | 1.11244  | 7.36693 | 1.071    |
| Tmx3              | 1.76399  | 3.2994  | 2.8267   |
| Icam1             | 1.32205  | 3.0526  | 1.37369  |
| Ccr2              | 1.30151  | 4.54444 | 1.30821  |
| Ccdc68            | 1.55249  | 4.01235 | 2.30383  |
| S100a9            | -1.12163 | 3.05589 | -1.04692 |
| Twf2              | 1.34737  | 3.16602 | 2.43782  |
| Cxcl14            | 1.65533  | 6.44427 | 1.51129  |
| Timp3             | 1.54039  | 3.38018 | 2.19682  |
| Ms4a7             | 1.04557  | 3.388   | 1.62489  |
| Itgam             | 1.06706  | 3.07548 | 1.54883  |
| Nupr1             | 1.42806  | 3.65767 | 1.3913   |
| Bglap2            | 1.77727  | 5.14621 | 2.22917  |
| C130026I21Ri<br>k | 1.13374  | 3.95929 | 1.98223  |
| Ctca1             | 1.62671  | 3.18208 | 2.31844  |
| Cgref1            | 1.50038  | 3.27831 | 2.65368  |
| Sh3pxd2b          | 1.26232  | 3.58456 | 2.34945  |
| Glpr2             | 1.04867  | 5.69497 | 1.17986  |
| Spink3            | 1.74215  | 25.108  | 2.11021  |
| Ttc9              | 1.01419  | 9.88011 | 2.42048  |
| Ms4a6c            | -1.03739 | 3.18283 | -1.18431 |
| Osbpl3            | -1.15241 | 3.76693 | -1.1951  |
| Prkca             | 1.25244  | 3.06471 | 1.70521  |
| Bcl2a1b           | 1.1627   | 3.47516 | 1.58958  |

|                   |          |         |          |
|-------------------|----------|---------|----------|
| Casp4             | 1.18383  | 11.4213 | 1.50064  |
| Rgs10             | 1.05716  | 3.08426 | 1.03974  |
| Slc7a11           | 1.00846  | 3.65972 | -1.01119 |
| Emb               | -1.04847 | 3.40079 | 1.35349  |
| Ntn4              | 1.80781  | 3.17871 | 2.85914  |
| Pdgfb             | 1.19982  | 3.52279 | 1.49362  |
| Syt17             | 1.35914  | 3.0363  | 1.89104  |
| Glis3             | 1.25814  | 3.8259  | 1.51958  |
| Vdr               | -1.10364 | 5.17244 | 1.10477  |
| Fkbp1b            | 1.07616  | 3.11491 | 1.2946   |
| Me2               | 1.66176  | 4.32252 | 1.62299  |
| Cdhr2             | 1.12499  | 9.65945 | 1.84515  |
| Capsl             | 1.97942  | 10.3305 | 1.40484  |
| Mthfd2            | 1.1032   | 4.85179 | 1.72863  |
| Anxa13            | 1.52808  | 24.8867 | 1.47762  |
| Casp1             | -1.23351 | 4.71603 | -1.44746 |
| Sema5a            | 1.03488  | 5.62451 | 1.30229  |
| Ms4a6d            | -1.09629 | 3.3976  | 2.50704  |
| Prelid2           | -1.20065 | 8.2288  | 2.10247  |
| Tceal8            | 1.51805  | 3.81012 | 2.64423  |
| Atp1a2            | 1.16437  | 5.89202 | 1.23887  |
| Sh3bgrl3          | 1.53659  | 3.62086 | 1.59473  |
| Pfn2              | 1.53016  | 3.53074 | 2.12991  |
| Pgm1              | 1.71127  | 4.3876  | 2.79074  |
| Adck4             | 1.96002  | 3.26354 | 2.17934  |
| Chrm3             | 1.98663  | 8.98505 | 1.23318  |
| Rbl1              | 1.95357  | 3.10344 | 2.54574  |
| Creb3l2           | 1.70993  | 3.14193 | 2.62378  |
| Fry               | 1.20222  | 4.27259 | 1.67762  |
| Fam73a            | 1.1803   | 4.00687 | 2.2202   |
| Vsig10l           | 1.21645  | 3.49795 | 2.57053  |
| St14              | 1.99359  | 3.07943 | 1.16966  |
| Fam132a           | 1.11751  | 7.30009 | 1.10178  |
| Crym              | 1.46569  | 4.36336 | 2.00062  |
| Cap2              | 1.11051  | 3.0788  | 1.0465   |
| Rcan3             | 1.06628  | 3.47336 | 2.14719  |
| Clec5a            | 1.08813  | 3.37144 | 1.18641  |
| Ostb              | -1.02159 | 8.95724 | 1.53342  |
| Efcab3            | 1.32825  | 21.0875 | 2.514    |
| 2610524H06<br>Rik | 1.5817   | 5.39241 | 2.55282  |
| Ppap2c            | 1.96934  | 3.14494 | 2.48197  |
| Ace               | 1.30817  | 13.8728 | 1.83873  |
| Ccne1             | 1.91048  | 3.49768 | 1.99031  |
| Lxn               | 1.20454  | 4.615   | -1.04486 |

|          |          |          |          |
|----------|----------|----------|----------|
| Fam129a  | 1.06526  | 4.76712  | -1.59952 |
| Anxa5    | 1.91645  | 3.20169  | 2.63096  |
| Bcl2a1d  | 1.16664  | 3.45036  | 1.60672  |
| Plscr1   | 1.46564  | 4.27564  | 1.94691  |
| Aim2     | 1.35405  | 3.41258  | 2.96916  |
| Tnnc1    | -1.05292 | 8.17795  | 1.90236  |
| Saa3     | 1.24202  | 4.20219  | -1.47618 |
| Ano10    | 1.6292   | 3.03071  | 2.52269  |
| Kcnj10   | 1.04966  | 4.44849  | -1.0689  |
| Hmmr     | 1.80427  | 3.39959  | 2.47429  |
| Gm5246   | 1.66024  | 3.98459  | 2.95807  |
| Scel     | 1.09913  | 3.31685  | 1.11478  |
| Hk1      | 1.50563  | 4.06462  | 2.62097  |
| Slc41a2  | 1.07073  | 3.35404  | 2.49805  |
| Cxcl17   | 1.15934  | 10.977   | 1.80099  |
| Dhrs9    | 1.55742  | 7.55449  | 2.86769  |
| Sgpp2    | -1.00238 | 4.39923  | -1.05836 |
| Lgals3   | 1.12647  | 3.00285  | 2.76212  |
| Egr2     | 1.55594  | 3.87394  | 2.04193  |
| Bcl2a1a  | 1.19188  | 3.68306  | 1.6418   |
| Slc6a1   | -1.02864 | 3.20528  | -1.0345  |
| Ccr12    | 1.55567  | 3.48268  | 1.84293  |
| Slc39a5  | -1.00316 | 3.21971  | -1.503   |
| Tnfaip8  | 1.28525  | 3.97753  | 2.79578  |
| Mphosph6 | 1.32693  | 3.43517  | 2.24593  |
| Sparc    | 1.9448   | 4.48549  | 2.18533  |
| Mastl    | 1.75543  | 3.103    | 2.70817  |
| Mcm6     | 1.56469  | 3.18724  | 2.35752  |
| Lrrc8b   | 1.64172  | 5.13372  | 2.71459  |
| Ptpre    | 1.0753   | 3.04129  | -1.101   |
| Bcmo1    | 1.97528  | 5.0878   | 2.73642  |
| Bcmo1    | 1.97528  | 5.0878   | 2.73642  |
| Gm6644   | 1.64396  | 3.17883  | 2.32851  |
| Loxl4    | 1.04204  | 3.07572  | 1.96935  |
| Plscr1   | 1.37352  | 4.09517  | 1.9741   |
| AU018778 | -1.57392 | -41.4982 | -1.42834 |
| Slco1a4  | -1.51322 | -19.0678 | -1.89702 |
| Rgn      | -1.83539 | -16.6101 | -2.59071 |
| Cyp2c38  | -1.65705 | -13.8181 | 1.70393  |
| Cyp2e1   | -1.16058 | -13.1262 | -1.53071 |
| Cyp3a11  | -1.53865 | -12.1093 | -2.03252 |
| Scp2     | -1.36439 | -8.0288  | -2.28325 |
| Cyp2c29  | -1.49185 | -6.77421 | -2.03266 |
| Ar       | -1.8696  | -6.70667 | 1.83971  |
| Aqp9     | -1.38984 | -6.65912 | -1.57117 |

|               |          |          |          |
|---------------|----------|----------|----------|
| Lipc          | -1.59236 | -6.59665 | -2.71702 |
| Fmo1          | -1.76245 | -6.41772 | -2.17815 |
| Oncut2        | -1.78903 | -5.65392 | -2.99663 |
| Ces3          | -1.31839 | -5.3528  | -2.52684 |
| Ndrp2         | -1.16033 | -4.88391 | -2.22918 |
| Slc22a1       | -1.59226 | -4.86524 | -2.7522  |
| Cyp4f15       | -1.14096 | -4.79444 | -2.86888 |
| Nr1i3         | -1.92399 | -4.74286 | -2.37994 |
| Slc17a2       | 1.05623  | -4.70611 | -1.20613 |
| Gulo          | -1.37427 | -4.58867 | 1.37684  |
| Chic1         | -1.25914 | -4.54565 | -1.85623 |
| BC031353      | -1.64839 | -4.47208 | -2.91739 |
| Cpox          | -1.66663 | -4.39758 | -1.93767 |
| Ecm1          | -1.27689 | -4.23218 | -1.44658 |
| Cyp2d22       | -1.15882 | -4.15264 | -2.68375 |
| Pank1         | 1.0125   | -2.28851 | -1.14658 |
| Elovl2        | -1.0334  | -3.81585 | -2.7922  |
| Aqp1          | -1.06227 | -3.81382 | -2.47537 |
| Aox1          | -1.64278 | -3.65387 | -1.69052 |
| Gpcpd1        | 1.62594  | -3.5959  | -1.00102 |
| Cyp7a1        | 1.65911  | -3.58212 | 1.32011  |
| Akr1c6        | -1.15342 | -3.5228  | -1.77612 |
| Apoc3         | -1.02922 | -3.50844 | -2.93569 |
| Lrrc28        | -1.71869 | -3.47035 | -2.66389 |
| Notum         | -1.29896 | -3.45968 | 1.56412  |
| Cyp4b1        | 1.1918   | -3.44736 | -1.01668 |
| Ttc39c        | 1.12869  | -3.43514 | -2.99692 |
| Slc17a4       | -1.13914 | -3.40147 | -2.27823 |
| Slc16a10      | -1.74043 | -3.40127 | 1.97327  |
| Gphn          | -1.35393 | -3.373   | -2.28505 |
| Pnpla8        | -1.41014 | -3.33915 | -1.99248 |
| Pdilt         | -1.91922 | -3.3256  | -2.98744 |
| Gpr182        | 1.20242  | -3.31797 | -2.70361 |
| Aox3          | 1.48399  | -3.31426 | -1.44549 |
| Mlxipl        | -1.13172 | -3.3047  | -2.18763 |
| Oplah         | -1.76275 | -3.3017  | -2.41866 |
| 9530008L14Rik | -1.43327 | -3.26666 | -2.31944 |
| 1300010F03Rik | -1.45268 | -3.26175 | -2.55633 |
| Alas1         | 1.08907  | -3.22625 | -1.63377 |
| Sepw1         | -1.43464 | -3.19924 | -2.14676 |
| Stab2         | 1.23279  | -3.19408 | -2.2839  |
| Slc22a3       | -1.76116 | -3.15427 | -1.65243 |
| Npr2          | -1.85612 | -3.15362 | -2.65082 |
| Bbox1         | -1.21536 | -3.15354 | -1.53994 |

|                   |          |          |          |
|-------------------|----------|----------|----------|
| St3gal4           | -1.18729 | -3.12194 | -2.57403 |
| Ablim3            | -1.53092 | -3.10454 | 1.39676  |
| Dhdh              | -1.19097 | -3.07544 | -2.94861 |
| Epm2a             | -1.5908  | -3.0708  | -2.88596 |
| 1600014C10Ri<br>k | -1.56785 | -3.04276 | -2.71145 |
| Ttc32             | -1.59064 | -3.04129 | -2.58907 |
| Rnf186            | -1.95941 | -3.04067 | -1.44387 |
| Prodh2            | -1.22756 | -3.03316 | -2.25176 |
| Lpin1             | 1.27567  | -3.0015  | 1.04576  |
| A530040E14R<br>ik | -1.08433 | 3.38172  | 1.62231  |
| Chic1             | -1.26981 | -3.1479  | -1.63559 |

Supporting Table 6

| Supporting Table 6, (Category IV transcripts) |                                      |                                    |                                    |             |
|-----------------------------------------------|--------------------------------------|------------------------------------|------------------------------------|-------------|
| Gene Symbol                                   | Fold-Change<br>(Nodular vs. Control) | Fold-Change<br>(HCC_A vs. Control) | Fold-Change<br>(HCC_B vs. Control) | Legend      |
| Amy2a5                                        | 1.27193                              | 1.19032                            | 47.5007                            | -15 onwards |
| Car4                                          | -1.07624                             | -1.01248                           | 30.1643                            | -3 to -15   |
| Grb10                                         | 1.20993                              | 2.60554                            | 21.4907                            | -3 to -1    |
| Amy2a5                                        | 1.10473                              | -1.02031                           | 20.7141                            | 1 to 3      |
| Sema3c                                        | 1.11058                              | -1.23529                           | 19.5512                            | 3 to 15     |
| Amy2a5                                        | 1.02195                              | -1.08801                           | 17.1522                            | 15 onwards  |
| Aldh1a2                                       | 1.27576                              | 1.87903                            | 17.0396                            |             |
| Klhl23                                        | 1.4497                               | 2.90572                            | 16.5211                            |             |
| Gpr64                                         | 1.31667                              | 1.16271                            | 14.8597                            |             |
| Fam180a                                       | 1.22292                              | 1.1703                             | 13.9817                            |             |
| Atp10a                                        | 1.40459                              | 1.24109                            | 13.9305                            |             |
| Airn                                          | 1.51036                              | 1.8283                             | 13.1623                            |             |
| Pgm5                                          | 1.00426                              | -2.07172                           | 9.72864                            |             |
| Serpine1                                      | 1.00661                              | 2.60234                            | 9.61473                            |             |
| Cyp2c39                                       | -2.4884                              | -3.41308                           | 8.56776                            |             |
| Gpc3                                          | 1.2189                               | -1.0577                            | 8.43606                            |             |
| Ctse                                          | -1.14317                             | 2.24757                            | 8.32345                            |             |
| Fst                                           | 1.71736                              | 2.77924                            | 8.07653                            |             |
| Lgr5                                          | -1.60272                             | -3.05043                           | 7.96855                            |             |
| Scn7a                                         | 1.23589                              | 1.33226                            | 7.58004                            |             |
| 9330182L06R<br>ik                             | -1.01816                             | -1.19713                           | 7.06272                            |             |
| Car2                                          | 1.61412                              | 1.84939                            | 7.03633                            |             |
| Prkg1                                         | 1.13572                              | 1.40601                            | 6.74905                            |             |
| Rnase1                                        | 1.01507                              | 1.90926                            | 6.73912                            |             |
| Vmn2r96                                       | 1.02409                              | 1.28406                            | 6.3979                             |             |
| Pdk4                                          | -1.76524                             | -2.28266                           | 6.37712                            |             |
| Itpr3                                         | 1.1773                               | 2.22053                            | 6.31221                            |             |
| Gcom1                                         | 1.30506                              | 1.90889                            | 5.8833                             |             |
| Lef1                                          | 1.17957                              | -1.09654                           | 5.87547                            |             |
| Avpr1a                                        | 1.13453                              | -3.21862                           | 5.75576                            |             |
| Arnt2                                         | 1.17737                              | 2.32996                            | 5.69168                            |             |
| Akr1b7                                        | 1.15743                              | 1.3269                             | 5.63946                            |             |
| Calml4                                        | 1.36695                              | 1.68447                            | 5.63328                            |             |
| H2-Q1                                         | 1.20387                              | 1.02656                            | 5.60883                            |             |
| Kitl                                          | 1.08971                              | -1.04084                           | 5.45247                            |             |
| Marcks                                        | 1.2033                               | 2.50563                            | 5.38596                            |             |
| Il1r1                                         | 1.12411                              | 1.63986                            | 5.29949                            |             |
| Fxyd3                                         | 1.44729                              | 2.63349                            | 5.21073                            |             |



|            |          |          |         |
|------------|----------|----------|---------|
| Tead1      | 1.03918  | 2.4646   | 5.14323 |
| Nkd1       | -1.33408 | -1.54123 | 4.97379 |
| Gnai1      | -1.16355 | 1.59782  | 4.93125 |
| Nt5e       | -1.27147 | 1.69504  | 4.6977  |
| Myc        | 1.75926  | 2.33816  | 4.67115 |
| AB041803   | 1.44529  | 1.2449   | 4.64783 |
| Mbnl3      | 1.66665  | -1.10086 | 4.64415 |
| Stra6      | -1.23762 | -1.15354 | 4.63909 |
| Fam118a    | 1.33209  | 2.1546   | 4.58336 |
| Anxa3      | 1.11144  | 1.9111   | 4.55771 |
| Slc24a4    | 1.47247  | 1.8503   | 4.54259 |
| AU040829   | 1.27338  | 1.94409  | 4.51874 |
| Pdgfrl     | 1.26066  | 1.32596  | 4.50503 |
| Jun        | 1.37278  | 2.56083  | 4.49577 |
| Mybl1      | 1.1249   | 2.61006  | 4.42467 |
| Pdgfc      | -1.00582 | 1.22476  | 4.40043 |
| Kdm3a      | 1.49398  | 2.31991  | 4.37713 |
| Sorcs2     | 1.99351  | 1.7816   | 4.3395  |
| Ahnak2     | 1.28699  | 1.91062  | 4.32487 |
| Gars       | 1.14943  | 2.14023  | 4.29665 |
| Axin2      | -1.55682 | -1.90796 | 4.26261 |
| Rab11fip5  | 1.70224  | 2.30633  | 4.22295 |
| Eppk1      | 1.72853  | 2.89305  | 4.22017 |
| Dgki       | -1.00017 | 1.00768  | 4.19226 |
| Nbea       | 1.542    | -1.15957 | 4.18891 |
| Nhs        | 1.03324  | 1.1865   | 4.17909 |
| Mpped2     | 1.06649  | 1.21094  | 4.17671 |
| 8430408G22 |          |          |         |
| Rik        | 1.67028  | 1.35312  | 4.1424  |
| Meg3       | 1.54929  | 1.84969  | 4.03932 |
| Unc5b      | 1.15499  | 2.87726  | 4.03812 |
| Pawr       | 1.59562  | 2.53621  | 4.01331 |
| Gm106      | -1.06414 | -1.11429 | 3.99904 |
| BC016579   | 1.91294  | 2.64391  | 3.93322 |
| Kif26b     | -1.15818 | -1.06891 | 3.92261 |
| Igf2r      | 1.25006  | 1.86361  | 3.92101 |
| Ophn1      | 1.57477  | 2.32817  | 3.91021 |
| A930039A15 |          |          |         |
| Rik        | -1.11859 | -1.8525  | 3.90423 |
| Cd24a      | 1.29066  | 2.83077  | 3.89559 |
| Samd4      | 1.63082  | 2.58163  | 3.87426 |
| Slc13a3    | 1.10204  | -1.30609 | 3.85914 |
| Ip6k2      | 1.45756  | 2.29722  | 3.85898 |
| Stk39      | 1.3987   | 1.81507  | 3.81425 |
| Cyp1b1     | 1.1714   | 1.61994  | 3.80599 |

|          |          |          |         |
|----------|----------|----------|---------|
| Phf16    | 1.20743  | 1.95792  | 3.75937 |
| Ahr      | 1.07848  | -1.1266  | 3.74628 |
| Trib2    | 1.14067  | -1.03944 | 3.69378 |
| Jub      | 1.70833  | 2.85167  | 3.6866  |
| Kbtbd11  | 1.10593  | 1.78587  | 3.6646  |
| Amot     | 1.86196  | 2.69374  | 3.64281 |
| Gm16368  | 1.86886  | 1.69534  | 3.64028 |
| Usp18    | 1.6608   | 1.31658  | 3.63422 |
| Slc1a5   | 1.34936  | 1.5014   | 3.62642 |
| Mthfd1l  | 1.89189  | 2.60746  | 3.61965 |
| Tnfrsf19 | -1.06917 | -1.07949 | 3.61079 |
| Tcf7     | 1.58987  | 1.36497  | 3.60845 |
| Slc36a4  | 1.75749  | 2.26485  | 3.57346 |
| Ccdc120  | 1.74833  | 2.57961  | 3.56563 |
| Dnase2a  | 1.46145  | 1.81648  | 3.55765 |
| Spnb1    | 1.29476  | 1.34631  | 3.55625 |
| Gas5     | 1.06989  | 2.0137   | 3.48149 |
| Slc7a5   | -1.13822 | 1.99886  | 3.42924 |
| Bcas1    | 1.007    | 2.19729  | 3.42867 |
| Etl4     | 1.71862  | 2.09061  | 3.4242  |
| Dst      | 1.30004  | 1.5423   | 3.42389 |
| Trpm4    | 1.73068  | 2.57956  | 3.42261 |
| Ehd2     | 1.27954  | 2.21252  | 3.41551 |
| Rnf157   | 1.00614  | 2.07279  | 3.40509 |
| Alpk1    | 1.65124  | 2.24658  | 3.4031  |
| Bcl2l11  | 1.79753  | 2.62299  | 3.3986  |
| Plxdc2   | 1.2421   | 1.3925   | 3.38607 |
| Asap2    | 1.06441  | 1.55682  | 3.38489 |
| Tmtc1    | 1.06315  | 1.31514  | 3.37569 |
| Crip2    | 1.65246  | 2.30151  | 3.36999 |
| Ptpn21   | 1.12247  | 1.65068  | 3.35423 |
| Gas7     | 1.67387  | 2.86578  | 3.35126 |
| Itga3    | -1.11704 | 2.27527  | 3.32297 |
| Scn3a    | 1.09246  | 1.12372  | 3.30656 |
| Exoc6b   | 1.26993  | 2.2112   | 3.30552 |
| Enc1     | 1.10151  | 1.77068  | 3.3031  |
| Wnk4     | 1.33303  | 1.59406  | 3.30218 |
| Mmp14    | 1.5002   | 2.78963  | 3.28305 |
| Tmc5     | 1.1605   | 2.62909  | 3.27503 |
| Dgke     | 1.15995  | 2.56683  | 3.27107 |
| Sec61a2  | 1.33422  | 2.01255  | 3.26656 |
| Ctgf     | 1.9353   | 1.74696  | 3.26534 |
| Epha7    | 1.14909  | -1.32428 | 3.25042 |
| Fmnl3    | 1.13825  | 2.39884  | 3.24639 |
| Trim50   | 1.12815  | 1.00061  | 3.22841 |

|                   |          |          |          |
|-------------------|----------|----------|----------|
| Gfpt2             | 1.05911  | 2.47068  | 3.22222  |
| Numbl             | 1.42624  | 2.56243  | 3.21099  |
| Rictor            | 1.42497  | 1.85735  | 3.20773  |
| Rell1             | 1.80201  | 2.37196  | 3.2019   |
| Rybp              | 1.47197  | 2.71833  | 3.19489  |
| Fat1              | 1.47838  | 2.35104  | 3.18862  |
| Nrbp2             | 1.47467  | 2.68971  | 3.18454  |
| 2410089E03R<br>ik | 1.5094   | 2.22155  | 3.18185  |
| Pkp1              | 1.42102  | 1.79892  | 3.16956  |
| Idua              | 1.7041   | 2.52041  | 3.16505  |
| Gpr153            | 1.10997  | 1.66547  | 3.16326  |
| Slc8a3            | 1.06258  | 2.19543  | 3.13899  |
| Mum111            | 1.00911  | 1.68158  | 3.13725  |
| Mmp7              | -1.1142  | -1.12938 | 3.13255  |
| Fam84a            | 1.60596  | 1.64956  | 3.13067  |
| Prkx              | 1.71054  | 2.87214  | 3.13025  |
| Ptbp2             | 1.20041  | 1.44252  | 3.12633  |
| Rasa2             | -1.06614 | 2.5915   | 3.11606  |
| Fos               | 1.27432  | 1.60926  | 3.10977  |
| Slc1a2            | -2.23842 | -11.8737 | 3.10488  |
| Shroom3           | 1.89182  | 2.56313  | 3.10174  |
| Slc12a4           | 1.48837  | 2.45808  | 3.097    |
| Rdh9              | -1.33459 | -1.39056 | 3.08999  |
| Rock2             | 1.0611   | 1.18219  | 3.08902  |
| Ttc3              | 1.4613   | 2.60865  | 3.08061  |
| Irs2              | -1.05254 | -1.3496  | 3.07847  |
| Trim2             | 1.4329   | 2.55845  | 3.07602  |
| Sorbs2            | 1.76062  | 2.31093  | 3.06947  |
| Mrgprg            | -1.03128 | -1.11822 | 3.05733  |
| Gramd1a           | 1.07206  | 1.46803  | 3.04057  |
| Dmxl2             | 1.19991  | 1.65902  | 3.03558  |
| Sorl1             | 1.64714  | 2.92408  | 3.0352   |
| Eif2ak3           | 1.59102  | 2.69956  | 3.03238  |
| Net1              | 1.19313  | 1.58124  | 3.02838  |
| 1500012F01R<br>ik | 1.40412  | 2.15192  | 3.02662  |
| Hectd2            | 1.31606  | 2.43945  | 3.02412  |
| Orm1              | -1.40025 | -2.90536 | -62.9089 |
| Cyp2j5            | -1.55223 | -2.10773 | -42.2503 |
| Orm2              | -1.25843 | 1.4124   | -18.4547 |
| Cpamd8            | 1.30467  | -2.19678 | -16.5526 |
| Gldc              | -1.60604 | -1.35992 | -14.3985 |
| Slc3a1            | -1.33239 | -2.57254 | -12.4926 |
| Saa2              | 3.28328  | 1.55833  | -12.2829 |

|                   |          |          |          |
|-------------------|----------|----------|----------|
| Necab1            | -1.32548 | -2.75222 | -11.0949 |
| Kynu              | -1.37385 | -2.74381 | -10.3611 |
| Timd2             | -1.33887 | -1.20453 | -9.20665 |
| Pigr              | -1.11047 | -1.48085 | -8.81636 |
| Aldh1b1           | 1.21789  | -1.01257 | -8.77212 |
| C8a               | 2.0195   | 1.14904  | -7.6401  |
| Gm11437           | 1.31317  | -2.72026 | -7.48863 |
| Saa1              | 2.9618   | 1.72521  | -7.32979 |
| Hsd11b1           | -1.00933 | -1.26223 | -7.25082 |
| Arg1              | -1.13738 | -2.81897 | -7.17322 |
| Fam169b           | -1.38417 | -2.84496 | -7.02883 |
| Aqp8              | -1.7978  | -1.95646 | -6.99782 |
| Serpina3k         | 1.13395  | -2.55861 | -6.46389 |
| Homer2            | 1.13877  | -1.48292 | -6.30163 |
| BC025446          | -1.37634 | -2.42126 | -6.27345 |
| B3galt1           | 1.12581  | -2.81089 | -6.13665 |
| Ftcd              | 1.11676  | -1.81617 | -6.08681 |
| Gck               | -1.38214 | -2.38643 | -5.96526 |
| Abhd3             | -1.54951 | -2.90761 | -5.91988 |
| Saa4              | -1.09347 | -2.20135 | -5.72117 |
| Abcg2             | -1.3257  | -1.02163 | -5.68884 |
| Pctp              | -1.67806 | -2.2789  | -5.65141 |
| Ctsc              | -1.57957 | -1.47052 | -5.39037 |
| Gchfr             | -1.93945 | -2.77263 | -5.21816 |
| Hrg               | 1.09527  | -1.54571 | -5.18667 |
| Cyp2d26           | -1.15244 | -1.70992 | -5.14094 |
| Aldh8a1           | -1.01137 | -2.54531 | -5.02545 |
| Slc22a7           | 1.4979   | -1.19862 | -4.97008 |
| Gckr              | -1.17632 | -2.39361 | -4.95269 |
| Cfhr1             | -1.19745 | -2.49968 | -4.86041 |
| Asgr2             | -1.12003 | -2.59527 | -4.84701 |
| Emr4              | -1.37582 | -2.56448 | -4.73662 |
| Slc23a1           | 1.10144  | -2.29857 | -4.72495 |
| Gjb2              | -1.40106 | -1.76491 | -4.50428 |
| Gas2              | -1.70786 | -2.53324 | -4.49676 |
| Acat1             | -1.20216 | -2.49141 | -4.47737 |
| Nlrp6             | 1.08899  | -2.24072 | -4.45341 |
| Cfhr3             | -1.54444 | -2.61827 | -4.44804 |
| Cd59b             | -1.39831 | -2.24689 | -4.4384  |
| Uroc1             | -1.12385 | -1.7955  | -4.42725 |
| Aadac             | -1.09064 | -2.05638 | -4.42367 |
| Klk1b4            | 1.22295  | -1.70178 | -4.38147 |
| 1810046K07Ri<br>k | -1.92192 | -2.65043 | -4.34498 |
| Cebpa             | -1.44435 | -2.97423 | -4.31475 |

|                   |          |          |          |
|-------------------|----------|----------|----------|
| Ghr               | -1.17818 | -2.44635 | -4.31343 |
| Hopx              | -1.10229 | -2.16508 | -4.31175 |
| Ptpn9             | -1.38263 | -2.47173 | -4.2968  |
| Serping1          | 1.01747  | -1.52114 | -4.2738  |
| Prg4              | -1.17924 | -1.21449 | -4.13927 |
| Olfml1            | -1.24275 | -1.68825 | -4.12427 |
| Slc2a5            | 1.50317  | -1.29828 | -4.07911 |
| Nit2              | -1.29808 | -2.47125 | -4.05677 |
| F8                | 1.29099  | -2.40957 | -4.04313 |
| Enpp3             | 1.18289  | -2.13524 | -4.00412 |
| Cd300ld           | -1.1495  | -2.77072 | -3.93146 |
| Ccl9              | 1.29335  | 1.37373  | -3.91982 |
| Emr1              | -1.30434 | -1.44963 | -3.86887 |
| Ces5              | -1.0863  | -1.71872 | -3.84964 |
| Slc46a1           | -1.36048 | -2.3473  | -3.82926 |
| Amdhd1            | 1.03441  | -2.4251  | -3.81102 |
| Apof              | -1.15722 | -1.83222 | -3.80543 |
| Hes6              | -1.91895 | -2.60958 | -3.80311 |
| Mocs1             | -1.44076 | -2.7681  | -3.79305 |
| Serpinf1          | 1.00206  | -1.30498 | -3.7764  |
| Ifit1             | -1.28928 | -2.82997 | -3.77304 |
| Ugt3a2            | -1.00862 | -1.66907 | -3.76706 |
| Slc25a15          | -1.60072 | -2.38896 | -3.74951 |
| Trem14            | -1.11655 | -2.73188 | -3.71737 |
| Qdpr              | -1.6838  | -2.55465 | -3.71004 |
| Dcxr              | -1.63565 | -2.86578 | -3.70966 |
| Atrnl1            | -1.16491 | -2.8665  | -3.6975  |
| 5830473C10Ri<br>k | 1.59026  | -2.17043 | -3.69329 |
| Rmnd1             | -1.63341 | -2.52988 | -3.67949 |
| Gsto1             | -1.45511 | -2.39944 | -3.67852 |
| Cpt2              | -1.72979 | -2.92319 | -3.67031 |
| Cxcl12            | -1.1436  | -2.3224  | -3.66387 |
| Glyat             | -1.34774 | -2.39553 | -3.66343 |
| Gbp6              | 1.14895  | -2.07078 | -3.64785 |
| Slc25a23          | -1.33945 | -2.46376 | -3.63224 |
| Itih1             | 1.30416  | -1.94677 | -3.61524 |
| Paqr3             | -1.63213 | -1.63183 | -3.5925  |
| Mgmt              | -1.66097 | -1.52846 | -3.58962 |
| Cxcl9             | 1.4611   | 1.91494  | -3.56955 |
| Ankrd33b          | -1.28974 | -2.64962 | -3.5635  |
| Gm5512            | -1.64533 | -2.59292 | -3.54369 |
| Phyhd1            | -1.2419  | -2.62972 | -3.52092 |
| Mug-ps1           | 1.28346  | -1.36896 | -3.50712 |
| Mup5              | -1.22372 | -2.42908 | -3.49699 |

|                   |          |          |          |
|-------------------|----------|----------|----------|
| D0H4S114          | -1.08885 | -1.68125 | -3.49697 |
| Mpa2l             | -1.41745 | -2.75724 | -3.48742 |
| Acat3             | -1.22997 | -1.73577 | -3.48729 |
| Nat8              | -1.57698 | -1.055   | -3.48493 |
| Afm               | -1.02129 | -1.99453 | -3.46106 |
| Mccc1             | -1.69305 | -2.84104 | -3.4524  |
| F7                | 1.21229  | -2.32356 | -3.44969 |
| Ccbl1             | -1.05838 | -2.70872 | -3.43623 |
| Hrsp12            | -1.2958  | -1.30316 | -3.426   |
| Cfp               | -1.15327 | -2.73735 | -3.42404 |
| Tmem53            | 1.01173  | -1.69293 | -3.41415 |
| Cbs               | -1.27873 | -2.50065 | -3.40721 |
| Gm4951            | -1.08268 | -2.74216 | -3.40497 |
| Chac2             | -1.36952 | -1.6532  | -3.4037  |
| Slc39a8           | -1.30619 | -2.66041 | -3.40245 |
| Ass1              | -1.1553  | -2.16442 | -3.39653 |
| Bhmt2             | -1.15469 | -2.3696  | -3.36261 |
| Echdc3            | -1.2554  | -2.09399 | -3.35938 |
| 0610008F07Ri<br>k | -1.60168 | -2.78556 | -3.35604 |
| Gatm              | 1.09013  | -1.31496 | -3.34899 |
| Ppp1r3b           | -1.45511 | -2.49495 | -3.33312 |
| Glyctk            | -1.37495 | -2.66014 | -3.32673 |
| Sms               | -1.52063 | -2.22998 | -3.31602 |
| Aspdh             | -1.01086 | -2.59338 | -3.31167 |
| Acsm3             | -1.43507 | -1.6418  | -3.29984 |
| 2610029I01Rik     | -1.07829 | -1.56208 | -3.28969 |
| Uox               | -1.05932 | -2.01806 | -3.28649 |
| Acadsb            | -1.41521 | -2.02681 | -3.28306 |
| Pcsk6             | -1.89058 | -2.41025 | -3.28001 |
| Pccb              | -1.28545 | -2.61117 | -3.24795 |
| Ldhd              | -1.51784 | -2.09312 | -3.23384 |
| 9030420J04Rik     | -1.27283 | -2.37606 | -3.20491 |
| C2cd2             | -1.58475 | -2.69141 | -3.20379 |
| Celf2             | -1.81347 | -2.16859 | -3.19456 |
| Fam195a           | -1.69856 | -2.07882 | -3.1917  |
| Suclg2            | -1.37372 | -2.51462 | -3.19137 |
| Pnkd              | -1.67123 | -1.53869 | -3.19075 |
| Fpr1              | -1.35637 | -1.82101 | -3.17705 |
| Acy1              | -1.33858 | -1.66531 | -3.16403 |
| Glo1              | -1.8818  | -1.9717  | -3.16331 |
| Oaf               | -1.20215 | -2.17074 | -3.1414  |
| Slc10a2           | 1.0973   | 2.43905  | -3.13329 |
| Pstpip2           | -1.30788 | -2.63421 | -3.12452 |
| Hibch             | -1.39562 | -2.09582 | -3.11333 |

|          |          |          |          |
|----------|----------|----------|----------|
| Fpgs     | -1.62735 | -2.94666 | -3.1097  |
| Fam176a  | -1.23617 | -1.67155 | -3.09856 |
| Mgam     | -1.25419 | -2.03098 | -3.08376 |
| Mmd      | -1.60296 | -2.58056 | -3.08002 |
| Nr1h4    | -1.12532 | -2.73868 | -3.0765  |
| Acy3     | 1.23632  | -2.05629 | -3.06811 |
| Eepd1    | -1.9012  | -2.60213 | -3.06775 |
| Cish     | -1.23202 | -2.98569 | -3.04975 |
| Ggt6     | -1.44038 | -1.88356 | -3.04228 |
| Sult1c2  | -1.3309  | -1.01911 | -3.02709 |
| Gas1     | -1.91618 | -2.73757 | -3.02116 |
| Nipsnap1 | -1.34542 | -1.68917 | -3.02075 |
| Echdc1   | -1.44615 | -2.33919 | -3.0181  |
| Galm     | -1.07426 | -2.3793  | -3.0169  |
| Hibadh   | -1.38402 | -2.52084 | -3.01526 |
| Tnfsf10  | 1.2813   | -1.47884 | -3.00057 |

Supporting Table 7

| Supporting Table 7, (Category IV transcripts) |                                      |                                    |                                    |             |
|-----------------------------------------------|--------------------------------------|------------------------------------|------------------------------------|-------------|
| Gene Symbol                                   | Fold-Change<br>(Nodular vs. Control) | Fold-Change<br>(HCC_A vs. Control) | Fold-Change<br>(HCC_B vs. Control) | Legend      |
| Timp1                                         | 1.65025                              | 47.5328                            | 16.1436                            | -15 onwards |
| Cpe                                           | 1.64063                              | 46.8117                            | 53.0535                            | -3 to -15   |
| Lcn2                                          | 1.63729                              | 17.7337                            | 3.28789                            | -3 to -1    |
| Apobec3                                       | 1.33143                              | 13.6147                            | 3.21626                            | 1 to 3      |
| Casp12                                        | 1.23194                              | 13.2394                            | 4.9444                             | 3 to 15     |
| Prom1                                         | 1.08693                              | 13.2349                            | 7.78962                            | 15 onwards  |
| Fstl3                                         | 1.20238                              | 13.2344                            | 6.15396                            |             |
| Kdelr3                                        | 1.30194                              | 12.8574                            | 5.16865                            |             |
| Actn3                                         | 1.17095                              | 12.833                             | 12.4529                            |             |
| Tspan13                                       | 1.85836                              | 12.2182                            | 9.55444                            |             |
| Pamr1                                         | 1.74829                              | 12.0232                            | 13.369                             |             |
| Lipn                                          | 1.13009                              | 11.7467                            | 4.23466                            |             |
| Slc25a4                                       | 1.19532                              | 11.1056                            | 6.1421                             |             |
| Sprr1a                                        | 1.3643                               | 11.0886                            | 9.88433                            |             |
| Rragd                                         | 1.64905                              | 10.8864                            | 3.26175                            |             |
| Elovl7                                        | 1.76477                              | 9.87082                            | 12.1677                            |             |
| Vill                                          | 1.53434                              | 9.42062                            | 4.66066                            |             |
| Neto1                                         | 1.19963                              | 9.1769                             | 5.66694                            |             |
| Wbp5                                          | 1.98874                              | 8.5141                             | 8.40853                            |             |
| Spon2                                         | 1.92218                              | 8.47313                            | 7.20515                            |             |
| Bex4                                          | 1.51721                              | 8.38808                            | 7.00337                            |             |
| Ankrd1                                        | 1.30593                              | 7.61296                            | 7.68294                            |             |
| Fads3                                         | 1.29174                              | 7.54847                            | 8.95494                            |             |
| Syt12                                         | 1.92819                              | 7.53775                            | 6.19514                            |             |
| Slpi                                          | 1.0836                               | 7.27965                            | 4.22289                            |             |
| Bicc1                                         | 1.19575                              | 7.15674                            | 5.47193                            |             |
| Wfdc3                                         | -1.00673                             | 6.50794                            | 4.02464                            |             |
| Psrc1                                         | 1.98382                              | 6.49131                            | 6.10586                            |             |
| Btg2                                          | 1.94839                              | 6.48019                            | 7.70054                            |             |
| Osmr                                          | 1.94046                              | 6.47489                            | 4.1503                             |             |
| Fhl3                                          | 1.91853                              | 6.17309                            | 8.61935                            |             |
| Pak1                                          | 1.91676                              | 6.07377                            | 5.54321                            |             |
| Sdcbp2                                        | 1.27869                              | 5.98796                            | 8.74705                            |             |
| Cav2                                          | 1.82037                              | 5.91925                            | 4.9881                             |             |
| S100a6                                        | 1.17083                              | 5.86993                            | 24.96                              |             |
| Ier3                                          | 1.08138                              | 5.80369                            | 6.77032                            |             |
| C630004H02                                    |                                      |                                    |                                    |             |
| Rik                                           | 1.44044                              | 5.80207                            | 6.24923                            |             |
| Tubb6                                         | 1.62878                              | 5.80135                            | 4.15945                            |             |
| F3                                            | 1.9605                               | 5.77645                            | 4.45007                            |             |



|            |          |         |         |
|------------|----------|---------|---------|
| Phgdh      | 1.44927  | 5.75616 | 3.24527 |
| Tnfrsf10b  | 1.45766  | 5.73675 | 4.28498 |
| Plekha2    | 1.83419  | 5.72416 | 5.16824 |
| F2rl1      | 1.68027  | 5.71852 | 5.59453 |
| Tnfrsf12a  | 1.09862  | 5.68673 | 6.48475 |
| Tes        | 1.24152  | 5.46319 | 7.53173 |
| Tmprss2    | 1.59783  | 5.42373 | 9.42569 |
| Plp2       | 1.69916  | 5.35561 | 4.90373 |
| Tubb2b     | 1.00878  | 5.33524 | 11.2852 |
| Irak3      | 1.3035   | 5.31299 | 7.27636 |
| Rab34      | 1.45297  | 5.27628 | 5.83746 |
| Kif5c      | 1.45518  | 5.20984 | 3.92793 |
| Dapp1      | 1.7537   | 5.15539 | 4.06593 |
| Gipc2      | 1.83053  | 5.08525 | 4.89887 |
| Emp1       | 1.60918  | 5.04904 | 4.47725 |
| Slc44a3    | 1.89303  | 5.04391 | 3.12551 |
| Vim        | 1.80453  | 5.04181 | 6.11242 |
| 4930583H14 |          |         |         |
| Rik        | 1.08878  | 5.01167 | 4.33725 |
| Reep2      | 1.61276  | 4.89227 | 4.00625 |
| Pdp1       | 1.62322  | 4.86772 | 3.33339 |
| Abca5      | 1.63917  | 4.77238 | 9.70687 |
| Ift57      | 1.02921  | 4.74934 | 4.1962  |
| Dnajc12    | 1.76252  | 4.7354  | 3.15167 |
| Gm10567    | 1.40646  | 4.68113 | 3.05429 |
| Chka       | 1.8503   | 4.62245 | 4.33907 |
| Myof       | 1.14777  | 4.62237 | 13.94   |
| Pqlc3      | 1.15279  | 4.56658 | 3.90818 |
| Lass5      | 1.18263  | 4.5423  | 3.52472 |
| Acot9      | 1.41582  | 4.53745 | 4.02427 |
| Gpnmb      | 1.59939  | 4.53371 | 6.19502 |
| Dab1       | 1.03268  | 4.40051 | 4.80036 |
| Serpib6a   | 1.09597  | 4.37469 | 8.3815  |
| Atf3       | 1.60595  | 4.35421 | 5.6749  |
| Doc2b      | 1.53581  | 4.30385 | 9.50577 |
| Ms4a6b     | 1.34342  | 4.28724 | 6.63812 |
| Bean       | 1.15701  | 4.26964 | 6.81531 |
| Scn1b      | 1.9556   | 4.26867 | 4.11135 |
| Fam164a    | -1.07379 | 4.23514 | 4.20138 |
| Cstb       | 1.3504   | 4.23136 | 3.3417  |
| Lgi3       | -1.06298 | 4.19448 | 5.30147 |
| Ano6       | 1.33296  | 4.19192 | 5.192   |
| Clcn5      | 1.30899  | 4.17789 | 4.80256 |
| Icosl      | 1.40206  | 4.1478  | 8.7431  |
| Cd44       | 1.12852  | 4.12731 | 3.00186 |

|                   |             |          |             |
|-------------------|-------------|----------|-------------|
| Msrb3             | 1.92161     | 4.03946  | 4.92765     |
| Plp2              | 1.480785    | 4.026115 | 3.94078     |
| 5430435G22<br>Rik | 1.06237     | 4.0124   | 3.58242     |
| Bcl2              | 1.71873     | 4.01043  | 4.26536     |
| Chmp4c            | 1.57641     | 3.98372  | 4.30406     |
| Klf6              | 1.93955     | 3.98327  | 8.95502     |
| Nck2              | 1.7388      | 3.90709  | 5.38822     |
| Ndrg1             | 1.33074     | 3.87773  | 7.9237      |
| Krt18             | 1.65374     | 3.84959  | 3.0962      |
| Arhgef2           | 1.75667     | 3.8315   | 7.44808     |
| Rbm3              | 1.930913333 | 3.78723  | 3.689896667 |
| Fabp4             | 1.80352     | 3.77438  | 3.38366     |
| Gprc5a            | -1.12317    | 3.77205  | 6.13673     |
| Atp8b2            | 1.47684     | 3.76801  | 4.0435      |
| Pbx3              | 1.43596     | 3.73401  | 4.98795     |
| Pvr               | 1.4959      | 3.7118   | 3.75486     |
| Igfbp3            | 1.52148     | 3.69581  | 5.27951     |
| Zfp9              | 1.74462     | 3.64312  | 3.11546     |
| Lrrc39            | 1.41063     | 3.6271   | 3.57449     |
| Sparcl1           | -1.04515    | 3.58349  | 3.36672     |
| Tspan5            | 1.14389     | 3.57844  | 3.19162     |
| Cyp4f16           | 1.83697     | 3.56279  | 3.07528     |
| Itpr1l2           | 1.14153     | 3.53884  | 3.61548     |
| Tcfcp2l1          | -1.23418    | 3.53597  | 3.77991     |
| Kcnk6             | 1.43689     | 3.51939  | 3.52936     |
| Tm4sf4            | 1.24868     | 3.50315  | 4.12694     |
| Plekha1           | 1.70521     | 3.46835  | 3.35078     |
| Lrrc20            | 1.55586     | 3.45442  | 3.42526     |
| Epdr1             | 1.02145     | 3.43673  | 3.35557     |
| Lama5             | 1.58734     | 3.43088  | 7.02658     |
| Arhgap11a         | 1.8474      | 3.42247  | 3.22875     |
| Large             | 1.38289     | 3.41726  | 3.93582     |
| Vsig10            | 1.95755     | 3.41315  | 3.99968     |
| Cpm               | 1.62425     | 3.37618  | 4.75455     |
| Fam60a            | 1.60943     | 3.37575  | 6.78991     |
| 2900073G15<br>Rik | 1.538       | 3.369    | 3.58323     |
| Rps6ka3           | 1.50258     | 3.35892  | 3.01453     |
| Gm5068            | 1.4691      | 3.32936  | 3.91514     |
| Syt12             | 1.62041     | 3.31475  | 4.03099     |
| Mpzl1             | 1.43162     | 3.30406  | 3.20468     |
| Wisp1             | 1.06314     | 3.25814  | 4.20828     |
| Dnm3              | 1.81426     | 3.23191  | 4.45213     |
| Mllt3             | 1.76269     | 3.22563  | 3.75399     |

|               |          |          |          |
|---------------|----------|----------|----------|
| Ctnna1        | 1.31961  | 3.19723  | 3.48299  |
| Vat1          | 1.19325  | 3.19253  | 3.88115  |
| Qpct          | 1.36173  | 3.16435  | 7.57698  |
| Eid1          | 1.28117  | 3.15226  | 3.05171  |
| Dpysl5        | 1.11961  | 3.15093  | 3.32346  |
| Reln          | 1.86953  | 3.13537  | 5.3344   |
| Flna          | 1.25121  | 3.12101  | 4.01645  |
| Lamb2         | 1.29096  | 3.08907  | 4.86585  |
| Tubb5         | 1.66085  | 3.08278  | 3.45829  |
| Map3k1        | 1.6328   | 3.07655  | 5.63151  |
| Sox4          | 1.08731  | 3.03844  | 4.85544  |
| Map4k4        | 1.23531  | 3.03238  | 5.30628  |
| Vcl           | 1.98027  | 3.01356  | 3.04936  |
| Lgr5          | -1.60272 | -3.05043 | 7.96855  |
| Avpr1a        | 1.13453  | -3.21862 | 5.75576  |
| 2810007J24Rik | -1.71609 | -75.4588 | -98.8299 |
| Gm4738        | 1.05     | -61.7125 | -70.2064 |
| Es31          | 1.0501   | -43.9168 | -103.465 |
| Ugt2b1        | -1.56119 | -35.5483 | -67.5393 |
| Pck1          | -1.07902 | -22.8687 | -16.4268 |
| Cyp2c54       | -1.78193 | -21.775  | -16.9421 |
| Hsd3b5        | 1.28639  | -21.5509 | -24.9099 |
| C730048C13Rik | -1.86867 | -19.5842 | -17.7807 |
| Mup21         | -1.49235 | -18.9458 | -21.0496 |
| Cmah          | -1.10026 | -16.2912 | -37.9393 |
| Serpina4-ps1  | 1.77426  | -15.5098 | -19.8463 |
| Mup3          | -1.11015 | -15.3342 | -157.691 |
| Cyp1a2        | -1.90936 | -27.7768 | -4.4666  |
| Slco1b2       | -1.96047 | -25.7374 | -3.22862 |
| Hamp          | -1.26832 | -24.1181 | -6.13549 |
| Apoa5         | -1.2748  | -22.3583 | -14.6832 |
| Vsig4         | -1.26075 | -18.0069 | -11.9548 |
| G6pc          | -1.63402 | -17.6032 | -6.51916 |
| Cyp2d13       | -1.30641 | -16.7338 | -7.06523 |
| Cyp3a25       | -1.32782 | -16.603  | -7.34989 |
| Pon1          | -1.34055 | -16.3822 | -4.30702 |
| Adh4          | -1.77119 | -16.1485 | -9.2961  |
| Hpd           | -1.28824 | -14.2161 | -39.935  |
| Es22          | -1.96956 | -13.5656 | -16.2051 |
| Keg1          | -1.03658 | -13.4054 | -41.9946 |
| Sdr9c7        | -1.9051  | -12.7519 | -17.4906 |
| Slco1a1       | 2.44495  | -11.662  | -18.6103 |
| AI317395      | -1.844   | -10.7372 | -16.2476 |
| Gls2          | -1.55575 | -10.6788 | -39.2034 |

|          |          |          |          |
|----------|----------|----------|----------|
| Ces1     | -1.52999 | -8.57218 | -18.2617 |
| Agxt     | -1.31939 | -8.27962 | -28.5971 |
| Aass     | -1.54603 | -7.70864 | -37.1446 |
| Apon     | -1.28706 | -7.1608  | -16.0734 |
| Cyp2f2   | -1.03224 | -6.19571 | -29.8694 |
| Aadat    | -1.24916 | -6.10411 | -16.2675 |
| Otc      | -1.18503 | -5.7384  | -19.9687 |
| Mosc1    | -1.30738 | -5.52151 | -16.9653 |
| Ido2     | -1.26205 | -5.03804 | -17.0566 |
| Mbl1     | -1.89171 | -4.72049 | -17.8056 |
| Tdo2     | -1.21118 | -4.58523 | -21.2744 |
| Abat     | -1.58125 | -4.34325 | -26.9604 |
| C9       | -1.2022  | -4.11377 | -89.9319 |
| Gm5631   | -1.66223 | -14.1673 | -12.5655 |
| Inmt     | -1.1847  | -13.246  | -10.3374 |
| Hsd17b6  | 1.59512  | -12.9126 | -4.90067 |
| Clec4g   | -1.02713 | -12.26   | -7.80369 |
| Cd5l     | -1.10284 | -11.2692 | -12.3296 |
| Car1     | -1.42439 | -11.2627 | -14.7245 |
| Dnase1l3 | -1.0062  | -11.1212 | -7.71302 |
| Cyp7b1   | -1.41707 | -10.6268 | -10.1071 |
| Upp2     | 1.39062  | -10.5673 | -4.29061 |
| Cyp8b1   | -1.0859  | -10.2421 | -7.27562 |
| Dpp4     | -1.24157 | -9.91658 | -3.05957 |
| Hsd3b2   | -1.46149 | -9.90673 | -10.7892 |
| Mettl7b  | -1.80643 | -9.86267 | -11.53   |
| Srd5a1   | -1.4045  | -8.93    | -9.78695 |
| Igfals   | -1.43251 | -8.81117 | -7.00091 |
| Nudt7    | -1.47731 | -8.49655 | -13.0738 |
| Tmem86b  | -1.483   | -8.45605 | -6.00275 |
| Slc25a21 | -1.38967 | -8.12582 | -3.53673 |
| Nnmt     | -1.89581 | -7.85771 | -13.3646 |
| Hsd3b3   | 1.13277  | -7.77103 | -4.36084 |
| Scnn1a   | -1.65292 | -7.61573 | -7.22721 |
| Slc17a3  | -1.35064 | -7.31021 | -9.46844 |
| Dpyd     | -1.6416  | -6.90364 | -4.79101 |
| Cyp4f14  | -1.17041 | -6.76403 | -8.33253 |
| Slc27a5  | -1.24428 | -6.75714 | -3.85048 |
| Prhoxnb  | 1.11371  | -6.67979 | -12.267  |
| Ugt2a3   | -1.01344 | -6.66153 | -7.84136 |
| Cml1     | -1.29892 | -6.62895 | -10.1202 |
| Bmp2     | -1.11733 | -6.54132 | -3.82771 |
| Nox4     | 1.2092   | -6.41725 | -5.68698 |
| Dpys     | -1.42142 | -6.41305 | -5.69942 |
| Clec4f   | -1.27002 | -6.34448 | -7.10423 |

|                   |          |          |          |
|-------------------|----------|----------|----------|
| Adhfe1            | -1.55055 | -6.3303  | -5.43054 |
| Gpt               | -1.64908 | -6.26284 | -10.2532 |
| Gnmt              | -1.53377 | -6.2445  | -14.1598 |
| Colec10           | -1.32594 | -6.20915 | -7.90007 |
| Adh6-ps1          | -1.52557 | -6.20738 | -8.22623 |
| Alas2             | -1.40934 | -6.03665 | -8.44277 |
| Pecr              | -1.69276 | -5.94883 | -9.19134 |
| Cth               | -1.91632 | -5.7366  | -9.93078 |
| Mbl2              | -1.40877 | -5.66878 | -4.94366 |
| Mup1              | -1.28606 | -5.63123 | -14.1978 |
| Pygl              | -1.26823 | -5.54121 | -3.04693 |
| 1100001G20Ri<br>k | -1.95094 | -5.44181 | -10.3537 |
| Oit3              | 1.20571  | -5.41534 | -4.10126 |
| Mup20             | 1.02378  | -5.37217 | -10.3266 |
| Dmgdh             | -1.38198 | -5.3579  | -4.85634 |
| Ppm1k             | -1.62897 | -5.35081 | -6.69443 |
| Cyp2c67           | -1.51423 | -5.34038 | -3.09113 |
| Slc2a2            | -1.26548 | -5.28796 | -4.98642 |
| Hamp2             | -1.76689 | -5.27018 | -6.35254 |
| Inhbc             | -1.3612  | -5.18181 | -9.37025 |
| Phlda1            | -1.4376  | -5.15687 | -5.89229 |
| Serpina12         | 1.20013  | -5.15442 | -7.00781 |
| 1600002H07Ri<br>k | -1.66928 | -5.1168  | -5.99968 |
| Al132487          | -1.50354 | -5.08714 | -4.97783 |
| Bco2              | -1.51382 | -5.0725  | -3.29577 |
| Acss2             | -1.8686  | -5.07216 | -4.58759 |
| Folr2             | -1.38305 | -5.0362  | -5.14032 |
| Fbp1              | -1.07119 | -5.00115 | -6.01544 |
| Agxt2l1           | -1.74237 | -4.99322 | -5.76511 |
| Kmo               | -1.16986 | -4.95369 | -6.38803 |
| Vipr1             | -1.59194 | -4.95215 | -3.96391 |
| Apol9b            | -1.18036 | -4.94808 | -5.05962 |
| Rxrg              | -1.81179 | -4.94594 | -5.35184 |
| 3110049J23Rik     | -1.8402  | -4.89478 | -5.21592 |
| Ehd3              | -1.07428 | -4.85583 | -4.44661 |
| Cml2              | -1.2038  | -4.80235 | -13.0582 |
| Car3              | -1.11176 | -4.77301 | -3.99709 |
| Apol9a            | -1.20157 | -4.73671 | -5.11097 |
| Aacs              | -1.77588 | -4.71762 | -3.87834 |
| Gna14             | -1.78309 | -4.67983 | -4.29223 |
| Fabp7             | -1.3836  | -4.67933 | -7.4461  |
| Gstk1             | -1.83929 | -4.64643 | -5.8797  |
| Bdh2              | -1.74684 | -4.57917 | -8.96919 |

|               |          |          |          |
|---------------|----------|----------|----------|
| Cd55          | -1.01659 | -4.55418 | -3.7174  |
| Cabc1         | -1.78498 | -4.54256 | -4.39048 |
| Cyp2d40       | -1.31956 | -4.49099 | -3.60361 |
| Slc10a1       | -1.06592 | -4.49048 | -4.26528 |
| Plxnc1        | -1.22574 | -4.47283 | -4.83712 |
| Fcna          | -1.5428  | -4.46352 | -4.37318 |
| Pde7b         | -1.37503 | -4.41488 | -3.39166 |
| Shpk          | -1.46804 | -4.39133 | -5.42171 |
| Mup2          | -1.15778 | -4.38893 | -11.0431 |
| Creb3l3       | -1.36624 | -4.30992 | -4.70028 |
| Fgf1          | -1.46146 | -4.27571 | -4.58621 |
| Aldh1l1       | -1.45385 | -4.2464  | -6.75994 |
| ErbB4         | -1.73262 | -4.24598 | -4.44596 |
| Fn3k          | -1.48856 | -4.23462 | -5.07608 |
| Hgd           | -1.46582 | -4.22921 | -3.13488 |
| Clec1b        | -1.1111  | -4.22881 | -4.12517 |
| Afmid         | -1.3562  | -4.21059 | -10.918  |
| Dhtkd1        | -1.49945 | -4.18304 | -7.13582 |
| Ces6          | -1.21885 | -4.18065 | -4.54184 |
| Lin7a         | -1.0802  | -4.17454 | -7.30125 |
| Adra1b        | -1.61139 | -4.17375 | -4.57078 |
| Hao           | -1.36658 | -4.11217 | -13.8036 |
| Srr           | -1.84354 | -4.10753 | -6.98424 |
| Agphd1        | -1.021   | -4.10508 | -4.70228 |
| Sntg2         | -1.42657 | -4.08787 | -4.30714 |
| Igf1          | -1.05471 | -4.04717 | -13.5554 |
| C8g           | -1.28044 | -4.02898 | -5.34405 |
| Pklr          | -1.17795 | -3.98678 | -3.06562 |
| Akr1c14       | -1.22306 | -3.96877 | -3.63303 |
| S1pr5         | -1.7785  | -3.92397 | -5.22885 |
| Sult1b1       | -1.61996 | -3.91073 | -6.02001 |
| G630090E17Rik | -1.96941 | -3.91026 | -5.67129 |
| Clcn2         | -1.66742 | -3.90209 | -3.81914 |
| C6            | 1.24998  | -3.89536 | -14.4614 |
| Gm14403       | -1.27141 | -3.89073 | -3.7383  |
| Mafb          | -1.36729 | -3.87566 | -7.12085 |
| 3110057O12Rik | -1.45332 | -3.87295 | -3.10895 |
| Mup11         | -1.13796 | -3.86879 | -10.2665 |
| Ugt2b37       | -1.81825 | -3.86291 | -5.36846 |
| Gcdh          | -1.65548 | -3.85305 | -3.76627 |
| Abhd15        | -1.7832  | -3.83188 | -3.41497 |
| Dio1          | 1.01815  | -3.82633 | -8.45206 |
| Ephx2         | -1.60676 | -3.80567 | -3.46121 |

|                   |          |          |          |
|-------------------|----------|----------|----------|
| Bphl              | -1.54616 | -3.78482 | -3.85151 |
| Abcb11            | -1.44073 | -3.78188 | -3.24408 |
| Mup7              | -1.12391 | -3.75244 | -9.74784 |
| Ivd               | -1.54548 | -3.75063 | -5.37084 |
| Tm7sf2            | -1.63493 | -3.73336 | -3.96124 |
| Sfxn5             | -1.67171 | -3.72065 | -5.39756 |
| Sec14l4           | -1.16738 | -3.69522 | -4.28612 |
| Ifit3             | -1.26721 | -3.6823  | -5.11366 |
| Adssl1            | -1.9208  | -3.66933 | -4.05695 |
| Cyp2c44           | 1.19465  | -3.66512 | -4.19307 |
| Baat              | -1.26892 | -3.66373 | -4.12153 |
| Acsm5             | -1.00067 | -3.65684 | -3.89381 |
| Acsm1             | -1.13241 | -3.64718 | -5.02604 |
| Bhmt              | -1.1372  | -3.57486 | -5.48603 |
| Cyp2u1            | 1.16223  | -3.57335 | -4.66534 |
| Ugt2b5            | -1.88056 | -3.57196 | -7.06369 |
| Mccc2             | -1.42635 | -3.55969 | -3.2224  |
| Sult5a1           | -1.40684 | -3.55806 | -4.75385 |
| Fam47e            | -1.50392 | -3.55146 | -6.28961 |
| Pemt              | -1.26814 | -3.52241 | -3.16698 |
| Kcnn2             | -1.15286 | -3.51888 | -8.04663 |
| Csrp3             | -1.23274 | -3.51741 | -3.4098  |
| Sec14l2           | -1.53955 | -3.5135  | -4.50238 |
| Hsd3b7            | -1.7287  | -3.50182 | -3.02216 |
| Mpv17l            | -1.29628 | -3.46828 | -5.08822 |
| Mrc1              | 1.11199  | -3.45834 | -3.39323 |
| 9030617O03Ri<br>k | -1.26303 | -3.43941 | -3.94623 |
| Ugt2b38           | -1.46807 | -3.43903 | -5.23031 |
| Akr1d1            | -1.53051 | -3.42651 | -7.01328 |
| Clec2h            | 2.45858  | -3.42541 | -3.81134 |
| Pcca              | -1.65318 | -3.42339 | -5.87969 |
| Cd163             | -1.44765 | -3.42023 | -3.82844 |
| Slc6a12           | -1.09777 | -3.41716 | -3.55409 |
| Aspg              | -1.05834 | -3.39414 | -9.15901 |
| Bdh1              | -1.38127 | -3.36739 | -3.29652 |
| Lrat              | -1.3401  | -3.3621  | -3.03028 |
| Il1rap            | -1.19669 | -3.31126 | -7.72681 |
| Pxmp2             | -1.23199 | -3.30367 | -4.68994 |
| Tymp              | -1.67179 | -3.29985 | -4.5574  |
| Pm20d1            | -1.4105  | -3.26899 | -3.15771 |
| Slc26a1           | -1.10772 | -3.24767 | -3.88908 |
| 4931406C07Ri<br>k | -1.39161 | -3.19919 | -3.0507  |
| Ehhadh            | -1.63503 | -3.19164 | -3.49231 |

|                   |          |          |          |
|-------------------|----------|----------|----------|
| Acad11            | -1.28943 | -3.18548 | -3.41374 |
| Agmat             | -1.47295 | -3.18105 | -3.28377 |
| Pltp              | -1.50948 | -3.16494 | -4.65294 |
| Ppara             | -1.27117 | -3.15785 | -3.07691 |
| Il1a              | -1.12039 | -3.15743 | -3.33466 |
| Timd4             | -1.29316 | -3.15083 | -3.89426 |
| Hal               | -1.09034 | -3.15051 | -11.807  |
| 1700001C19Ri<br>k | -1.02287 | -3.14456 | -3.37093 |
| Fahd1             | -1.4046  | -3.13651 | -3.18614 |
| Plekhb1           | -1.7152  | -3.13146 | -5.38499 |
| Gm10319           | 1.19009  | -3.11377 | -8.36454 |
| Hao1              | -1.28158 | -3.11352 | -5.90589 |
| Orm3              | -1.13428 | -3.10796 | -5.80044 |
| Sds               | -1.07852 | -3.09316 | -13.5563 |
| Syde2             | -1.55148 | -3.03928 | -3.55813 |
| Aldh9a1           | -1.26104 | -3.02208 | -3.96882 |
| Rtp3              | 1.05893  | -2.49024 | -5.02734 |



Supporting Table 8

| Supporting Table 8<br>(Shared genes with Esnault et al., 2014) |                                      |                                    |                                    |             |
|----------------------------------------------------------------|--------------------------------------|------------------------------------|------------------------------------|-------------|
| Gene Symbol                                                    | Fold-Change<br>(Nodular vs. Control) | Fold-Change<br>(HCC_A vs. Control) | Fold-Change<br>(HCC_B vs. Control) | Legend      |
| Thbs1                                                          | 2.08549                              | 4.91817                            | 51.9212                            | -15 onwards |
| 2900073G15Rik                                                  | 1.538                                | 3.369                              | 3.58323                            | -3 to -15   |
| Acsl4                                                          | 2.65093                              | 3.95778                            | 5.47142                            | -3 to -1    |
| Ahnak                                                          | 3.63901                              | 4.49717                            | 8.16587                            | 1 to 3      |
| Ankrd1                                                         | 1.30593                              | 7.61296                            | 7.68294                            | 3 to 15     |
| Ano6                                                           | 1.33296                              | 4.19192                            | 5.192                              | 15 onwards  |
| Atf3                                                           | 1.60595                              | 4.35421                            | 5.6749                             |             |
| Bcl2                                                           | 1.71873                              | 4.01043                            | 4.26536                            |             |
| Btg2                                                           | 1.94839                              | 6.48019                            | 7.70054                            |             |
| Ctps2                                                          | 2.56166                              | 4.45756                            | 3.89212                            |             |
| Dnm3                                                           | 1.81426                              | 3.23191                            | 4.45213                            |             |
| Egr1                                                           | 7.12353                              | 9.59988                            | 11.1919                            |             |
| Ets2                                                           | 2.14067                              | 5.47127                            | 6.20986                            |             |
| F3                                                             | 1.9605                               | 5.77645                            | 4.45007                            |             |
| Fam60a                                                         | 1.62115                              | 3.17408                            | 6.3873                             |             |
| Fhl3                                                           | 1.91853                              | 6.17309                            | 8.61935                            |             |
| Flna                                                           | 1.25121                              | 3.12101                            | 4.01645                            |             |
| Ier3                                                           | 1.08138                              | 5.80369                            | 6.77032                            |             |
| Ifngr1                                                         | 2.15542                              | 5.30745                            | 6.54226                            |             |
| Klf6                                                           | 1.93955                              | 3.98327                            | 8.95502                            |             |
| Lass5                                                          | 1.18263                              | 4.5423                             | 3.52472                            |             |
| Msrb3                                                          | 1.92161                              | 4.03946                            | 4.92765                            |             |
| Myadm                                                          | 3.65914                              | 5.59333                            | 4.91929                            |             |
| Myh9                                                           | 2.03021                              | 3.16179                            | 3.31906                            |             |
| Nedd9                                                          | 2.26994                              | 5.35801                            | 5.65459                            |             |
| Tes                                                            | 1.24152                              | 5.46319                            | 7.53173                            |             |
| Tpm1                                                           | 2.03419                              | 3.72081                            | 4.29852                            |             |
| Tubb5                                                          | 1.66085                              | 3.08278                            | 3.45829                            |             |
| Tubb6                                                          | 1.62878                              | 5.80135                            | 4.15945                            |             |
| Vcl                                                            | 1.98027                              | 3.01356                            | 3.04936                            |             |
| Vim                                                            | 1.80453                              | 5.04181                            | 6.11242                            |             |
| Wdr1                                                           | 2.02059                              | 3.50992                            | 3.33673                            |             |
| Anxa5                                                          | 1.91645                              | 3.20169                            | 2.63096                            |             |
| Efemp2                                                         | 1.25906                              | 8.1605                             | 2.33074                            |             |
| Egr2                                                           | 1.55594                              | 3.87394                            | 2.04193                            |             |
| Glipr2                                                         | 1.04867                              | 5.69497                            | 1.17986                            |             |
| Hk1                                                            | 1.50563                              | 4.06462                            | 2.62097                            |             |
| Lgals3                                                         | 1.12647                              | 3.00285                            | 2.76212                            |             |
| Pdgfa                                                          | 2.32682                              | 3.38694                            | 2.72126                            |             |
| Timp3                                                          | 1.54039                              | 3.38018                            | 2.19682                            |             |
| Atp10a                                                         | 1.40459                              | 1.24109                            | 13.9305                            |             |

|               |          |         |         |
|---------------|----------|---------|---------|
| Cdkn2c        | 2.3356   | 2.99309 | 3.28594 |
| Ctgf          | 1.9353   | 1.74696 | 3.26534 |
| Enc1          | 1.10151  | 1.77068 | 3.3031  |
| Fam118a       | 1.33209  | 2.1546  | 4.58336 |
| Fat1          | 1.47838  | 2.35104 | 3.18862 |
| Fos           | 1.27432  | 1.60926 | 3.10977 |
| Gpr153        | 1.10997  | 1.66547 | 3.16326 |
| Jun           | 1.37278  | 2.56083 | 4.49577 |
| Mybl1         | 1.1249   | 2.61006 | 4.42467 |
| Pawr          | 1.59562  | 2.53621 | 4.01331 |
| Rell1         | 1.80201  | 2.37196 | 3.2019  |
| Rock2         | 1.0611   | 1.18219 | 3.08902 |
| Samd4         | 1.63082  | 2.58163 | 3.87426 |
| Serpine1      | 1.00661  | 2.60234 | 9.61473 |
| Tead1         | 1.03918  | 2.4646  | 5.14323 |
| Trpm4         | 1.73068  | 2.57956 | 3.42261 |
| 2410089E03Rik | 1.1649   | 1.3875  | 2.03184 |
| 3110003A17Rik | 1.28861  | 2.94157 | 2.15108 |
| A130022J15Rik | 1.29475  | 2.00259 | 1.58633 |
| Actg1         | 1.38255  | 2.20465 | 1.96317 |
| Alpk1         | 1.50921  | 1.88706 | 2.79467 |
| Anxa1         | 1.534    | 2.45552 | 2.15443 |
| Aurka         | 1.43396  | 2.31094 | 1.4415  |
| Bcl10         | 1.34432  | 2.08982 | 1.96095 |
| C130039O16Rik | 1.40568  | 1.99536 | 2.2472  |
| Calu          | 1.27227  | 2.25606 | 1.72367 |
| Cav1          | 1.46668  | 2.57696 | 2.7883  |
| Cdc25a        | 1.28529  | 2.5654  | 2.48283 |
| Cdc42bpa      | 1.12956  | 1.2988  | 2.20546 |
| Cdc42se2      | -1.01359 | 2.15693 | 1.36811 |
| Cdk17         | -1.1619  | 1.30138 | 1.73612 |
| Cirbp         | 1.43045  | 1.49257 | 2.47002 |
| Col12a1       | -1.22826 | 1.14034 | 1.7459  |
| Coro1c        | 1.77033  | 2.8479  | 2.13126 |
| Crim1         | 1.26716  | 1.21479 | 2.838   |
| Cstf3         | -1.01042 | 1.34182 | 1.98939 |
| Ctps          | -1.09513 | 2.6922  | 1.99106 |
| Cyr61         | -1.69692 | 1.28125 | 1.94982 |
| D1Bwg0212e    | 1.16141  | 1.21248 | 2.2341  |
| Dusp10        | 1.08485  | 2.42793 | 2.9616  |
| Dusp5         | 1.71432  | 2.68366 | 2.0775  |
| Enpp1         | 2.48106  | 2.52511 | 2.8159  |
| Fam100a       | 1.28912  | 1.58765 | 2.23111 |
| Fam3c         | 1.97924  | 2.2753  | 2.33265 |
| Fam55c        | 1.07673  | 1.19622 | 2.52386 |
| Flnb          | 1.2648   | 1.73145 | 2.38915 |
| Fosl2         | 1.00727  | 1.30545 | 2.83034 |
| Gmcs          | 1.43633  | 2.67487 | 2.54246 |

|          |          |         |         |
|----------|----------|---------|---------|
| Ier5     | 1.28745  | 2.93185 | 2.07434 |
| Ifrd1    | 1.35821  | 1.91777 | 2.66318 |
| Iqgap1   | 1.28076  | 2.22    | 2.58262 |
| Irf2bp2  | 1.1219   | 1.66679 | 2.25512 |
| Itgav    | 1.28173  | 2.0257  | 1.31071 |
| Junb     | -1.02318 | 1.6205  | 1.99381 |
| Lass6    | 1.25452  | 2.13333 | 2.87766 |
| Leprotl1 | 1.20466  | 2.23169 | 2.29447 |
| Lox      | 1.12368  | 1.7637  | 2.0342  |
| Lpp      | 1.19297  | 1.38714 | 2.1197  |
| Maff     | 1.00133  | 1.61689 | 2.42149 |
| Map3k8   | -1.05942 | 1.36437 | 2.35395 |
| Map4k3   | 1.11517  | 1.46675 | 2.00121 |
| Mical2   | 1.08006  | 2.21789 | 2.55108 |
| Morc4    | 1.20625  | 2.50298 | 1.78377 |
| Msn      | 1.26633  | 2.07967 | 2.47652 |
| Myo1c    | 1.41531  | 2.09177 | 2.5834  |
| Nbeal1   | 1.42204  | 1.82814 | 2.75676 |
| Nedd4l   | -1.0618  | 1.56249 | 2.16897 |
| Nfkbiz   | -1.23105 | 1.27797 | 1.69275 |
| Notch2   | 1.41532  | 1.77874 | 2.3229  |
| Nt5c2    | 1.15196  | 2.26324 | 2.27732 |
| Pdlim7   | 1.52199  | 1.88495 | 2.91847 |
| Per1     | 1.63057  | 1.23222 | 2.47816 |
| Pip5k1a  | 1.12368  | 1.42244 | 2.05904 |
| Plekhg2  | 1.16736  | 1.71145 | 2.02136 |
| Ppm1h    | 1.29048  | 2.02993 | 1.59223 |
| Prc1     | 2.37678  | 2.95884 | 2.67791 |
| Prkab2   | 1.36216  | 1.85091 | 2.26828 |
| Ptrf     | 1.13115  | 2.67292 | 2.32217 |
| Rassf1   | 1.11748  | 1.39797 | 2.11182 |
| Rhob     | 1.42694  | 1.99405 | 2.81879 |
| Rrbp1    | 2.0868   | 2.00107 | 1.38365 |
| Rrm2     | 2.13227  | 1.43612 | 1.64964 |
| Sh3gl3   | 1.51163  | 2.07892 | 2.49083 |
| Smg1     | 1.30708  | 1.66572 | 2.49076 |
| Snx6     | 1.12148  | 1.24678 | 2.04849 |
| Stil     | 1.39099  | 2.13622 | 2.19782 |
| Tacc2    | -1.05793 | 1.31333 | 1.92412 |
| Tfrc     | 1.14038  | 1.73411 | 2.02384 |
| Tjp2     | 1.21676  | 1.96322 | 2.90689 |
| Tmem98   | -2.3007  | 1.88541 | 1.51128 |
| Tmpo     | 1.38141  | 1.81959 | 2.15575 |
| Tpm4     | 1.50705  | 2.05166 | 2.06635 |
| Unc45a   | 1.26868  | 1.71221 | 2.23633 |
| Vgll3    | 1.05422  | 1.52047 | 2.54403 |
| Wwtr1    | 1.07553  | 1.49584 | 2.54857 |
| Zyx      | 1.33908  | 1.66106 | 2.21519 |

|               |          |          |          |
|---------------|----------|----------|----------|
| Oxct1         | -1.07327 | 2.303    | -1.29682 |
| Prepl         | -1.03856 | 1.4947   | -1.35271 |
| Zdhhc14       | 1.76837  | 1.08202  | -1.26772 |
| Kitl          | 1.08971  | -1.04084 | 5.45247  |
| Lpin1         | 1.27567  | -3.0015  | 1.04576  |
| Lrp4          | 1.12763  | -1.57881 | 1.27096  |
| Nr4a1         | -2.11235 | -1.85589 | 1.43937  |
| Prpf39        | 1.21632  | -1.05342 | 2.02022  |
| Rusc2         | -1.15812 | -1.13917 | 1.93269  |
| S1pr3         | 3.64268  | -1.10253 | 1.55324  |
| Sgms1         | -1.47029 | -1.14055 | 1.96036  |
| Stard13       | -1.26675 | -1.12741 | 2.26811  |
| 1300014I06Rik | -1.53484 | -2.06475 | -1.0622  |
| 3110057O12Rik | -1.45332 | -3.87295 | -3.10895 |
| A430107O13Rik | 1.22043  | -1.4555  | -1.66231 |
| Aacs          | -1.77588 | -4.71762 | -3.87834 |
| Acly          | -1.52331 | -2.0821  | -2.78101 |
| Akr1e1        | -1.09657 | -2.15421 | -2.0762  |
| BC031353      | -1.64839 | -4.47208 | -2.91739 |
| Ccrn4l        | -1.63728 | -2.04547 | -2.52723 |
| Cpt2          | -1.72979 | -2.92319 | -3.67031 |
| Crybg3        | -1.32124 | -2.45913 | -1.21867 |
| Dusp6         | -1.62469 | -2.03647 | -2.38458 |
| Ecm1          | -1.27689 | -4.23218 | -1.44658 |
| Elovl5        | -1.64393 | -2.41924 | -2.65706 |
| Epb4.1l3      | -1.04181 | -1.79283 | -2.06558 |
| Fam126b       | -1.31162 | -2.34535 | -2.20395 |
| Hibadh        | -1.38402 | -2.52084 | -3.01526 |
| Hsd12         | -2.14625 | -2.36482 | -1.45808 |
| Lym5          | -1.43164 | -2.9334  | -2.64353 |
| Mmd           | -1.60296 | -2.58056 | -3.08002 |
| Mreg          | -1.48445 | -1.8208  | -2.64436 |
| Mthfd1        | -1.17074 | -2.94592 | -2.40104 |
| Oat           | -5.92246 | -22.6358 | -9.70971 |
| Pank1         | 1.0125   | -2.28851 | -1.14658 |
| Phlda1        | -1.4376  | -5.15687 | -5.89229 |
| Plk3          | -2.08115 | -4.01634 | -5.73913 |
| Prg4          | -1.17924 | -1.21449 | -4.13927 |
| Rgl1          | -1.11501 | -2.28009 | -2.3727  |
| Slc3a1        | -1.33239 | -2.57254 | -12.4926 |
| Snai2         | 1.46627  | -1.16113 | -1.66228 |
| Syde2         | -1.55148 | -3.03928 | -3.55813 |
| Trap1         | -1.20308 | -1.72506 | -2.23404 |
| Trib1         | -1.30515 | -2.0613  | -2.43816 |
| Usp2          | 1.20189  | -2.18804 | -1.41176 |

## Inventory of Supporting Information

- A. Supporting Materials & Methods**
- B. References to Supporting Materials & Methods**
- C. Legends to Supporting Figures**
- D. Legends to Supporting Tables**

### **A. Supporting Materials & Methods**

#### **Expression of SRF-VP16 in murine hepatocytes *in vivo*.**

*Alfp-CreER<sup>T2</sup>* mice were generated as described in Suppl. Figure 1A. Liver specificity of CreER<sup>T2</sup> recombinase activity (Suppl. Figure 1B), its tamoxifen-inducible activation (Suppl. Figure 1B), as well as its spontaneous activity (Suppl. Figure 1B, C) are shown. Stop-floxed SRF-VP16 mice (*Gt(ROSA)26Sor<sup>tm1(SRF-VP16)Antu</sup>* mice (1) were bred with *Srf-flex1* (floxed *Srf* exon 1) (2) and *Alfp-CreER<sup>T2</sup>* animals to obtain triple transgenic mice, *Srf<sup>flex1/wt</sup>::SRF-VP16<sup>+/-</sup>::Alf-CreER<sup>T2</sup>+/-* (termed *SRF-VP16<sup>Hep</sup>* mice), with a mixed genetic background. Spontaneous Cre activation in *Alfp-CreER<sup>T2</sup>* mice was followed upon breeding with mTmG-reporter mice (3) (Suppl. Figure 1C, D). Genotyping was performed by PCR (see Supplementary Materials and Methods). Animal housing and handling was conducted in accordance with the Federation of European Laboratory Animal Science Associations upon approval by the Regierungspräsidium Tübingen.

#### **Primers and conditions for genotyping mice.**

Genotyping of mice was performed by PCR using DNA extracted from ear punch biopsies. The primers used to detect the Cre-transgene were *Alfp-CreER<sup>T2</sup>-fw* (5'-

CGGTCCGATGCAACGAGTGATGAGG-3') and Alfp-CreER<sup>T2</sup>-bw (5'-CCAGAGACGGAAATCCA TCGCTCG-3'). Three-primer PCR was used to genotype the *Srf* allele (2, 4) and the ROSA26-SRF-VP16 allele (1). Detection of Cre-mediated excision of floxed Stop-cassette for the SRF-VP16 construct was tested by PCR on DNA from various organs. Primers for the Rosa26 wt and the non-recombined Rosa26-SRF-VP16 loci were as previously described (1), while primers for the recombined SRF-VP16 locus were: ROSA-fw (5'-GGAGGCAGGAAGCACTTGCTCTCC-3') and hSRF-bw (5'-GCCTTCTTCATGATGCCCGTCTTC-3'). Further experimental details are available upon request. Animal housing and handling was conducted in accordance with the Federation of European Laboratory Animal Science Associations and approval by the local ethics committee (Regierungspräsidium Tübingen).

#### **Antibodies for immunoblotting and immuno-histochemistry.**

|                       |                                       |           |
|-----------------------|---------------------------------------|-----------|
| EGR1                  | Cell Signaling, Danvers, MA (#4153)   | 1:1000    |
| GAPDH                 | Hyttest Ltd, Turku, Finland           | 1:20000   |
| Ki67                  | DCS, Hamburg, Germany (KI681R06)      | undiluted |
| GS                    | Sigma-Aldrich, St. Louis, MO (G2781)  | 1:1000    |
| VP16                  | Abcam, Cambridge, UK (ab4808)         | 1:500     |
| DPP IV                | R&D Systems, Minneapolis, MN (BAF945) | 1:100     |
| p21                   | BD Biosciences (556431)               | 1:50      |
| Caspase 3 (activated) | Cell Signaling, Danvers, MA (#9661)   | 1:1000    |

#### **Immunoblot analysis.**

Discontinuous SDS-PAGE was performed using standard protocols. PVDF-membrane (45 µm; Roth, Karlsruhe, Germany) was used, with indicated antibodies according to manufacturers recommendations.

### **Histological Analysis.**

Immuno-histochemical analyses were performed on 5 or 7 µm paraffin-embedded liver sections (citrate buffer antigen retrieval) using the indicated antibodies with standard protocols. For Figure 2B, the EGR1-positive nodular components within randomly chosen 10 mm<sup>2</sup> section areas were quantitated. For Figure 2C, numbers of Ki67-positive hepatocyte nuclei were counted within a continuous area of 5 mm<sup>2</sup> in diameter and normalized over numbers of total hepatocyte nuclei.

### **Analysis of genomic mutations of murine HCCs.**

Sanger sequencing of cDNA: 1 µg of total RNA, after extraction from whole liver tissue using RNeasy-Kit (Qiagen) and digestion with DNase I (Roche, Switzerland), was converted to cDNA using MMLV-Reverse Transcriptase (Promega) primed by random hexamers. Subsequent target gene amplification used sequence specific primers (Ctnnb1-fw: 5'-GTCAGCTCGTGCCTGTGAA-3'; Ctnnb1-bw 5'-CAGTGTCGTGATGGCGTAGA-3') and Phusion Polymerase (New England Biolabs). PCR products were purified by agarose gel electrophoresis, extracted and subjected to Sanger sequencing using above primers. Sanger sequencing of genomic DNA was performed as described previously (5), as were mutation analyses based on restriction fragment length polymorphisms for *Ha-Ras* and *B-Raf* (5, 6).

## Quantitative High-Resolution DNA Methylation Analysis of murine samples.

To quantitatively assess DNA methylation levels in imprinting control regions and promoter regions of overexpressed candidate genes at single CpG resolution of 40 SRF-VP16-triggered murine HCCs, we used the MassARRAY system as described previously (7, 8). Briefly, 1 µg of genomic DNA was bisulfite converted and target regions were amplified by PCR using T7 promoter tagged primers. PCR products were then transcribed in vitro, cleaved with RNaseA, and subsequently analyzed by matrix-assisted laser desorption ionization time-of-flight mass spectrometry. Analysis of methylation profiles was done using the EpiTYPER® software (Sequenom, San Diego, CA, USA).

Primer sequences for MassARRAY assays:

| GeneName         | Remarks             | LeftPrimer                      | RightPrimer                 | Length | CpGs |
|------------------|---------------------|---------------------------------|-----------------------------|--------|------|
| <i>H19-DMR 1</i> | DMR amplicon 1      | TTTGAGGAGTTTTAAGGTAGAAGGG       | AAACCGAAAACTTAACTGATTCCC    | 456    | 19   |
| <i>H19-DMR 2</i> | DMR amplicon 2      | TTGTAGAAATTTTATGTTTTTTGGATG     | CTACCCTAACAATCCCCAAATTAAC   | 485    | 6    |
| <i>Aim-1SS 1</i> | promoter            | TGGTGGTIAGGAAAATTTTATAGGA       | CTAACTTACCTCAATTCGCCAAAT    | 493    | 7    |
| <i>Cd63</i>      | promoter            | GGGGTAGGGTTTTGAATAAGGA          | ACCTAAATCACCACAACTAACAAAA   | 304    | 16   |
| <i>Igf2</i>      | promoter (* site)   | GAGATTTAAGGGTAGTTTTAGTGAAT      | TCCCGAACTTAAATCTAATTTTTCTAA | 451    | 25   |
| <i>Igf2</i>      | promoter (site 1)   | TTTTTAATTTTGTITTTGTTGGGA        | CCAAATAAACCCTTTAAAAACCTAA   | 467    | 17   |
| <i>Igf2</i>      | promoter (site 2)   | GGGATAGATATTAGGATTAGTGGG        | CCCTACACAAAAATTAACAACAAC    | 452    | 56   |
| <i>Igf2</i>      | promoter (site 3)   | TTTTGTTTTTTIAGGGTATTTIAGGGTT    | AAATACATCCTCTCCTCTACTTAAA   | 406    | 19   |
| <i>Igf2</i>      | site 4              | TTGATTTATGATGGTTGTGGATA         | AAAACAAAAAAACCCTCACTTCTT    | 453    | 18   |
| <i>Igf2</i>      | site 5              | TTGGGTTTTGGGATTTAAGTTTTAG       | CTCCTCTTAAACAAAAACAATTCCA   | 459    | 5    |
| <i>Igf2bp6</i>   | promoter amplicon 1 | AAATATTAGAAATAATTTGGGAAGTAAATAG | TTATCCCTCTCTCCTAAAAACAACCT  | 444    | 22   |
| <i>Igf2bp6</i>   | promoter amplicon 2 | AGGTTGTTTTAGGAGAGAGGGATAA       | ACCCAACCTACATCTATCCAAATTC   | 255    | 15   |

## Methylation profiling of human HCCs.

The Infinium HumanMethylation27 BeadChip (v1.2; Illumina, San Diego, CA) was used to obtain genome-wide DNA methylation profiles across 27,578 CpG dinucleotides located in a region of 1 kb around the transcription start site of 14,495 genes as described previously (9).

## Expression profiling of human HCCs.

Expression profiles were generated from 40 human HCCs as described previously (9). In brief, quality and integrity of the total RNA was controlled using an Agilent Technologies 2100 Bioanalyzer (Agilent Technologies; Waldbronn, Germany). Two hundred ng of



total RNA were applied for Cy3-labelling reaction using the one color Quick Amp Labeling protocol (Agilent Technologies). Labeled cRNA was hybridized to Agilent human 8x60k microarrays at 68°C for 16 h and scanned using the Agilent DNA Microarray Scanner. Expression values were calculated by the software package Feature Extraction 10.5.1.1. Complete data are available online (<http://www.ncbi.nlm.nih.gov/geo/query/acc.cgi?acc=GSE50579>).

### **Genomic DLC1 status of human HCCs.**

The genomic status of the DLC1 locus was retrieved from an existing aCGH data set available at the NCBI Gene Expression Omnibus database (<http://www.ncbi.nlm.nih.gov/geo/query/acc.cgi?token=hersflskaayigkro&acc=GSE8351>) (9, 10). The definition of the genomic status was based on the segmentation software GLAD (11).

### **CTNNB1 mutational analysis of human HCCs.**

For amplification of exon three of the CTNNB1 gene, the following primer-set was generated: CTNNB1-F: CAA TCT ACT AAT GCT AAT ACT GTT TCG, and CTNNB1-R: CAA AAC TGC ATT CTG ACT TTC A. The following temperature profile was used: 94°C for 5 min followed by 30 cycles of 94°C for 1 min, 55°C for 1 min, and 72°C for 1 min. A final extension step of 72°C for 5 min was added. PCR-amplification was carried out using *Pfu* DNA Polymerase (Fermentas, Germany) according to the manufacturer's instructions. PCR fragments were directly sequenced bidirectionally on an ABI Prism<sup>®</sup> 377-18 DNA Sequencer (Applied Biosystems, USA) using the BigDye<sup>®</sup> Termination v1.1 Cycle Sequencing Kit (Applied Biosystems) according to the manufacturer's instructions.

### **Expression profiling of murine samples.**

The purity and concentration of total RNA were determined by absorbance measurements at 260 and 280 nm using a spectrophotometer (ND-1000; NanoDrop Technologies, Wilmington, DE). Respective RNAs were used to generate double-stranded cDNA with the random primer according to a microarray (GeneChip; Affymetrix Inc., USA) target labeling protocol, as described by the manufacturer. The processed cDNA was hybridized to Affymetrix arrays (GeneChip MouseGene 1.0 ST) for 16 to 18 hours to screen a total of 26,166 transcripts. Overall 12 samples were used for hybridization to microarray (GeneChip; Affymetrix Inc.). Each microarray was washed and stained with streptavidin-phycoerythrin and scanned (Affymetrix Scanner System 3000 7G; microarray; Affymetrix Inc.). A visual quality control measurement was performed to ensure proper hybridization after each chip was scanned. Additional quality control parameters, such as scaling factors used to normalize the chips, average background, and noise, were also evaluated.

For statistical analysis of microarray data, all CEL format files were imported to PARTEK Genomics Suite, version 6.4, where the RMA algorithm was applied to yield log signal values on each probe set. Significance was calculated using a *t*-test without multiple testing corrections, selecting all transcripts with a minimum change in expression level of 1.5-fold together with  $P < 0.05$ .

For Venn diagram representation, the cut-off for the selection of differentially regulated genes was 2 fold for premalignant nodules and 3-fold for HCC samples. The list of genes from each sample category were uploaded to the GeneVenn web application and the venn diagram generated (12).

For clustering analysis, the expression level values of the 58 genes normalized over controls were uploaded to Gene Cluster version 3.0. Clustering was performed on genes and arrays based on the 'Complete Linkage' method. Heatmaps were viewed using Treeview software.

### **Quantitative real-time PCR.**

cDNA was obtained as described above. Subsequent quantitative PCR was performed using Sybr-Green reaction mix (Applied Biosystems, Foster City, CA; Roche, Rotkreutz, Switzerland) and the Applied Biosystems 7500fast System (Applied Biosystems, USA).

Primers used:

|        |                          |                          |
|--------|--------------------------|--------------------------|
| Actb   | AGAGAGGTATCCTGACCCTGAAGT | CACGCAGCTCATTGTAGAAGGTGA |
| Car3   | TGATGGCATCGCTGTGGTT      | CCTCGTCTTCACCTTC         |
| Cdh1   | TCGCCCTGCTGATTCTGATC     | GGCTCTTTGACCACCGTTCTC    |
| Cdk16  | CACCCCCACGCAAGA          | GCTGGTAGTGACAGGCGTTTG    |
| Ctnnb1 | GTGCAATTCCTGAGCTGACA     | CTTAAAGATGGCCAGCAAGC     |
| Cyr61  | TGAAGAGGCTTCCTGTCTTTGG   | GGCGTGCAGAGGGTTGAA       |
| Dusp2  | TGCGAGGCGGTTTCAAAA       | CCTGGGCAGGAGCTTCAG       |
| Egr1   | GCCGAGTGTCACTCCAAGAAATGG | TCCACCATCGCCTTCTCATT     |
| Egr2   | GTTGACTGTCACTCCAAGAAATGG | AGCGCAGCCCTGTAGGC        |
| Fos    | CCTGCCCTTCTCAACGA        | GCTCCACGTTGCTGATGCT      |
| Gapdh  | TGGATCTGACGTGCCGC        | TGCCGTCTTCACCACCTT       |
| Mmp14  | CCTGCCTGCATCCATCAATA     | CCCAGTGCTTATCTCCTTTGAAG  |
| Myc    | GTCTTTCCCTACCCGCTCAAC    | GTGGAATCGGACGAGGTACAG    |
| Snail1 | CAACTATAGCGAGCTGCAGGTCTA | GGTCGTAGGGCTGCTGGAA      |
| Vcl    | CCAAGGTCAGAGAAGCCTTCC    | CGTAGCTGTTCAAGGTCTGGT    |

|      |                         |                         |
|------|-------------------------|-------------------------|
| Vim  | GGTTGACACCCACTCAAAAAGAA | TCTCATTGATCACCTGTCCATCT |
| Vp16 | CTTAGACGGGCAAGT         | CCCAACATGTCCAGATCGAAA   |

### **Isolation and analysis of intrahepatic immune cells (IHICs).**

Minced liver tissues (up to 1.5 g per mouse) were used for isolation of IHICs by digestion for 30 minutes at 37°C, 5% CO<sub>2</sub> in 6 ml RPMI-1640 medium containing 5% FCS, 1 mg/ml collagenase D (Sigma-Aldrich, St. Louis, MO), and 0.01 mg/ml DNase I (Roche). The suspension was forced through a 70µm cell strainer and centrifuged at 4°C for 5 minutes at 400 g and pelleted erythrocytes were lysed for 10 min in 150 mM NH<sub>4</sub>Cl, 10 mM KHCO<sub>3</sub>, 2 mM NaEDTA. 10 ml PBS, containing 2% FCS, were added and samples centrifuged at 4°C for 5 min at 400 g. Pellets were resuspended in 10ml 35% Percoll in HBSS (Biochrom, Berlin, Germany) and centrifuged at room temperature for 30 minutes at 850g to select for IHICs. Pellets were suspended in PBS for immunostaining. Flow cytometry and cell population analysis was performed as previously described (13), using the following antibodies: CD4-PE (RM4-5), Gr1-eFluor450 (RB6-8C5), CD11c-APC (N418), CD8a-FITC (53-6.7), F4/80-PE-Cy7 (BM8); CD11b-APC-eFluor780 (M1/70), NKp46-PerCp-Cy5.5 (29A1.4).

### **Statistical analysis.**

Data were analyzed using the *Graph Pad Prism 5.0* Software. Statistical analysis was performed using two-tailed Student's t-test. *P* levels of <0.05 were considered significant. Code for *P* levels: \* = < 0.05; \*\* = < 0.01; \*\*\* = < 0.001.

## **B. References to Supporting Materials and Methods**

1. Sandstrom J, Heiduschka P, Beck SC, Philippar U, Seeliger MW, Schraermeyer U, Nordheim A. Degeneration of the mouse retina upon dysregulated activity of serum response factor. *Molecular vision* 2011;17:1110-1127.
2. Wiebel FF, Rennekampff V, Vintersten K, Nordheim A. Generation of mice carrying conditional knockout alleles for the transcription factor SRF. *Genesis* 2002;32:124-126.
3. Muzumdar MD, Tasic B, Miyamichi K, Li L, Luo L. A global double-fluorescent Cre reporter mouse. *Genesis* 2007;45:593-605.

4. Angstenberger M, Wegener JW, Pichler BJ, Judenhofer MS, Feil S, Alberti S, Feil R, et al. Severe intestinal obstruction on induced smooth muscle-specific ablation of the transcription factor SRF in adult mice. *Gastroenterology* 2007;133:1948-1959.
5. Aydinlik H, Nguyen TD, Moennikes O, Buchmann A, Schwarz M. Selective pressure during tumor promotion by phenobarbital leads to clonal outgrowth of beta-catenin-mutated mouse liver tumors. *Oncogene* 2001;20:7812-7816.
6. Strathmann J, Schwarz M, Tharappel JC, Glauert HP, Spear BT, Robertson LW, Appel KE, et al. PCB 153, a non-dioxin-like tumor promoter, selects for beta-catenin (Catnb)-mutated mouse liver tumors. *Toxicol Sci* 2006;93:34-40.
7. Ehrich M, Nelson MR, Stanssens P, Zabeau M, Liloglou T, Xinarianos G, Cantor CR, et al. Quantitative high-throughput analysis of DNA methylation patterns by base-specific cleavage and mass spectrometry. *Proc Natl Acad Sci U S A* 2005;102:15785-15790.
8. Claus R, Lucas DM, Stilgenbauer S, Ruppert AS, Yu L, Zucknick M, Mertens D, et al. Quantitative DNA methylation analysis identifies a single CpG dinucleotide important for ZAP-70 expression and predictive of prognosis in chronic lymphocytic leukemia. *J Clin Oncol* 2012;30:2483-2491.
9. Neumann O, Kesselmeier M, Geffers R, Pellegrino R, Radlwimmer B, Hoffmann K, Ehemann V, et al. Methylome analysis and integrative profiling of human HCCs identify novel protumorigenic factors. *Hepatology* 2012;56:1817-1827.
10. Schlaeger C, Longerich T, Schiller C, Bewerunge P, Mehrabi A, Toedt G, Kleeff J, et al. Etiology-dependent molecular mechanisms in human hepatocarcinogenesis. *Hepatology* 2008;47:511-520.
11. Hupe P, Stransky N, Thiery JP, Radvanyi F, Barillot E. Analysis of array CGH data: from signal ratio to gain and loss of DNA regions. *Bioinformatics* 2004;20:3413-3422.
12. Pirooznia M, Nagarajan V, Deng Y. GeneVenn - A web application for comparing gene lists using Venn diagrams. *Bioinformatics* 2007;1:420-422.
13. Autenrieth SE, Warnke P, Wabnitz GH, Lucero Estrada C, Pasquevich KA, Drechsler D, Gunter M, et al. Depletion of dendritic cells enhances innate anti-bacterial host defense through modulation of phagocyte homeostasis. *PLoS Pathog* 2012;8:e1002552.

## C. Legends to Supporting Figures

### Supporting Figure 1

#### ***Alfp-CreERT<sup>2</sup>* mice display hepatocyte-specific Cre activity**

(A) Strategy to generate the *Alfp-CreERT<sup>2</sup>* single-copy transgenic mouse line by DNA microinjection into mouse oocytes of the *Alfp-CreERT<sup>2</sup>* BAC. This BAC construct is 200kb in size and harbors transcriptional regulatory elements of the *Alb* (albumin) and *Afp* (alpha-fetoprotein) genes in their original chromosomal arrangement. Genomic BAC clone RP23-279P6 (from mouse BAC library RP23) was recombined with the PCR-generated

CreER<sup>T2</sup> cassette, containing 50bp arms of homology to the albumin exon 1 locus.

Recombination inserted the CreER<sup>T2</sup> cassette within *Alb* exon1, thereby disrupting *Alb* coding sequences on the BAC but preserving the promoter and relevant 5' regulatory elements. Verified clones were recombined with FLP recombinase to excise the ampicillin cassette (Amp), thereby generating the *Alfp*-CreER<sup>T2</sup> BAC.

**(B)** Cre-mediated loxP recombination events in several organs of *Alfp-CreER<sup>T2</sup>* mice with and without five 1 mg tamoxifen injections (controls were injected with carrier solution), as evidenced by PCR of the *Srf-flex1* locus. Before treatment, exclusively in liver tissue, a faint band of the recombined *Srf-lx* allele can be detected (left). After tamoxifen application, exclusively in liver tissue, a strong induction of the recombined *Srf-lx* allele is found (right).

**(C, D)** Using the mTmG-reporter, within the first 10 weeks of age of untreated *Alfp-CreER<sup>T2</sup>* mice, the accumulated percentage of recombined hepatocytes was quantified to be 0.38% ( $\pm$  0.08%) (n=9).

### **Supporting Figure 2**

**Age dependence (weeks) of LBWR displayed by individual control (diamonds) and *SRF-VP16<sup>Hep</sup>* mice.** Red crosses indicate presence of HCC.

### **Supporting Figure 3**

**Methylation status of three individual CpG sites within the *hIGF2* and *mlgf2* promoter regions of human and murine liver tissues, respectively.**

The CpG sites analyzed are named site 1, site 2 and site 3, corresponding to their locations shown in Fig. 7C (lower). The human HCC samples represent the Heidelberg cohort of 40; the murine samples represent 22 control liver tissues, 24 nodular liver

tissues, and 40 independent SRF-VP16-triggered tumor tissues. The individual human HCC samples indicated in red represent the SC10 tumors.

## **D. Legends to Supporting Tables**

### **Supporting Table 1**

**Some SRF-VP16-triggered HCCs display activating point mutations in *Cttnb1*.**

Twenty-six HCC samples (derived from 16 animals) analyzed for point mutations in the coding sequences of *Cttnb1*. Activating mutations were found in 12 samples, each revealing one point mutation (located in one of codons 31, 34, 37, or 41; rows 3 and 4), resulting in a defined amino acid change (row 5).

### **Supporting Table 2**

**Complete listing of dysregulated transcripts in *SRF-VP16<sup>Hep</sup>* liver tissues (pre-malignant nodules, HCC<sub>A</sub> (*Cttnb1* wt), and HCC<sub>B</sub> (*Cttnb1* mutated)).**

### **Supporting Table 3**

**Listing of dysregulated transcripts in Category I (see Figure 6A).**

### **Supporting Table 4**

**Listing of dysregulated transcripts in Category II (see Figure 6A).**

### **Supporting Table 5**

**Listing of dysregulated transcripts in Category III (see Figure 6A).**



### **Supporting Table 6**

**Listing of dysregulated transcripts in Category IV (see Figure 6A).**

### **Supporting Table 7**

**Listing of dysregulated transcripts in Category V (see Figure 6A).**

### **Supporting Table 8**

**Listing of *SRF-VP16<sup>Hep</sup>* dysregulated genes shared with the 960-membered set of direct SRF target genes mediating the serum response of transformed fibroblasts (Esnault et al., 2014).**
